# Supplementary material
Source: PubMed Central journal article supplement (PMC6358283)
Supplement: NIHMS996239-supplement-Cartesian_Coordinates.pdf [file NIHMS996239-supplement-Cartesian_Coordinates.pdf]

*Supporting Information*

**Cobalt Pincer Complexes in Catalytic C-H Borylation: The  
Pincer Ligand Flips Rather Than Dearomatizes**

Haixia Li<sup>1</sup>, Jennifer V. Obligation<sup>2</sup>, Paul J. Chirik<sup>2</sup>, and Michael B. Hall<sup>1\*</sup>

<sup>1</sup>*Department of Chemistry, Texas A&M University, College Station, Texas 77843, USA*

<sup>2</sup>*Department of Chemistry, Princeton University, Princeton, New Jersey 08544, USA*

**Corresponding Author**

\* [mbhall@tamu.edu](mailto:mbhall@tamu.edu)

## Cartesian coordinates and energies of the species involved in the text

Cartesian coordinates of the species shown in the following are obtained from the optimizations in gas phase at the level of  $\omega$ B97XD/BS1, where atoms of the <sup>i</sup>PrPNP ligand except N and P use cc-pVDZ and the others (including the Co) use Def2TZVP unless otherwise stated. However, the species of **TS<sub>2-12</sub>**, **12**, **2<sup>R</sup>**, **TS<sub>9-10<sup>R</sup></sub>**, **11<sup>R</sup>**, **TS<sub>2-12<sup>R</sup></sub>**, and **12<sup>R</sup>** (R= Ir, Ph, Ir\_Ph, and Ir\_Ph\_tBu) are optimized in gas phase at the level of  $\omega$ B97XD/BS4 (LANL2DZ for Co and 6-31G\* for the others). On the basis of gas-phase optimized geometries, single point calculations were conducted in C<sub>6</sub>H<sub>6</sub> solvent with the SMD solvent model at the level of  $\omega$ B97XD/Def2TZVP, where all the atoms use Def2TZVP. Absolute values (in Hartree) of the SCF energy in C<sub>6</sub>H<sub>6</sub> solvent and the SCF energy in gas phase together with the thermal correction to Enthalpy and the thermal correction to Gibbs Free Energy in gas phase, are also provided. The free energy in gas phase is obtained by adding the thermal correction to Gibbs Free Energy in gas phase to the SCF energy in gas phase. The free energy in C<sub>6</sub>H<sub>6</sub> solvent is obtained by adding the thermal correction to Gibbs Free Energy in gas phase to the SCF energy in C<sub>6</sub>H<sub>6</sub> solvent. The enthalpy in C<sub>6</sub>H<sub>6</sub> solvent is obtained by adding the thermal correction to Enthalpy in gas phase to the SCF energy in C<sub>6</sub>H<sub>6</sub> solvent.

|                                                                |    |           |          |           |
|----------------------------------------------------------------|----|-----------|----------|-----------|
| <b>1</b>                                                       | P  | 2.223692  | 0.037766 | 0.175692  |
| SCF energy in gas phase: -2076.00426346                        | Si | -0.621729 | 3.094442 | -0.583968 |
| Thermal correction to Enthalpy in gas phase: 0.686681          | C  | -0.808294 | 2.386803 | -2.332144 |
| Thermal correction to Gibbs Free Energy in gas phase: 0.582099 | C  | 0.631285  | 4.504019 | -0.700896 |
| SCF energy in solvent: -3314.13141551                          | C  | -2.295849 | 3.894420 | -0.225153 |
| Co 0.073950 -0.021061 0.157569                                 | H  | -0.092926 | 1.589479 | -2.540192 |
| N 0.338115 -1.906709 -0.441020                                 | H  | -0.680069 | 3.169637 | -3.084917 |
| C -0.116505 1.890928 0.739962                                  | H  | -1.805946 | 1.965259 | -2.470705 |
| P -2.021745 -0.549871 0.359950                                 | H  | 0.696900  | 5.032048 | 0.253920  |
|                                                                | H  | 0.356397  | 5.229693 | -1.470884 |
|                                                                | H  | 1.629935  | 4.130154 | -0.938010 |

|   |           |           |           |                          |               |           |           |
|---|-----------|-----------|-----------|--------------------------|---------------|-----------|-----------|
| H | -3.099136 | 3.153508  | -0.229952 | H                        | -1.374353     | -4.806757 | -0.731899 |
| H | -2.538179 | 4.645950  | -0.981545 | C                        | 0.664262      | -4.524972 | -1.401246 |
| H | -2.303934 | 4.383833  | 0.751906  | H                        | 2.678246      | -3.885330 | -1.868456 |
| H | -0.848304 | 1.989350  | 1.551120  | H                        | -5.250205     | -0.590735 | -1.720492 |
| H | 0.812016  | 2.296164  | 1.165838  | H                        | -5.141609     | -0.409284 | 0.041001  |
| C | -0.659392 | -2.820656 | -0.340279 | H                        | -4.617399     | -1.919955 | -0.735758 |
| C | 1.520756  | -2.320106 | -0.964352 | H                        | -2.570284     | -1.878311 | -2.346231 |
| C | -3.220253 | -0.258820 | -1.027634 | H                        | -1.564921     | -0.414025 | -2.453228 |
| C | -3.007020 | -0.226481 | 1.896958  | H                        | -3.186583     | -0.446892 | -3.198341 |
| C | -1.902792 | -2.388990 | 0.382319  | H                        | -4.233548     | 1.302642  | 2.826050  |
| C | 2.646761  | -1.321499 | -0.990136 | H                        | -4.297286     | 1.349760  | 1.053241  |
| C | 3.292996  | 1.448630  | -0.369154 | H                        | -2.862543     | 1.954351  | 1.902920  |
| C | 2.997001  | -0.498621 | 1.772084  | H                        | -1.284528     | 0.295630  | 3.122055  |
| C | -0.533161 | -4.119393 | -0.826097 | H                        | -1.682844     | -1.431624 | 3.181675  |
| C | 1.709152  | -3.611319 | -1.450457 | H                        | -2.705539     | -0.268014 | 4.050261  |
| H | -3.285119 | 0.840684  | -1.095972 | H                        | 3.425402      | 2.812544  | -2.056438 |
| C | -4.630394 | -0.822727 | -0.839657 | H                        | 1.902162      | 1.896779  | -2.002449 |
| C | -2.595627 | -0.775964 | -2.329379 | H                        | 3.409370      | 1.105924  | -2.528537 |
| H | -3.819210 | -0.974295 | 1.922757  | H                        | 5.164084      | 0.366601  | -0.712038 |
| C | -3.633750 | 1.171263  | 1.911612  | H                        | 5.077378      | 1.147661  | 0.885792  |
| C | -2.118673 | -0.422227 | 3.130720  | H                        | 5.345603      | 2.126528  | -0.567379 |
| H | -1.799517 | -2.687460 | 1.437685  | H                        | 2.814495      | -2.098084 | 3.229956  |
| H | -2.790128 | -2.906881 | -0.009030 | H                        | 2.512016      | -2.634892 | 1.563107  |
| H | 2.699641  | -0.871942 | -1.993644 | H                        | 1.280677      | -1.674074 | 2.413784  |
| H | 3.610809  | -1.818153 | -0.801191 | H                        | 1.770842      | 0.834240  | 2.978130  |
| H | 2.953898  | 2.282077  | 0.269774  | H                        | 3.334013      | 1.544071  | 2.520295  |
| C | 2.982641  | 1.832839  | -1.818701 | H                        | 3.272267      | 0.292259  | 3.780171  |
| C | 4.798669  | 1.255775  | -0.171818 | H                        | 0.786223      | -5.537850 | -1.787708 |
| H | 4.070342  | -0.679202 | 1.592843  | <b>2</b>                 |               |           |           |
| C | 2.365023  | -1.802732 | 2.268492  | SCF energy in gas phase: | -3277.8139751 |           |           |
| C | 2.836988  | 0.608487  | 2.819020  |                          |               |           |           |

Thermal correction to Enthalpy in gas phase: 0.748302

Thermal correction to Gibbs Free Energy in gas phase: 0.642266

SCF energy in solvent: -3278.05932703

|    |           |           |           |
|----|-----------|-----------|-----------|
| Co | 0.000000  | 0.000000  | 0.438563  |
| P  | 0.515527  | 2.069819  | 0.618184  |
| B  | 0.000000  | 0.000000  | -1.475525 |
| H  | -1.451855 | 0.437685  | 0.299558  |
| P  | -0.515527 | -2.069819 | 0.618184  |
| H  | 1.451855  | -0.437685 | 0.299558  |
| N  | 0.000000  | 0.000000  | 2.486598  |
| O  | -0.328465 | -1.082348 | -2.305115 |
| O  | 0.328465  | 1.082348  | -2.305115 |
| C  | 0.020888  | -0.779193 | -3.655041 |
| C  | -0.020888 | 0.779193  | -3.655041 |
| C  | 0.973420  | 1.447729  | -4.588311 |
| C  | -1.421943 | 1.333948  | -3.903364 |
| C  | -0.973420 | -1.447729 | -4.588311 |
| C  | 1.421943  | -1.333948 | -3.903364 |
| H  | -0.866725 | -2.531716 | -4.521930 |
| H  | -0.793107 | -1.152288 | -5.624539 |
| H  | -1.998044 | -1.192178 | -4.323953 |
| H  | 2.151074  | -0.856491 | -3.247107 |
| H  | 1.736094  | -1.193562 | -4.939071 |
| H  | 1.420539  | -2.402406 | -3.683984 |
| H  | 0.866725  | 2.531716  | -4.521930 |
| H  | 0.793107  | 1.152288  | -5.624539 |
| H  | 1.998044  | 1.192178  | -4.323953 |
| H  | -2.151074 | 0.856491  | -3.247107 |
| H  | -1.736094 | 1.193562  | -4.939071 |

|   |           |           |           |
|---|-----------|-----------|-----------|
| H | -1.420539 | 2.402406  | -3.683984 |
| C | -0.083036 | 2.416408  | 2.330842  |
| C | 2.306502  | 2.528869  | 0.690768  |
| C | -0.240083 | 3.438095  | -0.372431 |
| C | -2.306502 | -2.528869 | 0.690768  |
| C | 0.240083  | -3.438095 | -0.372431 |
| C | 0.083036  | -2.416408 | 2.330842  |
| C | -0.020228 | 1.163352  | 3.160625  |
| C | 0.020228  | -1.163352 | 3.160625  |
| H | 0.431980  | 3.250678  | 2.829093  |
| H | -1.143645 | 2.697750  | 2.223019  |
| H | 2.366208  | 3.601660  | 0.937535  |
| C | 2.968241  | 2.287933  | -0.669043 |
| C | 3.028547  | 1.743222  | 1.789474  |
| H | 0.269483  | 3.348661  | -1.343711 |
| C | 0.000000  | 4.841021  | 0.194479  |
| C | -1.731288 | 3.200203  | -0.618337 |
| H | -2.366208 | -3.601660 | 0.937535  |
| C | -2.968241 | -2.287933 | -0.669043 |
| C | -3.028547 | -1.743222 | 1.789474  |
| H | -0.269483 | -3.348661 | -1.343711 |
| C | 0.000000  | -4.841021 | 0.194479  |
| C | 1.731288  | -3.200203 | -0.618337 |
| H | -0.431980 | -3.250678 | 2.829093  |
| H | 1.143645  | -2.697750 | 2.223019  |
| C | -0.013483 | 1.197092  | 4.554024  |
| C | 0.013483  | -1.197092 | 4.554024  |
| H | 4.033816  | 2.563229  | -0.624661 |
| H | 2.497908  | 2.870780  | -1.474030 |
| H | 2.890403  | 1.224514  | -0.942154 |
| H | 2.921261  | 0.661118  | 1.617043  |

|                                                       |                |           |           |    |           |           |           |
|-------------------------------------------------------|----------------|-----------|-----------|----|-----------|-----------|-----------|
| H                                                     | 2.640173       | 1.971863  | 2.794039  | Co | 0.469674  | 0.018835  | -0.044825 |
| H                                                     | 4.101361       | 1.992697  | 1.785889  | P  | 0.528491  | 2.143611  | 0.131536  |
| H                                                     | -0.432906      | 5.595388  | -0.481535 | B  | -1.439790 | -0.054768 | -0.074696 |
| H                                                     | 1.066670       | 5.080561  | 0.308486  | H  | 0.111304  | -0.040368 | -1.521974 |
| H                                                     | -0.484879      | 4.971119  | 1.175775  | P  | 0.720973  | -2.109544 | 0.017228  |
| H                                                     | -2.312100      | 3.249066  | 0.317682  | H  | 0.542098  | 0.033553  | 1.467699  |
| H                                                     | -1.908677      | 2.215674  | -1.066175 | N  | 2.501918  | 0.099319  | -0.301347 |
| H                                                     | -2.125938      | 3.977979  | -1.291856 | O  | -2.215550 | -1.196470 | 0.174733  |
| H                                                     | -4.033816      | -2.563229 | -0.624661 | O  | -2.318639 | 0.992537  | -0.389159 |
| H                                                     | -2.497908      | -2.870780 | -1.474030 | C  | -3.594726 | -0.842702 | 0.244525  |
| H                                                     | -2.890403      | -1.224514 | -0.942154 | C  | -3.634877 | 0.479364  | -0.583837 |
| H                                                     | -2.921261      | -0.661118 | 1.617043  | C  | -4.646712 | 1.505031  | -0.101921 |
| H                                                     | -2.640173      | -1.971863 | 2.794039  | C  | -3.813732 | 0.238681  | -2.081489 |
| H                                                     | -4.101361      | -1.992697 | 1.785889  | C  | -4.427339 | -1.979407 | -0.323482 |
| H                                                     | 0.432906       | -5.595388 | -0.481535 | C  | -3.935951 | -0.634564 | 1.718601  |
| H                                                     | -1.066670      | -5.080561 | 0.308486  | H  | -4.338144 | -2.855775 | 0.320627  |
| H                                                     | 0.484879       | -4.971119 | 1.175775  | H  | -5.482818 | -1.702323 | -0.374614 |
| H                                                     | 2.312100       | -3.249066 | 0.317682  | H  | -4.089444 | -2.255950 | -1.321014 |
| H                                                     | 1.908677       | -2.215674 | -1.066175 | H  | -3.348811 | 0.181479  | 2.142150  |
| H                                                     | 2.125938       | -3.977979 | -1.291856 | H  | -4.995623 | -0.418462 | 1.865353  |
| H                                                     | -0.027931      | 2.156862  | 5.070984  | H  | -3.687552 | -1.544477 | 2.266156  |
| C                                                     | 0.000000       | 0.000000  | 5.260324  | H  | -4.599933 | 2.391506  | -0.736419 |
| H                                                     | 0.027931       | -2.156862 | 5.070984  | H  | -5.661397 | 1.103560  | -0.154083 |
| H                                                     | 0.000000       | 0.000000  | 6.351622  | H  | -4.444559 | 1.812143  | 0.922733  |
| <b>TS<sub>2-3</sub></b>                               |                |           |           | H  | -3.098254 | -0.499337 | -2.445817 |
| SCF energy in gas phase:                              | -3277.80827876 |           |           | H  | -4.822870 | -0.101184 | -2.321170 |
| Thermal correction to Enthalpy in gas phase:          | 0.747808       |           |           | H  | -3.628289 | 1.174413  | -2.610169 |
| Thermal correction to Gibbs Free Energy in gas phase: | 0.643816       |           |           | C  | 2.350276  | 2.496898  | 0.132582  |
| SCF energy in solvent:                                | -3278.0540076  |           |           | C  | -0.008179 | 3.033755  | 1.668949  |
|                                                       |                |           |           | C  | -0.109441 | 3.225625  | -1.232277 |
|                                                       |                |           |           | C  | -0.302051 | -3.333410 | -0.926107 |

|   |           |           |           |                                         |                |           |           |
|---|-----------|-----------|-----------|-----------------------------------------|----------------|-----------|-----------|
| C | 0.934874  | -2.920730 | 1.665826  | H                                       | 1.563506       | 3.036261  | -2.636745 |
| C | 2.381563  | -2.279351 | -0.770694 | H                                       | 0.378411       | 1.706447  | -2.718882 |
| C | 3.160798  | 1.262438  | -0.167087 | H                                       | -0.013916      | 3.314280  | -3.399517 |
| C | 3.190390  | -1.027974 | -0.564078 | H                                       | -1.363791      | -3.514450 | -2.805926 |
| H | 2.648292  | 2.886443  | 1.117424  | H                                       | -1.156199      | -1.825372 | -2.252775 |
| H | 2.600071  | 3.285374  | -0.593335 | H                                       | 0.209243       | -2.704649 | -2.964149 |
| H | 0.413574  | 4.049852  | 1.577081  | H                                       | 1.250262       | -4.726068 | -1.603963 |
| C | -1.531579 | 3.145389  | 1.775672  | H                                       | 0.519422       | -5.183717 | -0.046104 |
| C | 0.556099  | 2.400548  | 2.942796  | H                                       | -0.384075      | -5.407783 | -1.552693 |
| H | -1.182209 | 2.976270  | -1.251161 | H                                       | 2.182376       | -2.769709 | 3.434300  |
| C | 0.060256  | 4.732167  | -1.020778 | H                                       | 3.063377       | -2.428947 | 1.930697  |
| C | 0.489631  | 2.789531  | -2.572425 | H                                       | 1.928469       | -1.218620 | 2.583785  |
| H | -1.230216 | -3.386888 | -0.337488 | H                                       | -0.641553      | -1.769043 | 2.612249  |
| C | -0.675360 | -2.808581 | -2.314216 | H                                       | -1.208581      | -3.314677 | 1.952682  |
| C | 0.311084  | -4.733982 | -1.027059 | H                                       | -0.243604      | -3.300410 | 3.451216  |
| H | 1.172476  | -3.981929 | 1.486204  | H                                       | 5.052087       | 2.291199  | -0.162200 |
| C | 2.097571  | -2.297262 | 2.442939  | C                                       | 5.270260       | 0.169861  | -0.528841 |
| C | -0.367805 | -2.825122 | 2.465405  | H                                       | 5.104344       | -1.960866 | -0.877839 |
| H | 2.188087  | -2.376611 | -1.851973 | H                                       | 6.358015       | 0.197445  | -0.611805 |
| H | 2.940339  | -3.172803 | -0.456182 | <b>3</b>                                |                |           |           |
| C | 4.549803  | 1.330458  | -0.279915 | SCF energy in gas phase:                | -3277.81055591 |           |           |
| C | 4.579080  | -1.027587 | -0.673580 | Thermal correction to Enthalpy in gas   |                |           |           |
| H | -1.800068 | 3.757102  | 2.651444  | phase:                                  | 0.748313       |           |           |
| H | -1.991509 | 3.597998  | 0.886211  | Thermal correction to Gibbs Free Energy |                |           |           |
| H | -1.980000 | 2.149297  | 1.897461  | in gas phase:                           | 0.64127        |           |           |
| H | 0.121572  | 1.403750  | 3.102644  | SCF energy in solvent:                  | -3278.05554021 |           |           |
| H | 1.649041  | 2.275204  | 2.912952  | Co                                      | 0.440752       | 0.007581  | -0.183906 |
| H | 0.315552  | 3.036378  | 3.809981  | P                                       | 0.586805       | 2.138448  | 0.010283  |
| H | -0.314898 | 5.278734  | -1.900707 | B                                       | -1.464152      | -0.013435 | -0.061786 |
| H | -0.491219 | 5.104777  | -0.146018 | H                                       | -0.001324      | 0.013444  | -1.641645 |
| H | 1.119880  | 5.013045  | -0.896260 | P                                       | 0.641716       | -2.125002 | -0.063464 |

|   |           |           |           |   |           |           |           |
|---|-----------|-----------|-----------|---|-----------|-----------|-----------|
| H | 0.565471  | -0.013514 | 1.323123  | H | 2.208018  | 2.666853  | -1.670453 |
| N | 2.476503  | 0.036839  | -0.492208 | H | 0.727016  | 3.958446  | 1.592370  |
| O | -2.279158 | -1.153438 | 0.013187  | C | -0.739410 | 2.607015  | 2.414233  |
| O | -2.307354 | 1.108111  | -0.057488 | C | 1.760877  | 2.341159  | 2.551656  |
| C | -3.624910 | -0.767523 | 0.288781  | H | -1.374895 | 3.370782  | -0.433684 |
| C | -3.657795 | 0.693367  | -0.253781 | C | 0.162216  | 4.785916  | -0.980954 |
| C | -4.582574 | 1.636143  | 0.495986  | C | -0.665909 | 2.861447  | -2.381835 |
| C | -3.944626 | 0.763465  | -1.752435 | H | -1.300464 | -3.402766 | -0.462891 |
| C | -4.570152 | -1.731402 | -0.406763 | C | -0.707355 | -2.799115 | -2.421947 |
| C | -3.824602 | -0.839568 | 1.801240  | C | 0.253997  | -4.742561 | -1.137720 |
| H | -4.479067 | -2.722133 | 0.041565  | H | 0.917891  | -3.992112 | 1.444803  |
| H | -5.607166 | -1.404855 | -0.299527 | C | 1.916195  | -2.364041 | 2.423583  |
| H | -4.337462 | -1.816966 | -1.466917 | C | -0.573657 | -2.736271 | 2.366369  |
| H | -3.154064 | -0.148258 | 2.313892  | H | 2.215231  | -2.506783 | -1.825898 |
| H | -4.852788 | -0.609080 | 2.085528  | H | 2.859390  | -3.255653 | -0.352772 |
| H | -3.590584 | -1.849192 | 2.140128  | C | 4.533455  | 1.249400  | -0.404854 |
| H | -4.538114 | 2.628643  | 0.044515  | C | 4.554262  | -1.143453 | -0.486143 |
| H | -5.616727 | 1.287457  | 0.446547  | H | -0.743584 | 3.081959  | 3.407965  |
| H | -4.293154 | 1.726188  | 1.541641  | H | -1.596644 | 2.991118  | 1.843377  |
| H | -3.289362 | 0.088462  | -2.305180 | H | -0.887633 | 1.523633  | 2.542003  |
| H | -4.982072 | 0.512627  | -1.980234 | H | 1.699840  | 1.246371  | 2.644649  |
| H | -3.749748 | 1.779116  | -2.099074 | H | 2.742044  | 2.592974  | 2.120669  |
| C | 2.304839  | 2.448423  | -0.593400 | H | 1.722826  | 2.777578  | 3.562234  |
| C | 0.595508  | 2.870599  | 1.711759  | H | -0.529178 | 5.457512  | -1.514366 |
| C | -0.408386 | 3.364192  | -0.960138 | H | 0.311739  | 5.205802  | 0.023978  |
| C | -0.361486 | -3.343213 | -1.034466 | H | 1.126432  | 4.829138  | -1.513183 |
| C | 0.743817  | -2.915947 | 1.608240  | H | 0.268446  | 2.791757  | -2.963938 |
| C | 2.343368  | -2.365362 | -0.739289 | H | -1.124431 | 1.865595  | -2.371647 |
| C | 3.141914  | 1.204822  | -0.473612 | H | -1.332177 | 3.561362  | -2.911583 |
| C | 3.162103  | -1.118296 | -0.550093 | H | -1.355689 | -3.515074 | -2.952140 |
| H | 2.793685  | 3.317144  | -0.130223 | H | -1.222277 | -1.833860 | -2.350046 |

|                                                               |           |           |           |   |           |           |           |
|---------------------------------------------------------------|-----------|-----------|-----------|---|-----------|-----------|-----------|
| H                                                             | 0.195050  | -2.649720 | -3.037981 | C | 3.738047  | 0.495734  | -0.273260 |
| H                                                             | 1.185513  | -4.733115 | -1.726730 | C | 4.607741  | 1.353962  | 0.629498  |
| H                                                             | 0.477781  | -5.189138 | -0.158345 | C | 4.215489  | 0.608491  | -1.720309 |
| H                                                             | -0.444936 | -5.420709 | -1.652564 | C | 4.580970  | -1.955590 | -0.390919 |
| H                                                             | 1.931038  | -2.830239 | 3.421379  | C | 3.532805  | -1.117510 | 1.712630  |
| H                                                             | 2.890441  | -2.564106 | 1.951883  | H | 4.390087  | -2.959028 | -0.006822 |
| H                                                             | 1.815661  | -1.275582 | 2.551143  | H | 5.597682  | -1.672212 | -0.108794 |
| H                                                             | -0.776488 | -1.665660 | 2.521105  | H | 4.515269  | -1.990494 | -1.477075 |
| H                                                             | -1.429202 | -3.158041 | 1.819958  | H | 2.811741  | -0.421689 | 2.144733  |
| H                                                             | -0.515425 | -3.229535 | 3.349435  | H | 4.511233  | -0.934957 | 2.160085  |
| H                                                             | 5.042237  | 2.212845  | -0.366221 | H | 3.219154  | -2.129982 | 1.968890  |
| C                                                             | 5.248438  | 0.057256  | -0.390793 | H | 4.675631  | 2.363953  | 0.221521  |
| H                                                             | 5.079687  | -2.098341 | -0.512056 | H | 5.619459  | 0.947374  | 0.697614  |
| H                                                             | 6.337668  | 0.064474  | -0.324359 | H | 4.187987  | 1.421447  | 1.631873  |
| <b>TS<sub>3-4</sub></b>                                       |           |           |           | H | 3.610875  | -0.018895 | -2.376862 |
| SCF energy in gas phase: -3277.80523291                       |           |           |           | H | 5.263510  | 0.323065  | -1.827778 |
| Thermal correction to Enthalpy in gas phase: 0.747244         |           |           |           | H | 4.103852  | 1.644088  | -2.044684 |
| Thermal correction to Gibbs Free Energy in gas phase: 0.64068 |           |           |           | C | -2.146703 | 2.609861  | -0.547377 |
| SCF energy in solvent: -3278.04891911                         |           |           |           | C | -0.431094 | 2.842370  | 1.771435  |
| Co                                                            | -0.422058 | 0.023379  | -0.230629 | C | 0.616370  | 3.356694  | -0.881201 |
| P                                                             | -0.460779 | 2.168403  | 0.049498  | C | 0.124725  | -3.421235 | -0.898569 |
| B                                                             | 1.510899  | -0.115164 | -0.372552 | C | -1.102417 | -2.793404 | 1.656425  |
| H                                                             | 0.611995  | -0.056334 | -1.459856 | C | -2.505057 | -2.217374 | -0.798731 |
| P                                                             | -0.835077 | -2.093578 | -0.034679 | C | -3.043434 | 1.405555  | -0.528863 |
| H                                                             | 0.181599  | -0.054762 | 1.137068  | C | -3.218682 | -0.903651 | -0.661526 |
| N                                                             | -2.436993 | 0.197381  | -0.573973 | H | -2.597902 | 3.455439  | -0.008522 |
| O                                                             | 2.275148  | -1.301905 | -0.308375 | H | -2.031411 | 2.922635  | -1.598474 |
| O                                                             | 2.400018  | 0.973087  | -0.220118 | H | -0.685820 | 3.913165  | 1.704710  |
| C                                                             | 3.569238  | -0.983800 | 0.190908  | C | 0.963150  | 2.693672  | 2.385603  |
|                                                               |           |           |           | C | -1.484514 | 2.151530  | 2.639016  |
|                                                               |           |           |           | H | 1.607633  | 3.193995  | -0.434031 |

|   |           |           |           |                                         |                |           |           |
|---|-----------|-----------|-----------|-----------------------------------------|----------------|-----------|-----------|
| C | 0.227716  | 4.830072  | -0.731087 | H                                       | -3.116329      | -1.958768 | 1.942532  |
| C | 0.722439  | 2.960756  | -2.355896 | H                                       | -1.790338      | -0.916315 | 2.503349  |
| H | 1.103453  | -3.381055 | -0.397335 | H                                       | 0.673931       | -1.871113 | 2.497283  |
| C | 0.365971  | -3.063117 | -2.367657 | H                                       | 0.952063       | -3.526833 | 1.912153  |
| C | -0.459678 | -4.830233 | -0.766149 | H                                       | 0.061311       | -3.265522 | 3.430579  |
| H | -1.508792 | -3.810279 | 1.529096  | H                                       | -4.866724      | 2.537423  | -0.436480 |
| C | -2.128058 | -1.959951 | 2.427526  | C                                       | -5.230280      | 0.406167  | -0.538472 |
| C | 0.223833  | -2.872597 | 2.414731  | H                                       | -5.191645      | -1.752729 | -0.691953 |
| H | -2.336886 | -2.400998 | -1.872680 | H                                       | -6.317650      | 0.486499  | -0.503361 |
| H | -3.113360 | -3.048385 | -0.413925 | <b>4</b>                                |                |           |           |
| C | -4.429012 | 1.540472  | -0.495431 | SCF energy in gas phase:                | -3277.81223238 |           |           |
| C | -4.608929 | -0.832754 | -0.637412 | Thermal correction to Enthalpy in gas   |                |           |           |
| H | 0.958954  | 3.048471  | 3.428190  | phase:                                  | 0.750591       |           |           |
| H | 1.725546  | 3.264035  | 1.835533  | Thermal correction to Gibbs Free Energy |                |           |           |
| H | 1.269701  | 1.635716  | 2.378095  | in gas phase:                           | 0.642644       |           |           |
| H | -1.246990 | 1.082860  | 2.737747  | SCF energy in solvent:                  | -3278.05703093 |           |           |
| H | -2.498542 | 2.232812  | 2.217003  | Co                                      | 0.436260       | -0.040651 | -0.220072 |
| H | -1.502923 | 2.600929  | 3.644459  | P                                       | 0.399372       | -2.163803 | 0.209074  |
| H | 0.922100  | 5.460757  | -1.308955 | B                                       | -1.610295      | 0.197349  | -0.492538 |
| H | 0.267400  | 5.175229  | 0.311915  | H                                       | -0.757028      | 0.111700  | -1.481186 |
| H | -0.785859 | 5.029475  | -1.116556 | P                                       | 1.011843       | 2.034287  | 0.067991  |
| H | -0.238219 | 3.080464  | -2.885134 | H                                       | -0.810028      | 0.165346  | 0.672983  |
| H | 1.041253  | 1.916437  | -2.465854 | N                                       | 2.342488       | -0.308105 | -0.748669 |
| H | 1.455261  | 3.607430  | -2.864267 | O                                       | -2.358949      | 1.417249  | -0.500565 |
| H | 1.070581  | -3.782601 | -2.813483 | O                                       | -2.557301      | -0.872166 | -0.356902 |
| H | 0.787391  | -2.055253 | -2.470669 | C                                       | -3.645468      | 1.138945  | 0.025015  |
| H | -0.563774 | -3.110352 | -2.959354 | C                                       | -3.867143      | -0.337034 | -0.433415 |
| H | -1.477528 | -4.892618 | -1.185683 | C                                       | -4.788929      | -1.149578 | 0.461663  |
| H | -0.500620 | -5.176757 | 0.276298  | C                                       | -4.335839      | -0.430606 | -1.885657 |
| H | 0.164229  | -5.547271 | -1.323208 | C                                       | -4.640969      | 2.138681  | -0.538151 |
| H | -2.256876 | -2.362118 | 3.444815  | C                                       | -3.582366      | 1.271329  | 1.548348  |

|   |           |           |           |   |           |           |           |
|---|-----------|-----------|-----------|---|-----------|-----------|-----------|
| H | -4.418056 | 3.136242  | -0.155407 | H | 2.060961  | 3.581363  | 1.623487  |
| H | -5.660905 | 1.881438  | -0.242595 | C | 2.838570  | 1.647711  | 2.143716  |
| H | -4.588493 | 2.173960  | -1.625046 | C | 0.541488  | 2.522206  | 2.737566  |
| H | -2.892213 | 0.541677  | 1.975180  | H | 2.058882  | 2.281360  | -2.059938 |
| H | -4.561492 | 1.138031  | 2.011674  | H | 3.187981  | 2.906286  | -0.836798 |
| H | -3.216055 | 2.268788  | 1.797005  | C | 4.287121  | -1.713449 | -0.928867 |
| H | -4.896173 | -2.158548 | 0.059285  | C | 4.496192  | 0.630907  | -1.282509 |
| H | -5.782576 | -0.698014 | 0.513265  | H | -1.088578 | -2.764573 | 3.609181  |
| H | -4.386430 | -1.229031 | 1.470541  | H | -1.803168 | -3.193503 | 2.037025  |
| H | -3.701008 | 0.175177  | -2.533613 | H | -1.409645 | -1.499118 | 2.390397  |
| H | -5.371809 | -0.107024 | -2.003983 | H | 1.080219  | -0.871411 | 2.834329  |
| H | -4.259128 | -1.469679 | -2.209393 | H | 2.378954  | -2.001815 | 2.397216  |
| C | 2.051685  | -2.714156 | -0.388304 | H | 1.383870  | -2.318776 | 3.838541  |
| C | 0.343413  | -2.719179 | 1.972615  | H | -1.207312 | -5.452609 | -0.891842 |
| C | -0.750530 | -3.346834 | -0.635459 | H | -0.590387 | -5.069717 | 0.724553  |
| C | -0.031166 | 3.470737  | -0.454914 | H | 0.521768  | -5.136339 | -0.663729 |
| C | 1.680254  | 2.551107  | 1.713653  | H | 0.161445  | -3.324448 | -2.635217 |
| C | 2.467724  | 2.103935  | -1.052970 | H | -1.014944 | -2.015070 | -2.342988 |
| C | 2.925162  | -1.530613 | -0.700495 | H | -1.574079 | -3.686774 | -2.612123 |
| C | 3.132507  | 0.758065  | -1.037653 | H | -1.236926 | 4.038044  | -2.163969 |
| H | 2.559090  | -3.390437 | 0.315659  | H | -0.695164 | 2.348777  | -2.216148 |
| H | 1.902084  | -3.287143 | -1.316944 | H | 0.449801  | 3.677687  | -2.581120 |
| H | 0.613966  | -3.788153 | 2.002053  | H | 1.531323  | 5.004915  | -0.576792 |
| C | -1.071410 | -2.538615 | 2.531485  | H | 0.618962  | 5.035840  | 0.953083  |
| C | 1.357898  | -1.935620 | 2.806047  | H | -0.127239 | 5.633930  | -0.538187 |
| H | -1.735095 | -3.061065 | -0.236982 | H | 3.148239  | 1.890134  | 3.172684  |
| C | -0.486732 | -4.825608 | -0.342669 | H | 3.719932  | 1.767764  | 1.495545  |
| C | -0.791997 | -3.070996 | -2.140632 | H | 2.540659  | 0.589070  | 2.111953  |
| H | -0.964233 | 3.309459  | 0.107332  | H | 0.111472  | 1.509702  | 2.803284  |
| C | -0.393131 | 3.367785  | -1.940810 | H | -0.274769 | 3.210612  | 2.468890  |
| C | 0.534944  | 4.854721  | -0.128115 | H | 0.909465  | 2.809537  | 3.735033  |

H 4.703070 -2.719444 -0.865632  
C 5.091402 -0.622696 -1.227886  
H 5.081093 1.523835 -1.504060  
H 6.160437 -0.745201 -1.407043

**TS<sub>4-5</sub>**

SCF energy in gas phase: -3277.79798424

Thermal correction to Enthalpy in gas phase: 0.749002

Thermal correction to Gibbs Free Energy in gas phase: 0.64364

SCF energy in solvent: -3278.04395796

Co -0.224844 -0.192831 -0.124826  
P -1.900988 -1.568086 -0.480965  
B 1.675064 -0.737163 0.083664  
H 0.568041 -1.288776 0.663512  
P 0.028558 1.927274 -0.365901  
H 0.479945 -0.500350 -1.392738  
N -1.226593 0.316909 1.534077  
O 2.579750 -0.024268 0.897744  
O 2.412605 -1.684818 -0.650726  
C 3.917633 -0.434352 0.599010  
C 3.690469 -1.838085 -0.045133  
C 4.705793 -2.227370 -1.105870  
C 3.578330 -2.953787 0.994938  
C 4.727899 -0.445473 1.884272  
C 4.527005 0.565455 -0.381366  
H 4.840816 0.573840 2.256865  
H 5.725327 -0.855319 1.708617  
H 4.238161 -1.035514 2.656726  
H 3.971535 0.583101 -1.319516  
H 5.569000 0.325209 -0.598092

H 4.494114 1.564075 0.057642  
H 4.470968 -3.221526 -1.488331  
H 5.714323 -2.253127 -0.686471  
H 4.690631 -1.532246 -1.943310  
H 2.864917 -2.688403 1.776618  
H 4.540709 -3.175901 1.459314  
H 3.215964 -3.855037 0.499142  
C -2.367541 -1.807010 1.304230  
C -3.560613 -1.184856 -1.230191  
C -1.604779 -3.305010 -1.069017  
C 1.641694 2.614251 -0.937103  
C -1.359790 2.960037 -1.051241  
C 0.011649 2.383992 1.425990  
C -2.159483 -0.512294 2.040787  
C -1.016053 1.522031 2.101126  
H -3.384359 -2.192722 1.472582  
H -1.657243 -2.552993 1.696506  
H -4.268493 -1.968265 -0.911000  
C -3.477789 -1.187473 -2.758515  
C -4.077330 0.158858 -0.711791  
H -1.481039 -3.179363 -2.158609  
C -2.753322 -4.286987 -0.820360  
C -0.280836 -3.855683 -0.531037  
H 2.315396 1.975154 -0.347430  
C 1.983832 4.068011 -0.602653  
C 1.891219 2.299172 -2.413915  
H -2.189607 2.614349 -0.406949  
C -1.688438 2.535651 -2.485649  
C -1.283683 4.483290 -0.929466  
H 1.010973 2.096170 1.793031  
H -0.151014 3.446808 1.655340

C -2.906037 -0.159303 3.164027  
C -1.736404 1.931602 3.220211  
H -4.429881 -0.849507 -3.197961  
H -3.264617 -2.189317 -3.160370  
H -2.683813 -0.509663 -3.111101  
H -3.380425 0.967581 -0.973420  
H -4.202210 0.165902 0.381900  
H -5.056269 0.392484 -1.160102  
H -2.496657 -5.279799 -1.223313  
H -3.693375 -3.974333 -1.297809  
H -2.946174 -4.414449 0.257544  
H -0.299966 -3.958512 0.567191  
H 0.567781 -3.209906 -0.791211  
H -0.100078 -4.859651 -0.947714  
H 3.063734 4.233297 -0.752057  
H 1.755822 4.326523 0.442345  
H 1.455672 4.781100 -1.250702  
H 1.278405 2.934131 -3.073343  
H 1.665566 1.246437 -2.640586  
H 2.946806 2.488856 -2.668184  
H -2.681107 2.907916 -2.786307  
H -1.680349 1.439969 -2.581193  
H -0.954177 2.941116 -3.198847  
H -0.591974 4.909001 -1.671096  
H -0.957538 4.817490 0.066780  
H -2.274446 4.927480 -1.119772  
H -3.657359 -0.848994 3.549041  
C -2.689483 1.076021 3.763103  
H -1.548779 2.914511 3.652360  
H -3.268104 1.375805 4.638452

5

SCF energy in gas phase: -3277.80387118  
Thermal correction to Enthalpy in gas phase: 0.750001  
Thermal correction to Gibbs Free Energy in gas phase: 0.644437  
SCF energy in solvent: -3278.05072196  
Co 0.357819 0.192429 -0.435375  
P 2.379511 1.048083 -0.491620  
B -1.447558 0.967717 -0.275006  
H -0.222918 1.633930 -0.384296  
P -0.363735 -1.801798 -0.322097  
H 0.162280 0.211063 -1.903799  
N 0.710018 0.005607 1.532367  
O -2.086040 1.190408 0.959714  
O -2.384284 1.138647 -1.298750  
C -3.486224 1.360509 0.748121  
C -3.550242 1.760941 -0.763435  
C -4.773074 1.250268 -1.506554  
C -3.402634 3.265799 -0.984353  
C -4.006632 2.417859 1.708692  
C -4.178966 0.031052 1.043873  
H -3.924364 2.053190 2.733652  
H -5.057594 2.639720 1.509011  
H -3.433594 3.339778 1.631754  
H -3.851567 -0.750438 0.358415  
H -5.264270 0.117126 0.971686  
H -3.927990 -0.276793 2.060463  
H -4.729930 1.575811 -2.546520  
H -5.690449 1.644166 -1.062914  
H -4.819125 0.162228 -1.496391  
H -2.528916 3.652008 -0.457427

|   |           |           |           |                                         |                |           |           |
|---|-----------|-----------|-----------|-----------------------------------------|----------------|-----------|-----------|
| H | -4.284954 | 3.815371  | -0.651656 | H                                       | 3.191412       | -1.741421 | 0.150337  |
| H | -3.260505 | 3.447928  | -2.049888 | H                                       | 3.722097       | -0.740243 | 1.517676  |
| C | 2.327055  | 1.772101  | 1.222331  | H                                       | 4.929007       | -1.553865 | 0.498264  |
| C | 4.023000  | 0.175460  | -0.459507 | H                                       | 4.108540       | 4.173836  | -1.863011 |
| C | 2.735435  | 2.515034  | -1.570553 | H                                       | 4.870134       | 2.773434  | -1.086413 |
| C | -1.908362 | -2.259041 | -1.233056 | H                                       | 3.772800       | 3.823853  | -0.157412 |
| C | 0.813077  | -3.243939 | -0.415285 | H                                       | 1.165105       | 3.844737  | -0.815803 |
| C | -0.856866 | -1.837221 | 1.462747  | H                                       | 0.649868       | 2.799013  | -2.154986 |
| C | 1.619050  | 0.799467  | 2.126195  | H                                       | 1.714070       | 4.204605  | -2.466936 |
| C | 0.097058  | -0.966013 | 2.233451  | H                                       | -3.779670      | -3.342632 | -1.155839 |
| H | 3.307042  | 2.051455  | 1.637281  | H                                       | -3.052569      | -3.109547 | 0.443001  |
| H | 1.719811  | 2.687798  | 1.138185  | H                                       | -2.391007      | -4.329570 | -0.667083 |
| H | 4.772404  | 0.880886  | -0.062294 | H                                       | -1.127350      | -3.544538 | -2.826816 |
| C | 4.449940  | -0.251839 | -1.866343 | H                                       | -0.943702      | -1.792542 | -3.135322 |
| C | 3.960307  | -1.029434 | 0.482998  | H                                       | -2.538351      | -2.570601 | -3.286592 |
| H | 2.959629  | 2.054247  | -2.547971 | H                                       | 2.559085       | -3.814157 | -1.590680 |
| C | 3.940121  | 3.357908  | -1.142201 | H                                       | 1.973707       | -2.150602 | -1.897385 |
| C | 1.491105  | 3.386047  | -1.764033 | H                                       | 1.097670       | -3.543774 | -2.563922 |
| H | -2.445193 | -1.297306 | -1.221894 | H                                       | -0.339709      | -4.989514 | -1.041550 |
| C | -2.820816 | -3.320028 | -0.612069 | H                                       | -0.373830      | -4.714565 | 0.716565  |
| C | -1.604102 | -2.559086 | -2.703625 | H                                       | 1.084555       | -5.369090 | -0.058082 |
| H | 1.480000  | -3.000218 | 0.433033  | H                                       | 2.652698       | 1.330472  | 3.939185  |
| C | 1.660448  | -3.183844 | -1.689675 | C                                       | 1.269030       | -0.311669 | 4.223804  |
| C | 0.258302  | -4.650082 | -0.182013 | H                                       | -0.145075      | -1.949411 | 4.132657  |
| H | -1.850579 | -1.366901 | 1.509792  | H                                       | 1.488462       | -0.436377 | 5.285557  |
| H | -0.931972 | -2.837361 | 1.912885  | <b>TS<sub>5-6</sub></b>                 |                |           |           |
| C | 1.913098  | 0.672749  | 3.482328  | SCF energy in gas phase:                | -3277.79540123 |           |           |
| C | 0.359747  | -1.150741 | 3.589030  | Thermal correction to Enthalpy in gas   |                |           |           |
| H | 5.355794  | -0.877023 | -1.819221 | phase:                                  | 0.749033       |           |           |
| H | 4.677111  | 0.609924  | -2.511214 | Thermal correction to Gibbs Free Energy |                |           |           |
| H | 3.661267  | -0.841760 | -2.359647 | in gas phase:                           | 0.643816       |           |           |

|                                       |   |           |           |           |
|---------------------------------------|---|-----------|-----------|-----------|
| SCF energy in solvent: -3278.04063231 | C | 1.500631  | 2.870148  | -1.179217 |
| Co -0.464010 0.097548 -0.620612       | C | -1.109227 | 3.336562  | 0.263377  |
| P -2.268547 -1.115234 -0.502782       | C | 1.000934  | 1.781422  | 1.461875  |
| B 1.380478 -0.838090 -0.781740        | C | -0.946889 | -1.316186 | 1.879859  |
| H 0.314189 -0.970558 -1.511015        | C | 0.339316  | 0.611336  | 2.139149  |
| P 0.176777 2.060760 -0.168731         | H | -2.527110 | -2.716354 | 1.437705  |
| H -0.759664 0.610661 -1.997654        | H | -1.028300 | -2.914019 | 0.488058  |
| N -0.325005 -0.249303 1.339922        | H | -4.500814 | -1.385080 | 0.445510  |
| O 1.661329 -1.947634 0.017942         | C | -4.703020 | 0.148621  | -1.057706 |
| O 2.572318 -0.267131 -1.215775        | C | -3.749472 | 0.458720  | 1.253706  |
| C 3.056727 -1.972267 0.314498         | H | -3.254155 | -1.762670 | -2.557577 |
| C 3.659065 -1.129590 -0.861353        | C | -3.693921 | -3.462451 | -1.313208 |
| C 4.860929 -0.280734 -0.485323        | C | -1.496010 | -2.967341 | -2.456671 |
| C 3.982067 -1.972116 -2.092559        | H | 2.124093  | 1.993092  | -1.416876 |
| C 3.524546 -3.417435 0.363999         | C | 2.398948  | 3.910431  | -0.502869 |
| C 3.254443 -1.332135 1.686274         | C | 0.929316  | 3.396990  | -2.498694 |
| H 3.058892 -3.921901 1.211758         | H | -1.577481 | 2.849053  | 1.139167  |
| H 4.608231 -3.469359 0.490595         | C | -2.181253 | 3.433616  | -0.825742 |
| H 3.251698 -3.955402 -0.541804        | C | -0.633317 | 4.722951  | 0.700153  |
| H 2.977323 -0.279579 1.678762         | H | 2.038720  | 1.504486  | 1.213129  |
| H 4.288902 -1.413874 2.023733         | H | 1.047827  | 2.651257  | 2.133080  |
| H 2.609500 -1.839740 2.404904         | C | -0.896282 | -1.572593 | 3.248152  |
| H 5.207028 0.271597 -1.359785         | C | 0.410063  | 0.414986  | 3.515880  |
| H 5.681950 -0.908094 -0.131374        | H | -5.625872 | 0.614202  | -0.676660 |
| H 4.613082 0.439751 0.292726          | H | -4.994287 | -0.571822 | -1.836385 |
| H 3.127066 -2.585436 -2.379433        | H | -4.100979 | 0.937436  | -1.536488 |
| H 4.840811 -2.623669 -1.922969        | H | -3.126201 | 1.312836  | 0.949639  |
| H 4.211707 -1.304183 -2.923064        | H | -3.266213 | -0.014373 | 2.121805  |
| C -1.721176 -2.173965 0.921231        | H | -4.727357 | 0.843318  | 1.584545  |
| C -3.928313 -0.513694 0.084825        | H | -3.969123 | -4.120987 | -2.152561 |
| C -2.737769 -2.366148 -1.791782       | H | -4.627182 | -3.057934 | -0.894706 |

|                                                       |                |           |           |   |           |           |           |
|-------------------------------------------------------|----------------|-----------|-----------|---|-----------|-----------|-----------|
| H                                                     | -3.223542      | -4.096122 | -0.543846 | P | -0.377521 | 2.216240  | -0.332431 |
| H                                                     | -0.860295      | -3.501219 | -1.731518 | H | -1.350028 | 0.434617  | -1.923480 |
| H                                                     | -0.880171      | -2.189347 | -2.925918 | N | -0.185663 | -0.074774 | 1.269936  |
| H                                                     | -1.797310      | -3.690875 | -3.231025 | O | 1.806716  | -1.819401 | -0.543881 |
| H                                                     | 3.248858       | 4.145395  | -1.164674 | O | 2.482393  | 0.344630  | -0.720201 |
| H                                                     | 2.821152       | 3.550242  | 0.447480  | C | 3.088492  | -1.763134 | 0.092895  |
| H                                                     | 1.873977       | 4.854536  | -0.301556 | C | 3.666735  | -0.407991 | -0.437690 |
| H                                                     | 0.347052       | 4.320353  | -2.346730 | C | 4.510049  | 0.361131  | 0.564538  |
| H                                                     | 0.277743       | 2.650523  | -2.976412 | C | 4.426052  | -0.554544 | -1.753534 |
| H                                                     | 1.746623       | 3.636814  | -3.197160 | C | 3.884857  | -2.993822 | -0.306650 |
| H                                                     | -3.072986      | 3.958672  | -0.446546 | C | 2.865340  | -1.769456 | 1.602124  |
| H                                                     | -2.474397      | 2.430972  | -1.168140 | H | 3.412094  | -3.884636 | 0.109124  |
| H                                                     | -1.814420      | 3.990610  | -1.701429 | H | 4.903987  | -2.937446 | 0.082110  |
| H                                                     | -0.250339      | 5.299401  | -0.155798 | H | 3.927769  | -3.107429 | -1.388072 |
| H                                                     | 0.160287       | 4.680204  | 1.461589  | H | 2.328081  | -0.882271 | 1.933974  |
| H                                                     | -1.472682      | 5.295531  | 1.127541  | H | 3.811118  | -1.823248 | 2.143475  |
| H                                                     | -1.408786      | -2.446509 | 3.650569  | H | 2.268090  | -2.642886 | 1.866172  |
| C                                                     | -0.206533      | -0.696928 | 4.078808  | H | 4.857980  | 1.290331  | 0.111155  |
| H                                                     | 0.949120       | 1.133987  | 4.133068  | H | 5.385303  | -0.220180 | 0.862085  |
| H                                                     | -0.160690      | -0.872016 | 5.154902  | H | 3.938822  | 0.611066  | 1.457470  |
| <b>6</b>                                              |                |           |           | H | 3.831074  | -1.097692 | -2.488611 |
| SCF energy in gas phase:                              | -3277.79858129 |           |           | H | 5.375405  | -1.074572 | -1.616651 |
| Thermal correction to Enthalpy in gas phase:          | 0.749631       |           |           | H | 4.629958  | 0.439431  | -2.152847 |
| Thermal correction to Gibbs Free Energy in gas phase: | 0.643148       |           |           | C | -1.084332 | -2.325152 | 1.103927  |
| SCF energy in solvent:                                | -3278.04225397 |           |           | C | -3.626196 | -1.358068 | 0.116841  |
| Co                                                    | -0.590095      | 0.114962  | -0.656684 | C | -1.974187 | -3.012429 | -1.584012 |
| P                                                     | -1.857415      | -1.587318 | -0.404130 | C | 0.429723  | 3.408169  | -1.514052 |
| B                                                     | 1.417781       | -0.534271 | -0.900440 | C | -1.862775 | 3.158300  | 0.268681  |
| H                                                     | 0.525108       | -0.344460 | -1.786543 | C | 0.699728  | 2.186024  | 1.167918  |
|                                                       |                |           |           | C | -0.513166 | -1.209516 | 1.932364  |
|                                                       |                |           |           | C | 0.335969  | 0.965648  | 1.965127  |

|   |           |           |           |                                         |                |           |           |
|---|-----------|-----------|-----------|-----------------------------------------|----------------|-----------|-----------|
| H | -1.738429 | -2.972002 | 1.706815  | H                                       | 0.281754       | 2.011055  | -3.186049 |
| H | -0.244488 | -2.932948 | 0.728218  | H                                       | 1.870865       | 2.037340  | -2.401835 |
| H | -3.995275 | -2.321193 | 0.508055  | H                                       | 2.355884       | 3.783083  | -0.561170 |
| C | -4.488307 | -0.939903 | -1.076993 | H                                       | 1.073416       | 4.889408  | -0.012456 |
| C | -3.713943 | -0.319693 | 1.238051  | H                                       | 1.801044       | 5.090947  | -1.621693 |
| H | -2.608791 | -2.615358 | -2.394639 | H                                       | -3.919045      | 3.502466  | -0.365220 |
| C | -2.637479 | -4.271341 | -1.019146 | H                                       | -3.156808      | 2.050868  | -1.089673 |
| C | -0.607775 | -3.332375 | -2.194970 | H                                       | -2.727224      | 3.672926  | -1.671943 |
| H | -0.409775 | 4.023538  | -1.882106 | H                                       | -1.335195      | 5.247757  | -0.110637 |
| C | 1.025743  | 2.668073  | -2.715055 | H                                       | -0.843964      | 4.672273  | 1.501158  |
| C | 1.465030  | 4.344895  | -0.883491 | H                                       | -2.550315      | 5.017050  | 1.159070  |
| H | -2.175877 | 2.561273  | 1.144286  | H                                       | -0.624096      | -2.255925 | 3.804139  |
| C | -2.982596 | 3.088486  | -0.772108 | C                                       | 0.186477       | -0.261483 | 4.028571  |
| C | -1.625828 | 4.597790  | 0.730103  | H                                       | 0.939186       | 1.762633  | 3.865558  |
| H | 1.720668  | 2.043613  | 0.780715  | H                                       | 0.324646       | -0.331731 | 5.108484  |
| H | 0.690605  | 3.087564  | 1.795709  | <b>TS<sub>6-7</sub></b>                 |                |           |           |
| C | -0.339199 | -1.327536 | 3.308854  | SCF energy in gas phase:                | -3277.78793547 |           |           |
| C | 0.527225  | 0.899244  | 3.342729  | Thermal correction to Enthalpy in gas   |                |           |           |
| H | -5.504940 | -0.676413 | -0.744348 | phase:                                  | 0.746587       |           |           |
| H | -4.582609 | -1.742242 | -1.823953 | Thermal correction to Gibbs Free Energy |                |           |           |
| H | -4.052524 | -0.061448 | -1.579592 | in gas phase:                           | 0.638931       |           |           |
| H | -3.305624 | 0.643414  | 0.896985  | SCF energy in solvent:                  | -3278.03236867 |           |           |
| H | -3.150840 | -0.622317 | 2.134229  | Co                                      | -0.473188      | 0.340110  | -0.565513 |
| H | -4.763067 | -0.168220 | 1.538169  | P                                       | -2.181661      | -0.948981 | -0.551493 |
| H | -2.703753 | -5.048952 | -1.797032 | B                                       | 1.035745       | -0.884478 | -0.487965 |
| H | -3.658153 | -4.085993 | -0.653661 | H                                       | 0.194229       | -0.214097 | -1.797276 |
| H | -2.050164 | -4.693615 | -0.187339 | P                                       | 0.593697       | 2.186321  | -0.311550 |
| H | 0.105128  | -3.693933 | -1.438077 | H                                       | -1.527521      | 1.311437  | -1.104447 |
| H | -0.162060 | -2.443340 | -2.659939 | N                                       | -0.608269      | 0.302133  | 1.436838  |
| H | -0.713093 | -4.116276 | -2.961894 | O                                       | 0.934786       | -2.221876 | -0.063917 |
| H | 1.388788  | 3.391306  | -3.463632 | O                                       | 2.401466       | -0.566023 | -0.556011 |

|   |           |           |           |   |           |           |           |
|---|-----------|-----------|-----------|---|-----------|-----------|-----------|
| C | 2.200625  | -2.651429 | 0.434641  | H | -3.053545 | -2.007539 | -2.472884 |
| C | 3.182544  | -1.746956 | -0.366914 | C | -3.370987 | -3.503008 | -0.966131 |
| C | 4.462596  | -1.385804 | 0.366223  | C | -1.210290 | -3.048353 | -2.185414 |
| C | 3.510755  | -2.307182 | -1.748633 | H | 1.956125  | 3.834407  | -1.404168 |
| C | 2.359009  | -4.141777 | 0.192433  | C | 2.097113  | 2.091313  | -2.646492 |
| C | 2.215717  | -2.359407 | 1.935356  | C | 3.432095  | 2.546103  | -0.548487 |
| H | 1.632570  | -4.691644 | 0.792939  | H | -1.323970 | 3.399157  | 0.319514  |
| H | 3.358614  | -4.477351 | 0.478363  | C | -0.909761 | 4.103422  | -1.661709 |
| H | 2.192424  | -4.392120 | -0.853851 | C | 0.188498  | 4.929623  | 0.456526  |
| H | 2.112359  | -1.289436 | 2.126318  | H | 2.057326  | 1.377965  | 1.369787  |
| H | 3.130617  | -2.714997 | 2.412271  | H | 1.387364  | 2.902867  | 1.984634  |
| H | 1.366131  | -2.863487 | 2.398284  | C | -1.522633 | -0.643374 | 3.434578  |
| H | 5.087079  | -0.756747 | -0.269945 | C | 0.029142  | 1.172491  | 3.572765  |
| H | 5.031649  | -2.283628 | 0.617989  | H | -5.215678 | 0.918873  | -1.843054 |
| H | 4.253158  | -0.837918 | 1.283956  | H | -4.197732 | -0.246624 | -2.712407 |
| H | 2.599981  | -2.586999 | -2.279832 | H | -3.483822 | 1.269234  | -2.112144 |
| H | 4.165413  | -3.178409 | -1.688152 | H | -3.226489 | 1.644385  | 0.466945  |
| H | 4.016489  | -1.534035 | -2.328240 | H | -3.869283 | 0.416051  | 1.588134  |
| C | -2.051816 | -1.628770 | 1.157725  | H | -4.983368 | 1.338716  | 0.558295  |
| C | -3.869356 | -0.170909 | -0.534833 | H | -3.637857 | -4.278056 | -1.702039 |
| C | -2.492732 | -2.433093 | -1.623950 | H | -4.309846 | -3.097433 | -0.560263 |
| C | 2.093669  | 2.750101  | -1.262370 | H | -2.834929 | -4.005276 | -0.145225 |
| C | -0.440427 | 3.728354  | -0.253237 | H | -0.594244 | -3.486387 | -1.387860 |
| C | 1.138183  | 1.982882  | 1.439877  | H | -0.595107 | -2.290913 | -2.690144 |
| C | -1.386776 | -0.614713 | 2.048217  | H | -1.463580 | -3.839087 | -2.909801 |
| C | 0.132987  | 1.146964  | 2.184251  | H | 2.897513  | 2.524498  | -3.268348 |
| H | -2.994998 | -1.993358 | 1.589325  | H | 1.138639  | 2.232227  | -3.166938 |
| H | -1.356086 | -2.479899 | 1.066439  | H | 2.265232  | 1.009125  | -2.552231 |
| H | -4.587911 | -0.985465 | -0.339367 | H | 3.605867  | 1.479983  | -0.343400 |
| C | -4.208747 | 0.473667  | -1.880782 | H | 3.488556  | 3.105796  | 0.397699  |
| C | -3.991285 | 0.861271  | 0.589385  | H | 4.251003  | 2.905045  | -1.192617 |

|                                                       |                |           |           |   |           |           |           |
|-------------------------------------------------------|----------------|-----------|-----------|---|-----------|-----------|-----------|
| H                                                     | -1.661540      | 4.906775  | -1.613748 | C | 3.300397  | -0.844036 | 1.959507  |
| H                                                     | -1.357187      | 3.236855  | -2.169655 | H | 2.465621  | -3.281202 | 2.592782  |
| H                                                     | -0.073772      | 4.474108  | -2.277806 | H | 3.920581  | -3.551241 | 1.624777  |
| H                                                     | 1.126087       | 5.250281  | -0.026226 | H | 2.331181  | -4.005459 | 0.988914  |
| H                                                     | 0.406320       | 4.728030  | 1.515338  | H | 3.213258  | 0.165552  | 1.555054  |
| H                                                     | -0.500413      | 5.788770  | 0.424815  | H | 4.352288  | -1.039415 | 2.174585  |
| H                                                     | -2.174013      | -1.386896 | 3.894399  | H | 2.739239  | -0.882031 | 2.894100  |
| C                                                     | -0.823611      | 0.276153  | 4.207811  | H | 4.881558  | -0.981796 | -1.642798 |
| H                                                     | 0.626123       | 1.884182  | 4.143445  | H | 5.367851  | -1.669420 | -0.087789 |
| H                                                     | -0.926356      | 0.281218  | 5.294067  | H | 4.622445  | -0.063859 | -0.160972 |
| 7                                                     |                |           |           | H | 2.263935  | -3.511220 | -1.205833 |
| SCF energy in gas phase:                              | -3277.80025365 |           |           | H | 4.003143  | -3.693919 | -0.929998 |
| Thermal correction to Enthalpy in gas phase:          | 0.749186       |           |           | H | 3.409899  | -2.772934 | -2.321488 |
| Thermal correction to Gibbs Free Energy in gas phase: | 0.64272        |           |           | C | -2.018873 | -1.754244 | 1.130988  |
| SCF energy in solvent:                                | -3278.04595371 |           |           | C | -3.736837 | -0.807517 | -1.020452 |
| Co                                                    | -0.536453      | 0.317845  | -0.549934 | C | -1.813327 | -2.855739 | -1.555925 |
| P                                                     | -1.975339      | -1.250894 | -0.641719 | C | 2.249494  | 2.394617  | -0.845338 |
| B                                                     | 1.105390       | -0.782496 | -0.283180 | C | -0.364608 | 3.747359  | -0.732465 |
| H                                                     | -0.248375      | 0.252379  | -1.989563 | C | 0.646733  | 2.246829  | 1.528602  |
| P                                                     | 0.493603       | 2.157653  | -0.311918 | C | -1.648915 | -0.584047 | 2.000657  |
| H                                                     | -1.729386      | 1.216996  | -0.847469 | C | -0.369720 | 1.351066  | 2.187327  |
| N                                                     | -0.873626      | 0.357727  | 1.434728  | H | -2.956091 | -2.227263 | 1.456028  |
| O                                                     | 1.321350       | -1.569058 | 0.863767  | H | -1.205139 | -2.491660 | 1.239503  |
| O                                                     | 2.270220       | -0.826944 | -1.050418 | H | -4.319265 | -1.743419 | -0.990950 |
| C                                                     | 2.709937       | -1.870710 | 0.993070  | C | -3.836521 | -0.206880 | -2.425381 |
| C                                                     | 3.234653       | -1.707639 | -0.473495 | C | -4.318354 | 0.152245  | 0.019956  |
| C                                                     | 4.609144       | -1.064663 | -0.589931 | H | -2.189961 | -2.613128 | -2.564122 |
| C                                                     | 3.226170       | -3.007974 | -1.272552 | C | -2.663214 | -3.996523 | -0.985370 |
| C                                                     | 2.867646       | -3.263976 | 1.578625  | C | -0.353969 | -3.283391 | -1.691993 |
|                                                       |                |           |           | H | 2.744224  | 1.569927  | -0.305954 |
|                                                       |                |           |           | C | 2.894404  | 3.715690  | -0.422479 |

C 2.452157 2.113044 -2.336443  
 H 0.340059 4.563054 -0.499599  
 C -1.625315 3.946635 0.113628  
 C -0.716805 3.789100 -2.221773  
 H 1.639987 1.834105 1.772780  
 H 0.614023 3.266285 1.938077  
 C -2.036010 -0.497128 3.336299  
 C -0.722043 1.495138 3.527585  
 H -4.885048 0.031368 -2.664545  
 H -3.465168 -0.892108 -3.202714  
 H -3.242198 0.717834 -2.481201  
 H -3.705946 1.065066 0.082547  
 H -4.370701 -0.296280 1.023655  
 H -5.341483 0.443277 -0.265760  
 H -2.621902 -4.869840 -1.655305  
 H -3.722298 -3.726429 -0.863279  
 H -2.281468 -4.322115 -0.004465  
 H 0.086161 -3.488990 -0.702895  
 H 0.249836 -2.498647 -2.166751  
 H -0.279194 -4.203188 -2.293951  
 H 3.977561 3.687195 -0.622273  
 H 2.761320 3.929027 0.649827  
 H 2.484214 4.565958 -0.989800  
 H 2.091639 2.946210 -2.959233  
 H 1.933967 1.192391 -2.635105  
 H 3.526003 1.986134 -2.547234  
 H -2.122645 4.886284 -0.174129  
 H -1.411581 4.003781 1.191672  
 H -2.330840 3.118324 -0.052023  
 H -1.346370 2.923441 -2.480879  
 H 0.173825 3.762823 -2.864440

H -1.272793 4.710830 -2.455882  
 H -2.682774 -1.264650 3.761636  
 C -1.582874 0.568599 4.104856  
 H -0.314985 2.324420 4.106478  
 H -1.882169 0.665636 5.149748

**TS<sub>7-8</sub>**

SCF energy in gas phase: -3277.79804763

Thermal correction to Enthalpy in gas phase: 0.748583

Thermal correction to Gibbs Free Energy in gas phase: 0.645262

SCF energy in solvent: -3278.04405933

Co 0.551080 0.236261 -0.472093  
 P 1.892818 -1.406372 -0.465112  
 B -1.180389 -0.691769 -0.127260  
 H 0.218481 0.008136 -1.881401  
 P -0.407400 2.128865 -0.401875  
 H 1.782250 0.997405 -0.939053  
 N 1.033902 0.533510 1.459636  
 O -1.995525 -0.440206 0.993187  
 O -1.835031 -1.631961 -0.922230  
 C -3.111535 -1.329637 1.026357  
 C -3.157968 -1.877157 -0.444096  
 C -4.117151 -1.105119 -1.346932  
 C -3.453108 -3.364834 -0.557230  
 C -2.818432 -2.399587 2.076211  
 C -4.345991 -0.548618 1.453966  
 H -2.637196 -1.908364 3.033045  
 H -3.655930 -3.089366 2.194394  
 H -1.929961 -2.975806 1.823038  
 H -4.517001 0.314931 0.813163

|   |           |           |           |   |           |           |           |
|---|-----------|-----------|-----------|---|-----------|-----------|-----------|
| H | -5.236940 | -1.179961 | 1.429566  | H | -0.632144 | 3.385659  | 1.761768  |
| H | -4.212310 | -0.190677 | 2.475982  | C | 2.440538  | 0.056219  | 3.328366  |
| H | -3.954310 | -1.419375 | -2.378246 | C | 0.945048  | 1.923042  | 3.401217  |
| H | -5.160277 | -1.292188 | -1.085718 | H | 4.099852  | -1.070382 | -3.484198 |
| H | -3.931247 | -0.033441 | -1.294778 | H | 2.588259  | -1.986737 | -3.275901 |
| H | -2.704991 | -3.960032 | -0.036811 | H | 2.576100  | -0.221460 | -3.081389 |
| H | -4.436911 | -3.600871 | -0.145158 | H | 3.825460  | 0.877169  | -1.110625 |
| H | -3.445117 | -3.656080 | -1.608325 | H | 4.603192  | -0.134409 | 0.128021  |
| C | 2.431929  | -1.463669 | 1.305856  | H | 5.290194  | -0.065515 | -1.507968 |
| C | 3.482705  | -1.250995 | -1.404137 | H | 2.005337  | -5.159656 | -1.317052 |
| C | 1.352294  | -3.147546 | -0.850711 | H | 3.032347  | -3.919058 | -2.055587 |
| C | -2.135470 | 2.385717  | -1.010581 | H | 3.159298  | -4.262214 | -0.311787 |
| C | 0.524526  | 3.651525  | -0.902553 | H | 1.010730  | -4.109350 | 1.083843  |
| C | -0.586520 | 2.341111  | 1.422521  | H | -0.244276 | -2.922483 | 0.628286  |
| C | 1.961386  | -0.238543 | 2.052926  | H | -0.190658 | -4.511212 | -0.158342 |
| C | 0.508445  | 1.581493  | 2.123149  | H | -3.775041 | 3.807884  | -1.040524 |
| H | 3.517179  | -1.597237 | 1.420236  | H | -2.557571 | 4.171420  | 0.201409  |
| H | 1.960044  | -2.336792 | 1.780763  | H | -2.219694 | 4.513613  | -1.514097 |
| H | 4.051069  | -2.177349 | -1.222217 | H | -1.813278 | 2.532457  | -3.174870 |
| C | 3.169023  | -1.130890 | -2.898409 | H | -1.921068 | 0.864724  | -2.562402 |
| C | 4.345705  | -0.076329 | -0.940834 | H | -3.390549 | 1.872555  | -2.706257 |
| H | 0.736273  | -2.997312 | -1.752333 | H | 2.368527  | 4.688870  | -0.426629 |
| C | 2.454156  | -4.166472 | -1.154725 | H | 1.602919  | 3.950761  | 0.994359  |
| C | 0.430648  | -3.695922 | 0.242352  | H | 2.446251  | 2.920484  | -0.190533 |
| H | -2.694504 | 1.701393  | -0.349528 | H | 1.401630  | 2.697385  | -2.643368 |
| C | -2.694651 | 3.797300  | -0.825181 | H | -0.054165 | 3.651821  | -3.021657 |
| C | -2.319637 | 1.882537  | -2.445873 | H | 1.474979  | 4.483703  | -2.671486 |
| H | -0.129239 | 4.513870  | -0.690359 | H | 3.204080  | -0.580036 | 3.776748  |
| C | 1.805611  | 3.808746  | -0.077928 | C | 1.932881  | 1.156652  | 4.008249  |
| C | 0.850193  | 3.618786  | -2.397661 | H | 0.509478  | 2.784962  | 3.906938  |
| H | -1.536849 | 1.846306  | 1.678806  | H | 2.298191  | 1.410162  | 5.004806  |

**8**

SCF energy in gas phase: -3277.80317592

Thermal correction to Enthalpy in gas phase: 0.749376

Thermal correction to Gibbs Free Energy in gas phase: 0.64386

SCF energy in solvent: -3278.04855767

Co -0.000476 -0.629442 -0.567565

P -2.114579 -0.844693 -0.614656

B 0.006615 1.297302 -0.044450

H 0.060568 -0.031248 -1.903117

P 2.113722 -0.746898 -0.329038

H -0.045626 -1.996722 -1.267741

N -0.083614 -1.512375 1.234488

O 0.773123 1.907388 0.967043

O -0.738149 2.305217 -0.663740

C 0.443404 3.292314 1.099094

C -0.285329 3.594374 -0.253548

C 0.655932 4.109183 -1.340535

C -1.483138 4.523416 -0.137910

C -0.455619 3.440910 2.323039

C 1.725163 4.080407 1.323214

H 0.061474 3.028707 3.190617

H -0.689516 4.487612 2.525171

H -1.388181 2.894896 2.196145

H 2.456681 3.888036 0.539974

H 1.522908 5.153369 1.352912

H 2.167127 3.792776 2.278532

H 0.120882 4.115494 -2.290516

H 1.005621 5.121630 -1.130638

H 1.520665 3.455146 -1.450596

H -2.244697 4.110494 0.521976

H -1.183789 5.502495 0.243099

H -1.929204 4.663938 -1.123339

C -2.302032 -2.243175 0.576773

C -2.976351 -1.364948 -2.159718

C -3.259168 0.432469 0.101121

C 3.250251 0.646332 -0.760619

C 3.002314 -2.291529 -0.837819

C 2.216352 -0.801724 1.516005

C -1.203061 -2.161669 1.605957

C 0.988224 -1.491417 2.048304

H -2.135845 -3.162116 -0.007100

H -3.291326 -2.319350 1.050293

H -4.014085 -1.617642 -1.885960

C -2.984524 -0.173832 -3.127192

C -2.342037 -2.585406 -2.827093

H -2.997262 1.349733 -0.449201

C -4.756184 0.152887 -0.050461

C -2.910609 0.665482 1.575386

H 2.893583 1.429380 -0.072530

C 4.732045 0.389681 -0.481567

C 3.018261 1.159636 -2.185420

H 4.040066 -2.204079 -0.474438

C 2.367784 -3.527303 -0.192829

C 3.008607 -2.427262 -2.362530

H 2.184975 0.251196 1.836358

H 3.131669 -1.265282 1.912216

C -1.304751 -2.767644 2.855981

C 0.948464 -2.087210 3.307454

H -3.489030 -0.451382 -4.065817

H -3.502212 0.704274 -2.713762

H -1.952227 0.129056 -3.361116  
H -1.308081 -2.368175 -3.128564  
H -2.314606 -3.463215 -2.164308  
H -2.926474 -2.859868 -3.720107  
H -5.337541 0.926462 0.476634  
H -5.085499 0.156242 -1.098931  
H -5.037714 -0.818884 0.389398  
H -3.273868 -0.159021 2.210248  
H -1.826114 0.757795 1.732331  
H -3.388983 1.589005 1.938089  
H 5.306482 1.321948 -0.602991  
H 4.907891 0.023784 0.542027  
H 5.155681 -0.346662 -1.182818  
H 3.407992 0.463271 -2.942839  
H 1.946784 1.304291 -2.384055  
H 3.537333 2.121631 -2.327511  
H 2.876871 -4.437159 -0.547935  
H 2.442199 -3.514603 0.905153  
H 1.303091 -3.594441 -0.466002  
H 1.978359 -2.383559 -2.750280  
H 3.592246 -1.632253 -2.848395  
H 3.451192 -3.391655 -2.658245  
H -2.226358 -3.278823 3.134848  
C -0.217373 -2.721060 3.721634  
H 1.828200 -2.048291 3.950026  
H -0.273894 -3.187590 4.706550

**TS<sub>8-9</sub>**

SCF energy in gas phase: -3277.78502379  
Thermal correction to Enthalpy in gas  
phase: 0.747798

Thermal correction to Gibbs Free Energy  
in gas phase: 0.642957

SCF energy in solvent: -3278.03193626

Co -0.495791 -0.155460 0.498854  
P 0.251621 -2.189195 0.397635  
P -1.496518 1.770423 0.333817  
H 0.621506 0.356506 1.340185  
B 1.261373 0.526140 -0.093018  
N -2.120733 -0.892850 -0.487041  
H -1.203579 -0.544178 1.826763  
O 2.439516 -0.250367 -0.214789  
O 1.656401 1.867207 -0.289719  
C 3.586661 0.593218 -0.232369  
C 2.989946 1.920282 -0.783390  
C 4.100077 0.730039 1.199852  
C 4.655781 -0.045313 -1.102725  
C 3.656178 3.187208 -0.274293  
C 2.931420 1.946197 -2.310278  
H 3.335999 1.164011 1.846652  
H 4.350043 -0.259108 1.583725  
H 4.995751 1.351561 1.248842  
H 5.512888 0.621910 -1.219770  
H 5.006429 -0.966924 -0.634926  
H 4.267710 -0.292527 -2.089529  
H 3.576393 3.268699 0.808325  
H 4.712633 3.209880 -0.551944  
H 3.171278 4.058984 -0.716766  
H 2.341665 2.805964 -2.627700  
H 3.926532 2.030574 -2.750302  
H 2.451402 1.045476 -2.696013  
H -3.416933 -3.873134 -1.395616

|   |           |           |           |          |           |           |                                                                |
|---|-----------|-----------|-----------|----------|-----------|-----------|----------------------------------------------------------------|
| C | -4.299556 | -1.956458 | -1.883617 | H        | 2.493715  | -1.487609 | 2.258894                                                       |
| H | -4.933754 | 0.105587  | -2.051510 | H        | 2.914740  | -3.100311 | 2.897160                                                       |
| C | -1.328025 | -3.088639 | 0.165436  | H        | 3.076913  | -2.746775 | 1.157305                                                       |
| C | 1.007692  | -3.019630 | 1.865274  | H        | -0.335065 | -2.919105 | -2.551741                                                      |
| C | 1.250188  | -2.823849 | -1.035736 | H        | 0.363070  | -1.294525 | -2.310646                                                      |
| C | -3.011224 | 1.373354  | -0.640629 | H        | 1.279213  | -2.550548 | -3.192503                                                      |
| C | -2.153145 | 2.525137  | 1.893026  | H        | 0.603595  | -4.929118 | -1.059672                                                      |
| C | -0.868498 | 3.253941  | -0.596660 | H        | 2.102714  | -4.597099 | -1.939921                                                      |
| C | -2.287482 | -2.230187 | -0.600691 | H        | 2.119317  | -4.648840 | -0.169292                                                      |
| C | -3.097086 | -0.091475 | -0.956264 | H        | -0.348551 | 3.741034  | 2.217246                                                       |
| H | -1.222280 | -4.082846 | -0.288630 | H        | -1.322313 | 3.452902  | 3.678800                                                       |
| H | -1.756906 | -3.219734 | 1.171586  | H        | -0.323057 | 2.140569  | 2.995814                                                       |
| H | 0.995577  | -4.101368 | 1.647708  | H        | -3.428050 | 2.080223  | 3.584561                                                       |
| C | 0.216574  | -2.776617 | 3.152210  | H        | -3.914448 | 1.226788  | 2.104095                                                       |
| C | 2.459156  | -2.566369 | 2.048655  | H        | -2.478918 | 0.677837  | 2.990876                                                       |
| H | 2.201759  | -2.285650 | -0.942250 | H        | -0.124899 | 1.894894  | -2.145606                                                      |
| C | 0.598835  | -2.369152 | -2.345759 | H        | -1.519371 | 2.888160  | -2.658976                                                      |
| C | 1.527775  | -4.328224 | -1.039193 | H        | 0.081757  | 3.625775  | -2.512706                                                      |
| H | -3.915960 | 1.670108  | -0.088721 | H        | -1.795849 | 4.928553  | 0.493695                                                       |
| H | -3.019427 | 1.953157  | -1.573555 | H        | -1.353593 | 5.280801  | -1.184503                                                      |
| H | -2.760242 | 3.396886  | 1.600095  | H        | -2.788824 | 4.297593  | -0.843392                                                      |
| C | -0.967765 | 2.996736  | 2.741210  | H        | -5.132404 | -2.367986 | -2.455637                                                      |
| C | -3.044652 | 1.569784  | 2.686459  | <b>9</b> |           |           |                                                                |
| H | 0.101560  | 3.465117  | -0.129023 |          |           |           | SCF energy in gas phase: -3277.78906062                        |
| C | -0.594048 | 2.884494  | -2.059044 |          |           |           | Thermal correction to Enthalpy in gas phase: 0.7486            |
| C | -1.754318 | 4.500415  | -0.517667 |          |           |           | Thermal correction to Gibbs Free Energy in gas phase: 0.641279 |
| C | -3.345128 | -2.788596 | -1.311950 |          |           |           | SCF energy in solvent: -3278.03518792                          |
| C | -4.184883 | -0.590215 | -1.671862 |          |           |           | Co 0.543841 0.032729 0.698179                                  |
| H | 0.188942  | -1.704880 | 3.393305  |          |           |           | P 0.537444 2.182218 0.350363                                   |
| H | -0.826461 | -3.117888 | 3.081529  |          |           |           |                                                                |
| H | 0.691706  | -3.322351 | 3.983323  |          |           |           |                                                                |

|   |           |           |           |   |           |           |           |
|---|-----------|-----------|-----------|---|-----------|-----------|-----------|
| P | 0.678286  | -2.125275 | 0.424183  | C | 2.499663  | -2.308565 | 0.287547  |
| H | -0.756785 | -0.000912 | 1.456154  | C | 0.232995  | -3.295487 | 1.786616  |
| B | -1.299058 | -0.034424 | 0.039911  | C | 0.106473  | -3.005763 | -1.110792 |
| N | 2.400113  | 0.078354  | -0.078132 | C | 3.006789  | 1.251180  | -0.358785 |
| H | 1.190876  | 0.072182  | 2.118430  | C | 3.084936  | -1.063298 | -0.303952 |
| O | -2.152409 | 1.059911  | -0.233020 | H | 2.596397  | 3.371866  | -0.412498 |
| O | -2.071847 | -1.200785 | -0.173921 | H | 2.731958  | 2.632444  | 1.195600  |
| C | -3.494625 | 0.607293  | -0.379359 | H | 0.436492  | 4.354835  | 1.387876  |
| C | -3.279582 | -0.862471 | -0.843377 | C | 0.622637  | 2.986029  | 3.039101  |
| C | -4.174431 | 0.699968  | 0.985177  | C | -1.490705 | 3.462422  | 1.771832  |
| C | -4.211183 | 1.499566  | -1.378035 | H | -1.188668 | 2.784878  | -1.158023 |
| C | -4.367979 | -1.836199 | -0.426911 | C | 0.428460  | 2.193452  | -2.417274 |
| C | -3.026806 | -0.973057 | -2.347268 | C | 0.137640  | 4.469086  | -1.349363 |
| H | -3.667757 | 0.066667  | 1.715095  | H | 2.881820  | -2.378143 | 1.318653  |
| H | -4.121703 | 1.731178  | 1.335721  | H | 2.826582  | -3.207997 | -0.250546 |
| H | -5.224569 | 0.407292  | 0.935308  | H | 0.731503  | -4.252329 | 1.553223  |
| H | -5.212773 | 1.119007  | -1.590961 | C | -1.281061 | -3.528620 | 1.837045  |
| H | -4.311761 | 2.504907  | -0.965605 | C | 0.737223  | -2.803961 | 3.145448  |
| H | -3.658122 | 1.570496  | -2.313370 | H | -0.986508 | -2.926894 | -1.053994 |
| H | -4.455175 | -1.891369 | 0.656782  | C | 0.560329  | -2.220464 | -2.343773 |
| H | -5.333806 | -1.541007 | -0.843443 | C | 0.489303  | -4.483363 | -1.212674 |
| H | -4.129788 | -2.834374 | -0.798206 | C | 4.224819  | 1.310243  | -1.031071 |
| H | -2.675021 | -1.980833 | -2.572885 | C | 4.305354  | -1.071978 | -0.974093 |
| H | -3.932977 | -0.787728 | -2.926426 | H | 0.276475  | 1.988363  | 3.343671  |
| H | -2.256041 | -0.268715 | -2.663891 | H | 1.722146  | 2.956168  | 3.034864  |
| H | 4.656951  | 2.282994  | -1.266318 | H | 0.312236  | 3.724979  | 3.795284  |
| C | 4.871486  | 0.130760  | -1.377974 | H | -1.916518 | 2.487750  | 2.051951  |
| H | 4.802693  | -2.023374 | -1.163335 | H | -1.773375 | 4.198609  | 2.540555  |
| C | 2.340893  | 2.481261  | 0.176774  | H | -1.956579 | 3.761830  | 0.822123  |
| C | 0.035772  | 3.368511  | 1.678414  | H | 1.505061  | 2.374040  | -2.576526 |
| C | -0.107538 | 2.965673  | -1.208400 | H | 0.282171  | 1.111471  | -2.281011 |

|                                                                |           |           |           |   |           |           |           |
|----------------------------------------------------------------|-----------|-----------|-----------|---|-----------|-----------|-----------|
| H                                                              | -0.095277 | 2.504484  | -3.334716 | O | -2.365166 | 0.632742  | 0.062196  |
| H                                                              | 1.209654  | 4.726259  | -1.333040 | O | -1.780036 | -1.496786 | -0.395888 |
| H                                                              | -0.259900 | 4.821525  | -2.314776 | C | -3.585471 | -0.071118 | -0.148431 |
| H                                                              | -0.360506 | 5.051707  | -0.560989 | C | -3.093314 | -1.327607 | -0.923192 |
| H                                                              | -1.677796 | -3.940597 | 0.898262  | C | -4.165685 | -0.410955 | 1.223014  |
| H                                                              | -1.521604 | -4.234204 | 2.647659  | C | -4.548246 | 0.821162  | -0.912521 |
| H                                                              | -1.812792 | -2.584742 | 2.027197  | C | -3.896917 | -2.592552 | -0.677980 |
| H                                                              | 0.488306  | -3.545566 | 3.921525  | C | -2.952634 | -1.079927 | -2.424455 |
| H                                                              | 1.826194  | -2.651101 | 3.164881  | H | -3.485419 | -1.053954 | 1.783475  |
| H                                                              | 0.276608  | -1.840336 | 3.404166  | H | -4.297914 | 0.513110  | 1.787021  |
| H                                                              | 0.302252  | -1.156232 | -2.240422 | H | -5.134128 | -0.907734 | 1.142828  |
| H                                                              | 1.650189  | -2.293600 | -2.498064 | H | -5.461572 | 0.279141  | -1.168292 |
| H                                                              | 0.072847  | -2.611509 | -3.250645 | H | -4.822889 | 1.676913  | -0.293831 |
| H                                                              | 0.071243  | -5.083881 | -0.391797 | H | -4.098009 | 1.196905  | -1.830157 |
| H                                                              | 0.101443  | -4.903804 | -2.154547 | H | -3.878452 | -2.877187 | 0.372532  |
| H                                                              | 1.580847  | -4.636840 | -1.221527 | H | -4.936041 | -2.457989 | -0.987119 |
| H                                                              | 5.816537  | 0.149660  | -1.922675 | H | -3.474493 | -3.414497 | -1.258286 |
| <b>TS<sub>9-10</sub></b>                                       |           |           |           | H | -2.406046 | -1.913589 | -2.867631 |
| SCF energy in gas phase: -3277.78184317                        |           |           |           | H | -3.923272 | -1.002312 | -2.917364 |
| Thermal correction to Enthalpy in gas phase: 0.746252          |           |           |           | H | -2.386468 | -0.166861 | -2.615431 |
| Thermal correction to Gibbs Free Energy in gas phase: 0.638159 |           |           |           | H | 4.275190  | 3.052467  | -1.101328 |
| SCF energy in solvent: -3278.02569421                          |           |           |           | C | 4.925247  | 0.988801  | -1.022887 |
| Co                                                             | 0.520555  | 0.120501  | 0.709803  | H | 5.245121  | -1.129997 | -0.709905 |
| P                                                              | 0.111174  | 2.196054  | 0.263294  | C | 1.825489  | 2.861602  | 0.092714  |
| P                                                              | 1.048123  | -1.953773 | 0.377278  | C | -0.593238 | 3.359832  | 1.530410  |
| H                                                              | -0.397302 | -0.072626 | 1.849396  | C | -0.677291 | 2.776554  | -1.319988 |
| B                                                              | -1.277171 | -0.263531 | 0.060531  | C | 2.882973  | -1.824949 | 0.492554  |
| N                                                              | 2.411831  | 0.512280  | 0.100108  | C | 0.670734  | -3.278914 | 1.618232  |
| H                                                              | 0.778556  | 0.178894  | 2.224977  | C | 0.828028  | -2.818295 | -1.253313 |
|                                                                |           |           |           | C | 2.788942  | 1.762630  | -0.239428 |
|                                                                |           |           |           | C | 3.309243  | -0.488833 | -0.035004 |

|   |           |           |           |                                         |                |           |           |
|---|-----------|-----------|-----------|-----------------------------------------|----------------|-----------|-----------|
| H | 1.908277  | 3.693462  | -0.620125 | H                                       | -0.935366      | -4.618564 | 2.191137  |
| H | 2.111321  | 3.258855  | 1.079684  | H                                       | -1.486692      | -2.995392 | 1.690975  |
| H | -0.288411 | 4.372360  | 1.211962  | H                                       | 0.739706       | -3.639751 | 3.752876  |
| C | -0.004889 | 3.094471  | 2.918501  | H                                       | 1.939557       | -2.443833 | 3.217763  |
| C | -2.122567 | 3.309925  | 1.597568  | H                                       | 0.234696       | -1.981995 | 3.312983  |
| H | -1.713950 | 2.421844  | -1.229666 | H                                       | 0.952003       | -0.891813 | -2.263086 |
| C | -0.037293 | 2.042758  | -2.500548 | H                                       | 2.442617       | -1.857951 | -2.385178 |
| C | -0.691530 | 4.289476  | -1.548805 | H                                       | 1.024800       | -2.300911 | -3.358480 |
| H | 3.124268  | -1.846874 | 1.567102  | H                                       | 0.976290       | -4.927510 | -0.642454 |
| H | 3.432579  | -2.645355 | 0.010909  | H                                       | 1.255366       | -4.628324 | -2.366760 |
| H | 1.367116  | -4.108245 | 1.403905  | H                                       | 2.516115       | -4.224718 | -1.191588 |
| C | -0.764648 | -3.796885 | 1.477760  | H                                       | 5.895794       | 1.170585  | -1.486869 |
| C | 0.914226  | -2.806095 | 3.053818  | <b>10</b>                               |                |           |           |
| H | -0.264186 | -2.883673 | -1.353027 | SCF energy in gas phase:                | -3277.79713991 |           |           |
| C | 1.341069  | -1.913727 | -2.377171 | Thermal correction to Enthalpy in gas   |                |           |           |
| C | 1.425967  | -4.222618 | -1.356438 | phase:                                  | 0.749483       |           |           |
| C | 4.026972  | 2.028936  | -0.819510 | Thermal correction to Gibbs Free Energy |                |           |           |
| C | 4.564368  | -0.285359 | -0.602026 | in gas phase:                           | 0.644255       |           |           |
| H | -0.303463 | 2.100655  | 3.280884  | SCF energy in solvent:                  | -3278.03956448 |           |           |
| H | 1.094773  | 3.122891  | 2.932009  | Co                                      | -0.438892      | 0.051151  | -0.641984 |
| H | -0.368391 | 3.854546  | 3.628608  | P                                       | -0.386555      | 2.046953  | 0.076716  |
| H | -2.461186 | 2.315591  | 1.919947  | P                                       | -0.850917      | -1.954790 | -0.017327 |
| H | -2.486069 | 4.057611  | 2.320438  | N                                       | -2.450633      | 0.249548  | -0.695013 |
| H | -2.597836 | 3.514645  | 0.627787  | B                                       | 1.472580       | -0.133706 | -0.328012 |
| H | 1.014910  | 2.341039  | -2.647380 | H                                       | -0.247800      | -0.383757 | -2.163218 |
| H | -0.057215 | 0.955947  | -2.336510 | H                                       | -0.190532      | 0.496231  | -2.148387 |
| H | -0.576681 | 2.267517  | -3.434278 | O                                       | 2.107045       | -0.576959 | 0.842259  |
| H | 0.324595  | 4.712905  | -1.607448 | O                                       | 2.471619       | 0.147773  | -1.272422 |
| H | -1.186727 | 4.517828  | -2.506346 | C                                       | 3.495904       | -0.793883 | 0.593805  |
| H | -1.236307 | 4.831500  | -0.762775 | C                                       | 3.754485       | 0.118055  | -0.646216 |
| H | -0.986138 | -4.169156 | 0.467735  | C                                       | 3.684684       | -2.278897 | 0.289941  |

|   |           |           |           |   |           |           |           |
|---|-----------|-----------|-----------|---|-----------|-----------|-----------|
| C | 4.286536  | -0.425889 | 1.838423  | C | 0.919360  | 3.101102  | -2.182037 |
| C | 4.779421  | -0.415533 | -1.632352 | H | -1.389176 | -3.585424 | 1.718680  |
| C | 4.111340  | 1.551758  | -0.258915 | C | -0.012219 | -2.203672 | 2.624768  |
| H | 4.737268  | -2.535256 | 0.158149  | C | -2.487197 | -1.827586 | 2.259800  |
| H | 3.291546  | -2.859383 | 1.126067  | H | 0.956735  | -3.477742 | 0.070190  |
| H | 3.141687  | -2.566889 | -0.610340 | C | 0.717900  | -3.132074 | -2.030686 |
| H | 4.037082  | -1.115550 | 2.646195  | C | -0.628137 | -4.744744 | -0.653706 |
| H | 5.360753  | -0.494511 | 1.651417  | H | -2.262434 | -2.364321 | -1.912463 |
| H | 4.054277  | 0.583248  | 2.174342  | H | -3.119426 | -2.990316 | -0.484735 |
| H | 4.896049  | 0.289877  | -2.456242 | C | -4.617576 | -0.760160 | -0.702545 |
| H | 5.752308  | -0.541863 | -1.151396 | C | -4.398257 | 1.614314  | -0.468023 |
| H | 4.468007  | -1.371760 | -2.049301 | H | -1.403190 | 2.088510  | 3.707871  |
| H | 5.124570  | 1.624734  | 0.140050  | H | -2.376675 | 1.791789  | 2.248532  |
| H | 4.039969  | 2.182168  | -1.146268 | H | -1.059766 | 0.676926  | 2.674778  |
| H | 3.417020  | 1.935573  | 0.489371  | H | 1.431058  | 1.371903  | 2.288947  |
| H | -6.295776 | 0.583038  | -0.490667 | H | 1.775248  | 3.099458  | 2.007046  |
| C | -0.349838 | 2.555485  | 1.864847  | H | 1.040440  | 2.586932  | 3.537478  |
| C | -2.070712 | 2.632217  | -0.458796 | H | 1.089391  | 5.465489  | -0.832600 |
| C | 0.733282  | 3.327761  | -0.680195 | H | -0.630465 | 5.037570  | -0.815418 |
| C | -1.216490 | -2.496950 | 1.726252  | H | 0.314755  | 5.001928  | 0.691983  |
| C | 0.121607  | -3.408307 | -0.648134 | H | -0.034633 | 3.177367  | -2.730601 |
| C | -2.498358 | -2.161272 | -0.854933 | H | 1.595394  | 3.867627  | -2.594390 |
| C | -3.228854 | -0.849534 | -0.763299 | H | 1.352071  | 2.112516  | -2.381934 |
| C | -3.014655 | 1.463827  | -0.546764 | H | 0.894549  | -2.723878 | 2.282723  |
| H | -0.647865 | 3.615798  | 1.920032  | H | 0.228834  | -1.130773 | 2.623199  |
| C | -1.358405 | 1.734132  | 2.665741  | H | -0.220377 | -2.523454 | 3.658503  |
| C | 1.055713  | 2.395407  | 2.452622  | H | -3.395298 | -2.215981 | 1.775080  |
| H | -2.494704 | 3.435182  | 0.162877  | H | -2.588232 | -2.008751 | 3.341772  |
| H | -1.937861 | 3.043175  | -1.473385 | H | -2.464828 | -0.739376 | 2.102527  |
| H | 1.707208  | 3.125331  | -0.206420 | H | -0.072585 | -3.010695 | -2.789831 |
| C | 0.351244  | 4.781434  | -0.384365 | H | 1.323937  | -2.216360 | -2.044048 |

H 1.349817 -3.978186 -2.345842  
H 0.055095 -5.562135 -0.934344  
H -1.060818 -5.002391 0.323237  
H -1.445129 -4.737734 -1.393347  
C -5.210337 0.488797 -0.552810  
H -5.219798 -1.667385 -0.754926  
H -4.825967 2.608448 -0.336301

**11**

SCF energy in gas phase: -3276.60284223

Thermal correction to Enthalpy in gas phase: 0.731735

Thermal correction to Gibbs Free Energy in gas phase: 0.624484

SCF energy in solvent: -3276.84634414

Co 0.539781 0.027189 -0.171158  
P 0.777398 -2.069946 -0.086655  
P 0.513925 2.129909 0.012756  
B -1.406324 -0.085461 -0.029980  
N 2.506238 0.145616 -0.361713  
O -2.255537 -0.064082 -1.152307  
O -2.222334 -0.188151 1.112559  
C -3.611374 0.092721 -0.734594  
C -3.572365 -0.452995 0.726575  
C -3.946076 1.582065 -0.799110  
C -4.516716 -0.674734 -1.683259  
C -4.513832 0.242848 1.695937  
C -3.791770 -1.962859 0.800170  
H -3.345235 2.146245 -0.084808  
H -3.718339 1.948023 -1.801247  
H -5.000377 1.772035 -0.589848  
H -5.552097 -0.657292 -1.334494

H -4.482970 -0.215113 -2.672115  
H -4.198084 -1.711020 -1.782841  
H -4.284644 1.303570 1.782989  
H -5.552443 0.134619 1.374321  
H -4.415938 -0.205363 2.685735  
H -3.559107 -2.305708 1.808635  
H -4.824248 -2.233070 0.571933  
H -3.133404 -2.485834 0.105509  
H 5.211844 -1.877578 -0.362190  
C 5.289683 0.275013 -0.150192  
H 4.986184 2.414540 -0.036302  
C 2.523800 -2.273184 -0.670489  
C -0.181012 -3.246470 -1.141104  
C 0.838196 -2.890299 1.572444  
C 2.279745 2.578663 -0.334942  
C -0.441600 3.206211 -1.146036  
C 0.242711 2.902107 1.674179  
C 3.259626 -0.980902 -0.434540  
C 3.137106 1.341731 -0.262145  
H 3.061724 -3.125454 -0.229186  
H 2.479082 -2.444320 -1.758712  
H -1.181618 -3.239809 -0.676097  
C 0.339235 -4.684359 -1.163783  
C -0.335189 -2.666282 -2.550521  
H 1.286917 -3.889353 1.435001  
C -0.563582 -3.046429 2.165980  
C 1.740170 -2.079308 2.507925  
H 2.332381 2.960813 -1.367971  
H 2.674607 3.372981 0.315930  
H -1.483638 3.067902 -0.815831  
C -0.346577 2.638320 -2.565055

C -0.104414 4.696711 -1.091034  
 H 0.666754 3.920796 1.639548  
 C -1.243815 2.993240 2.029655  
 C 1.003136 2.088643 2.725606  
 C 4.647013 -0.946010 -0.318596  
 C 4.521808 1.433183 -0.137591  
 H 1.355877 -4.737067 -1.586874  
 H 0.367469 -5.135555 -0.160962  
 H -0.307976 -5.316708 -1.792463  
 H 0.632856 -2.618285 -3.076691  
 H -1.002054 -3.303032 -3.153669  
 H -0.759393 -1.652552 -2.513013  
 H -1.068072 -2.070397 2.234230  
 H -1.198528 -3.710463 1.559674  
 H -0.500770 -3.481869 3.176119  
 H 1.339350 -1.062738 2.639917  
 H 1.799555 -2.563204 3.495832  
 H 2.766419 -1.982203 2.120959  
 H -0.664429 1.585559 -2.582254  
 H -0.990569 3.212407 -3.250629  
 H 0.682336 2.693869 -2.958577  
 H -0.749778 5.262060 -1.782394  
 H -0.246683 5.120360 -0.085637  
 H 0.938913 4.887352 -1.391616  
 H -1.791752 3.665313 1.351199  
 H -1.715232 1.998789 1.990466  
 H -1.362700 3.390659 3.050332  
 H 2.072527 1.985309 2.482321  
 H 0.926209 2.567805 3.714681  
 H 0.577910 1.075350 2.793486  
 H 6.374701 0.324192 -0.045661

**2** (at ωB97XD/BS4)

SCF energy in gas phase: -2039.75589001

Thermal correction to Enthalpy in gas phase: 0.756123

Thermal correction to Gibbs Free Energy in gas phase: 0.650965

SCF energy in solvent: -3278.059742

Co 0.000000 0.000000 0.428515

P 0.511093 2.082707 0.612209

B 0.000000 0.000000 -1.478097

H -1.475326 0.434384 0.282254

P -0.511093 -2.082707 0.612209

H 1.475326 -0.434384 0.282254

N 0.000000 0.000000 2.486905

O -0.318213 -1.091124 -2.301003

O 0.318213 1.091124 -2.301003

C 0.031555 -0.780298 -3.652793

C -0.031555 0.780298 -3.652793

C 0.955942 1.465462 -4.589183

C -1.444650 1.318210 -3.896873

C -0.955942 -1.465462 -4.589183

C 1.444650 -1.318210 -3.896873

H -0.837956 -2.551843 -4.518299

H -0.777287 -1.171346 -5.630025

H -1.987713 -1.220724 -4.326347

H 2.166183 -0.829356 -3.234246

H 1.763818 -1.173193 -4.934606

H 1.457627 -2.390339 -3.676483

H 0.837956 2.551843 -4.518299

H 0.777287 1.171346 -5.630025

H 1.987713 1.220724 -4.326347

|   |           |           |           |                                        |                                          |           |           |
|---|-----------|-----------|-----------|----------------------------------------|------------------------------------------|-----------|-----------|
| H | -2.166183 | 0.829356  | -3.234246 | H                                      | 2.880004                                 | 1.191937  | -0.901762 |
| H | -1.763818 | 1.173193  | -4.934606 | H                                      | 2.843950                                 | 0.663095  | 1.670273  |
| H | -1.457627 | 2.390339  | -3.676483 | H                                      | 2.629703                                 | 2.008148  | 2.811863  |
| C | -0.108797 | 2.420176  | 2.333785  | H                                      | 4.082910                                 | 1.934536  | 1.805698  |
| C | 2.315164  | 2.528872  | 0.702538  | H                                      | -0.442303                                | 5.609713  | -0.485347 |
| C | -0.242723 | 3.456551  | -0.392087 | H                                      | 1.062971                                 | 5.096883  | 0.279329  |
| C | -2.315164 | -2.528872 | 0.702538  | H                                      | -0.470610                                | 4.977582  | 1.162467  |
| C | 0.242723  | -3.456551 | -0.392087 | H                                      | -2.309966                                | 3.263487  | 0.301028  |
| C | 0.108797  | -2.420176 | 2.333785  | H                                      | -1.904544                                | 2.233421  | -1.075336 |
| C | -0.035149 | 1.163903  | 3.161279  | H                                      | -2.130067                                | 3.986792  | -1.304267 |
| C | 0.035149  | -1.163903 | 3.161279  | H                                      | -4.048435                                | -2.502854 | -0.598771 |
| H | 0.399854  | 3.252400  | 2.833319  | H                                      | -2.532901                                | -2.832033 | -1.461432 |
| H | -1.165816 | 2.696539  | 2.224677  | H                                      | -2.880004                                | -1.191937 | -0.901762 |
| H | 2.394381  | 3.598694  | 0.934766  | H                                      | -2.843950                                | -0.663095 | 1.670273  |
| C | 2.981917  | 2.252368  | -0.648901 | H                                      | -2.629703                                | -2.008148 | 2.811863  |
| C | 3.004516  | 1.736650  | 1.818417  | H                                      | -4.082910                                | -1.934536 | 1.805698  |
| H | 0.260066  | 3.366154  | -1.360665 | H                                      | 0.442303                                 | -5.609713 | -0.485347 |
| C | 0.000000  | 4.857952  | 0.178984  | H                                      | -1.062971                                | -5.096883 | 0.279329  |
| C | -1.734994 | 3.215184  | -0.631921 | H                                      | 0.470610                                 | -4.977582 | 1.162467  |
| H | -2.394381 | -3.598694 | 0.934766  | H                                      | 2.309966                                 | -3.263487 | 0.301028  |
| C | -2.981917 | -2.252368 | -0.648901 | H                                      | 1.904544                                 | -2.233421 | -1.075336 |
| C | -3.004516 | -1.736650 | 1.818417  | H                                      | 2.130067                                 | -3.986792 | -1.304267 |
| H | -0.260066 | -3.366154 | -1.360665 | H                                      | -0.055989                                | 2.150369  | 5.069458  |
| C | 0.000000  | -4.857952 | 0.178984  | C                                      | 0.000000                                 | 0.000000  | 5.257677  |
| C | 1.734994  | -3.215184 | -0.631921 | H                                      | 0.055989                                 | -2.150369 | 5.069458  |
| H | -0.399854 | -3.252400 | 2.833319  | H                                      | 0.000000                                 | 0.000000  | 6.343483  |
| H | 1.165816  | -2.696539 | 2.224677  | <b>9</b>                               | <b>(at <math>\omega</math>B97XD/BS4)</b> |           |           |
| C | -0.029206 | 1.196380  | 4.553206  | SCF energy in gas phase: -2039.7317659 |                                          |           |           |
| C | 0.029206  | -1.196380 | 4.553206  | Thermal correction to Enthalpy in gas  |                                          |           |           |
| H | 4.048435  | 2.502854  | -0.598771 | phase: 0.756629                        |                                          |           |           |
| H | 2.532901  | 2.832033  | -1.461432 |                                        |                                          |           |           |

Thermal correction to Gibbs Free Energy  
in gas phase: 0.650204

SCF energy in solvent: -3278.03566609

Co 0.550079 0.069813 0.722030  
P 0.359867 2.221148 0.336055  
P 0.820346 -2.088349 0.412615  
H -0.775078 -0.069014 1.478788  
B -1.303571 -0.128310 0.112130  
N 2.398096 0.250601 -0.029594  
H 1.198787 0.158305 2.174069  
O -2.220957 0.911413 -0.166184  
O -1.973652 -1.349172 -0.140760  
C -3.522499 0.359366 -0.364008  
C -3.180828 -1.082149 -0.851099  
C -4.248888 0.371200 0.984407  
C -4.274537 1.221689 -1.370211  
C -4.208417 -2.148432 -0.494173  
C -2.865290 -1.135768 -2.350606  
H -3.716054 -0.242069 1.718374  
H -4.283166 1.398317 1.360348  
H -5.276424 0.002060 0.897243  
H -5.243582 0.775472 -1.621929  
H -4.457672 2.212614 -0.941588  
H -3.698969 1.352113 -2.290075  
H -4.334486 -2.231532 0.587834  
H -5.180766 -1.922330 -0.946943  
H -3.876130 -3.121749 -0.870260  
H -2.437364 -2.114019 -2.592176  
H -3.762964 -0.993860 -2.961839  
H -2.130203 -0.370230 -2.619558  
H 4.501230 2.606786 -1.195257

C 4.881118 0.483128 -1.287351  
H 4.964339 -1.663870 -1.071337  
C 2.152867 2.650954 0.188928  
C -0.248022 3.394550 1.648574  
C -0.322138 2.929431 -1.255497  
C 2.666321 -2.131256 0.321329  
C 0.431475 -3.313955 1.760340  
C 0.337622 -2.981383 -1.156860  
C 2.919296 1.465083 -0.312724  
C 3.168903 -0.838929 -0.246551  
H 2.350706 3.542392 -0.414348  
H 2.510282 2.854528 1.206105  
H 0.093472 4.398372 1.361173  
C 0.335160 3.049486 3.022011  
C -1.779668 3.392649 1.715145  
H -1.379256 2.655391 -1.228730  
C 0.316621 2.192835 -2.436608  
C -0.201658 4.447420 -1.407902  
H 3.024659 -2.187173 1.357181  
H 3.072156 -2.993072 -0.217087  
H 1.019791 -4.217578 1.548580  
C -1.057178 -3.683216 1.756269  
C 0.836903 -2.773283 3.134638  
H -0.754421 -2.975088 -1.125747  
C 0.773275 -2.141799 -2.360399  
C 0.825017 -4.427444 -1.271940  
C 4.140850 1.610532 -0.961573  
C 4.397449 -0.756280 -0.892795  
H 0.069609 2.027079 3.304439  
H 1.427545 3.113999 3.045347  
H -0.056684 3.748134 3.771538

|                                                                |           |           |           |   |           |           |           |
|----------------------------------------------------------------|-----------|-----------|-----------|---|-----------|-----------|-----------|
| H                                                              | -2.145658 | 2.402410  | 2.000726  | P | 1.048549  | -1.957578 | 0.371513  |
| H                                                              | -2.116059 | 4.117894  | 2.465556  | H | -0.410850 | -0.070219 | 1.872734  |
| H                                                              | -2.244382 | 3.649865  | 0.758365  | B | -1.277504 | -0.269601 | 0.086231  |
| H                                                              | 1.373800  | 2.460830  | -2.560309 | N | 2.416815  | 0.525789  | 0.129396  |
| H                                                              | 0.257074  | 1.109539  | -2.289557 | H | 0.788674  | 0.190491  | 2.265942  |
| H                                                              | -0.198979 | 2.447914  | -3.369963 | O | -2.366576 | 0.626394  | 0.078442  |
| H                                                              | 0.840163  | 4.788604  | -1.368411 | O | -1.764120 | -1.508841 | -0.374815 |
| H                                                              | -0.602589 | 4.754638  | -2.381503 | C | -3.583003 | -0.088607 | -0.143042 |
| H                                                              | -0.762352 | 4.987636  | -0.638726 | C | -3.075358 | -1.342280 | -0.917595 |
| H                                                              | -1.374910 | -4.136222 | 0.812041  | C | -4.170979 | -0.434738 | 1.228393  |
| H                                                              | -1.258997 | -4.400119 | 2.560918  | C | -4.547717 | 0.803581  | -0.914245 |
| H                                                              | -1.676498 | -2.795936 | 1.915265  | C | -3.875482 | -2.617487 | -0.685017 |
| H                                                              | 0.606353  | -3.520289 | 3.904285  | C | -2.916313 | -1.088089 | -2.420347 |
| H                                                              | 1.904760  | -2.542502 | 3.198931  | H | -3.486005 | -1.074012 | 1.794723  |
| H                                                              | 0.300043  | -1.846677 | 3.354866  | H | -4.315070 | 0.490089  | 1.795495  |
| H                                                              | 0.435783  | -1.107201 | -2.244498 | H | -5.138044 | -0.941940 | 1.142752  |
| H                                                              | 1.864857  | -2.133157 | -2.474760 | H | -5.463180 | 0.259045  | -1.173103 |
| H                                                              | 0.346663  | -2.546980 | -3.285671 | H | -4.825715 | 1.663886  | -0.296680 |
| H                                                              | 0.441685  | -5.061753 | -0.466500 | H | -4.093911 | 1.180636  | -1.834285 |
| H                                                              | 0.482186  | -4.858934 | -2.220281 | H | -3.873348 | -2.903391 | 0.369399  |
| H                                                              | 1.919396  | -4.498288 | -1.265975 | H | -4.913700 | -2.492504 | -1.013816 |
| H                                                              | 5.828518  | 0.570664  | -1.809813 | H | -3.434017 | -3.439815 | -1.257762 |
| <b>TS<sub>9-10</sub> (at ωB97XD/BS4)</b>                       |           |           |           | H | -2.354530 | -1.917200 | -2.862346 |
| SCF energy in gas phase: -2039.72394303                        |           |           |           | H | -3.884022 | -1.015925 | -2.928475 |
| Thermal correction to Enthalpy in gas phase: 0.75373           |           |           |           | H | -2.353748 | -0.166214 | -2.600544 |
| Thermal correction to Gibbs Free Energy in gas phase: 0.646464 |           |           |           | H | 4.280408  | 3.064078  | -1.060545 |
| SCF energy in solvent: -3278.02620711                          |           |           |           | C | 4.940470  | 1.011251  | -0.960418 |
| Co                                                             | 0.520246  | 0.124953  | 0.718886  | H | 5.264807  | -1.099400 | -0.640463 |
| P                                                              | 0.089692  | 2.201382  | 0.254251  | C | 1.816104  | 2.877284  | 0.086798  |
|                                                                |           |           |           | C | -0.628481 | 3.376253  | 1.519557  |
|                                                                |           |           |           | C | -0.698089 | 2.767184  | -1.347245 |

|   |           |           |           |                                         |                         |           |           |
|---|-----------|-----------|-----------|-----------------------------------------|-------------------------|-----------|-----------|
| C | 2.894523  | -1.815369 | 0.519884  | H                                       | -0.551825               | 2.255438  | -3.454443 |
| C | 0.658143  | -3.311733 | 1.593569  | H                                       | 0.285959                | 4.706257  | -1.635636 |
| C | 0.857904  | -2.789777 | -1.290678 | H                                       | -1.213972               | 4.498815  | -2.537197 |
| C | 2.789822  | 1.776795  | -0.215441 | H                                       | -1.272494               | 4.815439  | -0.801131 |
| C | 3.320223  | -0.472645 | 0.005233  | H                                       | -0.973487               | -4.196388 | 0.410563  |
| H | 1.898388  | 3.686054  | -0.646518 | H                                       | -0.954295               | -4.653054 | 2.125044  |
| H | 2.089443  | 3.305724  | 1.059276  | H                                       | -1.496322               | -3.034508 | 1.623904  |
| H | -0.326359 | 4.386595  | 1.209375  | H                                       | 0.662290                | -3.670012 | 3.726059  |
| C | -0.051843 | 3.100733  | 2.911426  | H                                       | 1.892312                | -2.500301 | 3.226233  |
| C | -2.158849 | 3.316519  | 1.572121  | H                                       | 0.201297                | -2.010416 | 3.272019  |
| H | -1.726920 | 2.402886  | -1.268216 | H                                       | 1.082710                | -0.840927 | -2.228215 |
| C | -0.031048 | 2.035792  | -2.514633 | H                                       | 2.526899                | -1.860219 | -2.354868 |
| C | -0.723069 | 4.279816  | -1.581115 | H                                       | 1.118690                | -2.206792 | -3.368356 |
| H | 3.121674  | -1.849327 | 1.592679  | H                                       | 0.959400                | -4.907228 | -0.718067 |
| H | 3.452504  | -2.624995 | 0.037875  | H                                       | 1.296557                | -4.582455 | -2.420882 |
| H | 1.357351  | -4.133709 | 1.386471  | H                                       | 2.517874                | -4.217353 | -1.202153 |
| C | -0.774510 | -3.830633 | 1.422254  | H                                       | 5.912639                | 1.196276  | -1.406614 |
| C | 0.870305  | -2.842772 | 3.036426  | <b>11</b>                               | (at $\omega$ B97XD/BS4) |           |           |
| H | -0.226536 | -2.832667 | -1.425062 | SCF energy in gas phase:                | -2038.55652806          |           |           |
| C | 1.429606  | -1.868521 | -2.372998 | Thermal correction to Enthalpy in gas   | phase: 0.739764         |           |           |
| C | 1.439369  | -4.200947 | -1.402383 | Thermal correction to Gibbs Free Energy | in gas phase: 0.632453  |           |           |
| C | 4.034172  | 2.045996  | -0.777283 | SCF energy in solvent:                  | -3276.84706231          |           |           |
| H | -0.342952 | 2.103863  | 3.253763  | Co                                      | 0.537587                | 0.031602  | -0.162269 |
| H | 1.042098  | 3.139566  | 2.935743  | P                                       | 0.790687                | -2.066391 | -0.078670 |
| H | -0.430516 | 3.845718  | 3.621945  | P                                       | 0.486059                | 2.133743  | 0.020797  |
| H | -2.491190 | 2.319361  | 1.870761  | B                                       | -1.395795               | -0.090714 | -0.019558 |
| H | -2.529175 | 4.046324  | 2.302298  | N                                       | 2.504432                | 0.169522  | -0.366285 |
| H | -2.623074 | 3.537626  | 0.606096  | O                                       | -2.234563               | -0.052051 | -1.151990 |
| H | 1.016851  | 2.339397  | -2.638672 | O                                       | -2.217838               | -0.220216 | 1.119889  |
| H | -0.049090 | 0.954821  | -2.348747 |                                         |                         |           |           |

|   |           |           |           |   |           |           |           |
|---|-----------|-----------|-----------|---|-----------|-----------|-----------|
| C | -3.597607 | 0.076503  | -0.739776 | H | -1.144910 | -3.321513 | -0.639835 |
| C | -3.562484 | -0.498131 | 0.713611  | C | 0.422443  | -4.689270 | -1.175849 |
| C | -3.955367 | 1.565866  | -0.779830 | C | -0.370934 | -2.686293 | -2.523489 |
| C | -4.484837 | -0.688736 | -1.715291 | H | 1.329063  | -3.876965 | 1.466352  |
| C | -4.525521 | 0.164910  | 1.692307  | C | -0.521286 | -3.039410 | 2.197119  |
| C | -3.757562 | -2.017087 | 0.755187  | C | 1.780345  | -2.053903 | 2.512579  |
| H | -3.366006 | 2.127368  | -0.048094 | H | 2.317136  | 3.010691  | -1.345342 |
| H | -3.724427 | 1.956430  | -1.776128 | H | 2.645105  | 3.385016  | 0.342619  |
| H | -5.017480 | 1.738866  | -0.574365 | H | -1.523270 | 3.067052  | -0.824878 |
| H | -5.528264 | -0.692781 | -1.378500 | C | -0.385746 | 2.620657  | -2.564597 |
| H | -4.445889 | -0.210771 | -2.699450 | C | -0.149296 | 4.694041  | -1.105753 |
| H | -4.148816 | -1.721921 | -1.831054 | H | 0.611468  | 3.936243  | 1.656386  |
| H | -4.317609 | 1.232305  | 1.798672  | C | -1.289574 | 2.988383  | 2.031565  |
| H | -5.564268 | 0.040965  | 1.363975  | C | 0.961238  | 2.108775  | 2.743629  |
| H | -4.422414 | -0.297214 | 2.679341  | C | 4.656551  | -0.900881 | -0.347889 |
| H | -3.526031 | -2.379587 | 1.761204  | C | 4.510932  | 1.474262  | -0.159306 |
| H | -4.786356 | -2.303089 | 0.510996  | H | 1.421497  | -4.691171 | -1.628530 |
| H | -3.081827 | -2.514489 | 0.052383  | H | 0.500446  | -5.142156 | -0.181968 |
| H | 5.227878  | -1.821936 | -0.399786 | H | -0.213867 | -5.340386 | -1.787142 |
| C | 5.288390  | 0.324627  | -0.183955 | H | 0.581157  | -2.565071 | -3.055553 |
| H | 4.966084  | 2.454479  | -0.060743 | H | -0.997872 | -3.356211 | -3.124780 |
| C | 2.548261  | -2.251865 | -0.681111 | H | -0.859621 | -1.709522 | -2.462806 |
| C | -0.160982 | -3.275590 | -1.124292 | H | -1.037725 | -2.074198 | 2.231993  |
| C | 0.877383  | -2.883491 | 1.593620  | H | -1.141556 | -3.732259 | 1.617451  |
| C | 2.261847  | 2.605426  | -0.326091 | H | -0.449167 | -3.436589 | 3.217072  |
| C | -0.485398 | 3.202276  | -1.150847 | H | 1.376344  | -1.043251 | 2.630792  |
| C | 0.201433  | 2.917160  | 1.687271  | H | 1.846085  | -2.521462 | 3.502505  |
| C | 3.270062  | -0.949862 | -0.449809 | H | 2.798621  | -1.959754 | 2.118205  |
| C | 3.127192  | 1.371843  | -0.268704 | H | -0.722440 | 1.579707  | -2.569833 |
| H | 3.093573  | -3.092053 | -0.235594 | H | -1.011910 | 3.197466  | -3.256574 |
| H | 2.503562  | -2.433325 | -1.763268 | H | 0.642764  | 2.654306  | -2.946095 |

|                                                                |           |           |           |   |           |           |           |
|----------------------------------------------------------------|-----------|-----------|-----------|---|-----------|-----------|-----------|
| H                                                              | -0.794783 | 5.249789  | -1.796525 | C | 3.809863  | -1.504575 | 1.462623  |
| H                                                              | -0.290746 | 5.119029  | -0.106206 | H | 4.321628  | -2.906328 | -0.749776 |
| H                                                              | 0.888229  | 4.881849  | -1.407879 | H | 5.540403  | -1.618056 | -0.757330 |
| H                                                              | -1.835013 | 3.658535  | 1.357408  | H | 4.237745  | -1.627123 | -1.968993 |
| H                                                              | -1.745466 | 1.993438  | 1.978756  | H | 3.196094  | -0.924223 | 2.158627  |
| H                                                              | -1.420084 | 3.371614  | 3.050971  | H | 4.857974  | -1.427765 | 1.770620  |
| H                                                              | 2.027156  | 2.012270  | 2.505382  | H | 3.504393  | -2.553267 | 1.536779  |
| H                                                              | 0.876093  | 2.587289  | 3.726956  | H | 4.720261  | 2.268062  | 0.650908  |
| H                                                              | 0.541219  | 1.099646  | 2.809767  | H | 5.724401  | 0.806205  | 0.668025  |
| H                                                              | 6.368559  | 0.383600  | -0.092092 | H | 4.430069  | 1.019970  | 1.870078  |
| <b>TS<sub>2-12</sub></b> (at ωB97XD/BS4)                       |           |           |           | H | 3.324193  | 0.482405  | -2.266383 |
| SCF energy in gas phase: -2039.69758865                        |           |           |           | H | 5.040015  | 0.729533  | -1.863600 |
| Thermal correction to Enthalpy in gas phase: 0.750364          |           |           |           | H | 3.867538  | 2.045485  | -1.638986 |
| Thermal correction to Gibbs Free Energy in gas phase: 0.643656 |           |           |           | C | -2.035898 | 2.252671  | -0.909553 |
| SCF energy in solvent: -3278.00231411                          |           |           |           | C | -0.678099 | 3.082278  | 1.687319  |
| Co                                                             | -0.415349 | 0.045729  | -0.028426 | C | 0.684223  | 3.315836  | -0.911623 |
| P                                                              | -0.495641 | 2.248742  | 0.040196  | C | -1.134067 | -2.967832 | -1.570437 |
| B                                                              | 1.499994  | -0.081837 | -0.060245 | C | 0.245761  | -3.304486 | 1.001485  |
| H                                                              | -0.673043 | 0.341944  | -1.728196 | C | -2.447425 | -2.105295 | 0.913678  |
| P                                                              | -0.803091 | -2.106836 | 0.042376  | C | -2.985029 | 1.290960  | -0.424538 |
| H                                                              | 0.058627  | -0.075143 | 1.372920  | C | -3.208632 | -0.882735 | 0.464553  |
| N                                                              | -2.436556 | 0.157316  | 0.094495  | H | -2.438468 | 3.174931  | -1.327904 |
| O                                                              | 2.226488  | -1.251568 | -0.309790 | H | -1.235751 | 1.145708  | -1.668643 |
| O                                                              | 2.398263  | 0.957906  | 0.197576  | H | -1.016673 | 4.111162  | 1.510388  |
| C                                                              | 3.603390  | -1.027286 | 0.022313  | C | 0.678913  | 3.106842  | 2.401645  |
| C                                                              | 3.724393  | 0.523153  | -0.126303 | C | -1.733118 | 2.364859  | 2.535418  |
| C                                                              | 4.709207  | 1.187676  | 0.827365  | H | 1.636700  | 3.185653  | -0.387437 |
| C                                                              | 4.012719  | 0.963164  | -1.564446 | C | 0.294238  | 4.797817  | -0.908692 |
| C                                                              | 4.479511  | -1.837066 | -0.924667 | C | 0.871193  | 2.797849  | -2.340050 |
|                                                                |           |           |           | H | -1.460413 | -3.990463 | -1.342630 |
|                                                                |           |           |           | C | 0.162812  | -3.016573 | -2.386098 |

C -2.251470 -2.275691 -2.358092  
 H 1.200407 -3.280276 0.465221  
 C -0.294033 -4.738120 1.023669  
 C 0.509539 -2.797769 2.422694  
 H -3.029551 -3.019472 0.754040  
 H -2.231187 -2.025894 1.986282  
 C -4.391238 1.387423 -0.541174  
 C -4.587417 -0.830707 0.383362  
 H 0.565674 3.523477 3.409603  
 H 1.416630 3.715536 1.868486  
 H 1.084889 2.092920 2.487452  
 H -1.458784 1.315064 2.683323  
 H -2.720692 2.393828 2.065126  
 H -1.810871 2.847046 3.517409  
 H 1.011603 5.371983 -1.507163  
 H 0.290779 5.226005 0.098670  
 H -0.698229 4.952038 -1.348067  
 H -0.053863 2.887360 -2.920299  
 H 1.172405 1.748092 -2.342328  
 H 1.647803 3.383708 -2.846174  
 H -0.017585 -3.511037 -3.347801  
 H 0.960000 -3.560137 -1.868850  
 H 0.526740 -2.001598 -2.577606  
 H -2.008325 -1.223606 -2.536094  
 H -3.212798 -2.317073 -1.836321  
 H -2.375780 -2.769796 -3.328838  
 H 0.360064 -5.370625 1.635244  
 H -0.337571 -5.183805 0.025557  
 H -1.297730 -4.785120 1.463497  
 H -0.398354 -2.821896 3.037352  
 H 0.888869 -1.773963 2.416343

H 1.251779 -3.439749 2.911386  
 H -4.828864 2.291166 -0.951913  
 C -5.177816 0.336522 -0.126684  
 H -5.189367 -1.677657 0.693986  
 H -6.259592 0.405278 -0.202194

**12** (at  $\omega$ B97XD/BS4)

SCF energy in gas phase: -2038.55357575

Thermal correction to Enthalpy in gas phase: 0.737675

Thermal correction to Gibbs Free Energy in gas phase: 0.629887

SCF energy in solvent: -3276.85178263

Co -0.538122 0.007292 0.452916  
 P -0.901012 2.213740 0.246197  
 B 1.451886 0.111742 0.293718  
 P -0.476687 -2.186463 0.161543  
 H 0.679703 0.189431 1.377246  
 N -2.438779 -0.181487 0.010222  
 O 2.287170 -1.002472 0.182307  
 O 2.166738 1.266586 0.003774  
 C 3.639387 -0.538377 0.040550  
 C 3.432070 0.891882 -0.557179  
 C 4.473779 1.920406 -0.136551  
 C 3.282388 0.892995 -2.080115  
 C 4.413131 -1.501824 -0.848809  
 C 4.249631 -0.516640 1.444694  
 H 4.477838 -2.480989 -0.363513  
 H 5.432776 -1.136174 -1.014048  
 H 3.930333 -1.636613 -1.818850  
 H 3.711322 0.180184 2.095195  
 H 5.306389 -0.231231 1.424439

|   |           |           |           |                                               |           |           |                |
|---|-----------|-----------|-----------|-----------------------------------------------|-----------|-----------|----------------|
| H | 4.168889  | -1.517422 | 1.879916  | C                                             | -4.386760 | -1.576371 | -0.294109      |
| H | 4.242905  | 2.886590  | -0.595890 | H                                             | 0.873061  | 4.113818  | 3.006357       |
| H | 5.473931  | 1.616357  | -0.465361 | H                                             | 1.255845  | 4.156481  | 1.277580       |
| H | 4.485371  | 2.056584  | 0.947090  | H                                             | 1.355436  | 2.629805  | 2.158034       |
| H | 2.542951  | 0.155292  | -2.407608 | H                                             | -0.857726 | 1.619110  | 3.167474       |
| H | 4.233587  | 0.681931  | -2.579388 | H                                             | -2.415071 | 2.324788  | 2.701552       |
| H | 2.932270  | 1.878741  | -2.400557 | H                                             | -1.350156 | 3.191078  | 3.833042       |
| C | -2.602319 | 2.206220  | -0.196396 | H                                             | 0.037336  | 5.034508  | -2.124119      |
| C | -0.689266 | 3.268671  | 1.762080  | H                                             | -0.389194 | 5.160623  | -0.412208      |
| C | -0.000172 | 3.118134  | -1.108762 | H                                             | -1.574918 | 4.546972  | -1.581550      |
| C | -0.309020 | -2.825441 | -1.581734 | H                                             | -1.161461 | 2.179194  | -2.690227      |
| C | 0.503970  | -3.355910 | 1.213747  | H                                             | 0.317185  | 1.300832  | -2.261096      |
| C | -2.242381 | -2.555989 | 0.530194  | H                                             | 0.421290  | 2.794330  | -3.217656      |
| C | -3.187232 | 0.960852  | -0.289892 | H                                             | 1.177940  | -3.347322 | -3.057267      |
| C | -3.071972 | -1.390687 | 0.050296  | H                                             | 1.760124  | -3.544239 | -1.395176      |
| H | -3.179920 | 3.098256  | -0.415971 | H                                             | 1.601377  | -1.926436 | -2.080350      |
| H | -1.212758 | 4.216138  | 1.576069  | H                                             | -0.795622 | -0.919149 | -2.519838      |
| C | 0.783361  | 3.559305  | 2.064239  | H                                             | -2.197979 | -1.971329 | -2.309702      |
| C | -1.371947 | 2.560143  | 2.936129  | H                                             | -1.007882 | -2.336946 | -3.570613      |
| H | 1.050622  | 3.141535  | -0.806927 | H                                             | 0.712708  | -5.454698 | 1.710473       |
| C | -0.512952 | 4.545797  | -1.310483 | H                                             | 0.133421  | -5.184670 | 0.062637       |
| C | -0.112234 | 2.298775  | -2.396843 | H                                             | -0.961854 | -4.959294 | 1.439255       |
| H | -0.737800 | -3.837064 | -1.573404 | H                                             | -0.521166 | -2.893989 | 3.094333       |
| C | 1.144717  | -2.918399 | -2.048937 | H                                             | 0.868404  | -1.849868 | 2.744184       |
| C | -1.130639 | -1.961711 | -2.547659 | H                                             | 1.120106  | -3.521828 | 3.286520       |
| H | 1.528883  | -3.246987 | 0.844633  | H                                             | -5.121270 | 1.673441  | -0.973819      |
| C | 0.068563  | -4.818221 | 1.092481  | C                                             | -5.138932 | -0.442011 | -0.692272      |
| C | 0.488989  | -2.872978 | 2.668019  | H                                             | -4.833057 | -2.562817 | -0.243101      |
| H | -2.593338 | -3.498448 | 0.096117  | H                                             | -6.177719 | -0.558560 | -0.990601      |
| H | -2.334712 | -2.637730 | 1.620786  | <b>2<sup>Ir</sup></b> (at $\omega$ B97XD/BS4) |           |           |                |
| C | -4.562967 | 0.788132  | -0.687309 | SCF energy in gas phase:                      |           |           | -1999.48832027 |

|                                                                |   |           |           |           |
|----------------------------------------------------------------|---|-----------|-----------|-----------|
| Thermal correction to Enthalpy in gas phase: 0.756808          | H | -0.411861 | 2.768511  | -3.884547 |
|                                                                | C | 1.079028  | 2.186659  | 2.369293  |
| Thermal correction to Gibbs Free Energy in gas phase: 0.649613 | C | 3.299728  | 1.262276  | 0.668430  |
| SCF energy in solvent: -1999.75647353                          | C | 1.437506  | 3.281099  | -0.334611 |
| Ir                                                             | C | -3.299728 | -1.262276 | 0.668430  |
| P                                                              | C | -1.437506 | -3.281099 | -0.334611 |
| B                                                              | C | -1.079028 | -2.186659 | 2.369293  |
| H                                                              | C | 0.547953  | 1.035135  | 3.192440  |
| P                                                              | C | -0.547953 | -1.035135 | 3.192440  |
| H                                                              | H | 1.909381  | 2.682425  | 2.884091  |
| N                                                              | H | 0.270022  | 2.923245  | 2.270850  |
| O                                                              | H | 3.855921  | 2.184552  | 0.880054  |
| O                                                              | C | 3.732221  | 0.708754  | -0.693906 |
| C                                                              | C | 3.589361  | 0.249956  | 1.780786  |
| C                                                              | H | 1.927986  | 3.022130  | -1.280683 |
| C                                                              | C | 2.198054  | 4.431244  | 0.334577  |
| C                                                              | C | 0.000000  | 3.686858  | -0.666507 |
| C                                                              | H | -3.855921 | -2.184552 | 0.880054  |
| C                                                              | C | -3.732221 | -0.708754 | -0.693906 |
| C                                                              | C | -3.589361 | -0.249956 | 1.780786  |
| H                                                              | H | -1.927986 | -3.022130 | -1.280683 |
| H                                                              | C | -2.198054 | -4.431244 | 0.334577  |
| H                                                              | C | 0.000000  | -3.686858 | -0.666507 |
| H                                                              | H | -1.909381 | -2.682425 | 2.884091  |
| H                                                              | H | -0.270022 | -2.923245 | 2.270850  |
| H                                                              | C | 0.572634  | 1.053995  | 4.584515  |
| H                                                              | C | -0.572634 | -1.053995 | 4.584515  |
| H                                                              | H | 4.801617  | 0.466938  | -0.677222 |
| H                                                              | H | 3.556205  | 1.418249  | -1.508400 |
| H                                                              | H | 3.166933  | -0.201133 | -0.920059 |
| H                                                              | H | 2.986637  | -0.652977 | 1.635337  |

|                                                                |           |           |           |    |           |           |           |
|----------------------------------------------------------------|-----------|-----------|-----------|----|-----------|-----------|-----------|
| H                                                              | 3.373928  | 0.652897  | 2.776940  | Ir | 0.379959  | -0.008441 | -0.639681 |
| H                                                              | 4.648148  | -0.033532 | 1.759882  | P  | 0.567778  | -2.231613 | -0.192399 |
| H                                                              | 2.199638  | 5.307800  | -0.323497 | P  | 0.620808  | 2.217762  | -0.248188 |
| H                                                              | 3.241600  | 4.183781  | 0.552586  | H  | -0.053790 | -0.047452 | -2.538591 |
| H                                                              | 1.716907  | 4.731584  | 1.273216  | B  | -1.579543 | 0.022005  | -0.159843 |
| H                                                              | -0.585092 | 3.887439  | 0.239051  | N  | 2.560471  | -0.035405 | -0.075078 |
| H                                                              | -0.504306 | 2.893758  | -1.219610 | H  | 0.673215  | -0.065498 | -2.865652 |
| H                                                              | 0.006891  | 4.602147  | -1.271134 | O  | -2.380342 | -1.103498 | 0.148668  |
| H                                                              | -4.801617 | -0.466938 | -0.677222 | O  | -2.373403 | 1.171334  | 0.077335  |
| H                                                              | -3.556205 | -1.418249 | -1.508400 | C  | -3.726702 | -0.691993 | 0.372391  |
| H                                                              | -3.166933 | 0.201133  | -0.920059 | C  | -3.539884 | 0.795277  | 0.807127  |
| H                                                              | -2.986637 | 0.652977  | 1.635337  | C  | -4.480349 | -0.831535 | -0.954408 |
| H                                                              | -3.373928 | -0.652897 | 2.776940  | C  | -4.354359 | -1.599652 | 1.423744  |
| H                                                              | -4.648148 | 0.033532  | 1.759882  | C  | -4.684551 | 1.728636  | 0.433625  |
| H                                                              | -2.199638 | -5.307800 | -0.323497 | C  | -3.216068 | 0.933336  | 2.299555  |
| H                                                              | -3.241600 | -4.183781 | 0.552586  | H  | -4.044159 | -0.177942 | -1.716411 |
| H                                                              | -1.716907 | -4.731584 | 1.273216  | H  | -4.391743 | -1.865352 | -1.303108 |
| H                                                              | 0.585092  | -3.887439 | 0.239051  | H  | -5.544219 | -0.591653 | -0.850012 |
| H                                                              | 0.504306  | -2.893758 | -1.219610 | H  | -5.362011 | -1.258032 | 1.688167  |
| H                                                              | -0.006891 | -4.602147 | -1.271134 | H  | -4.432755 | -2.618457 | 1.029798  |
| H                                                              | 1.022279  | 1.892693  | 5.105584  | H  | -3.746908 | -1.634950 | 2.331634  |
| C                                                              | 0.000000  | 0.000000  | 5.285639  | H  | -4.836100 | 1.756602  | -0.648052 |
| H                                                              | -1.022279 | -1.892693 | 5.105584  | H  | -5.619492 | 1.414978  | 0.912675  |
| H                                                              | 0.000000  | 0.000000  | 6.371384  | H  | -4.454540 | 2.745823  | 0.767848  |
| <b>TS<sub>9-10</sub><sup>Ir</sup> (at ωB97XD/BS4)</b>          |           |           |           | H  | -2.898434 | 1.961318  | 2.502543  |
| SCF energy in gas phase: -1999.43198195                        |           |           |           | H  | -4.083680 | 0.711157  | 2.930401  |
| Thermal correction to Enthalpy in gas phase: 0.754066          |           |           |           | H  | -2.395015 | 0.265407  | 2.579750  |
| Thermal correction to Gibbs Free Energy in gas phase: 0.643945 |           |           |           | H  | 4.751889  | -2.208391 | 1.262729  |
| SCF energy in solvent: -1999.69896265                          |           |           |           | C  | 4.937218  | -0.060920 | 1.360669  |
|                                                                |           |           |           | H  | 4.795572  | 2.090184  | 1.266115  |
|                                                                |           |           |           | C  | 2.424326  | -2.468311 | -0.151787 |

|   |           |           |           |                                                                |           |           |           |
|---|-----------|-----------|-----------|----------------------------------------------------------------|-----------|-----------|-----------|
| C | 0.035916  | -3.586121 | -1.362734 | H                                                              | 1.788064  | -2.315926 | 2.649908  |
| C | 0.023601  | -2.856390 | 1.479203  | H                                                              | 0.660400  | -0.977387 | 2.366156  |
| C | 2.482176  | 2.401465  | -0.157243 | H                                                              | 0.266165  | -2.249195 | 3.549371  |
| C | 0.185241  | 3.541972  | -1.494017 | H                                                              | 1.252335  | -4.662655 | 1.610247  |
| C | 0.016264  | 2.948083  | 1.357653  | H                                                              | -0.105363 | -4.612648 | 2.735816  |
| C | 3.132473  | -1.208463 | 0.271091  | H                                                              | -0.393823 | -4.968198 | 1.030671  |
| C | 3.157025  | 1.125444  | 0.271190  | H                                                              | -1.619027 | 4.317218  | -0.506806 |
| H | 2.733974  | -3.313778 | 0.471816  | H                                                              | -1.572828 | 4.550571  | -2.260107 |
| H | 2.728991  | -2.700664 | -1.179452 | H                                                              | -1.905158 | 2.941606  | -1.569908 |
| H | 0.496575  | -4.520608 | -1.014699 | H                                                              | 0.418445  | 3.942603  | -3.608380 |
| C | 0.506943  | -3.312406 | -2.793675 | H                                                              | 1.635455  | 2.817171  | -2.987829 |
| C | -1.490354 | -3.735918 | -1.346483 | H                                                              | -0.021765 | 2.263880  | -3.233532 |
| H | -1.042649 | -2.602712 | 1.497135  | H                                                              | 0.057353  | 1.033708  | 2.363277  |
| C | 0.726023  | -2.048413 | 2.574697  | H                                                              | 1.514008  | 2.002863  | 2.640450  |
| C | 0.203121  | -4.358245 | 1.714687  | H                                                              | 0.004498  | 2.433156  | 3.465077  |
| H | 2.815520  | 2.638037  | -1.175782 | H                                                              | 0.092527  | 5.080966  | 0.819963  |
| H | 2.797839  | 3.235082  | 0.478203  | H                                                              | -0.026640 | 4.751647  | 2.550323  |
| H | 0.752418  | 4.444705  | -1.227937 | H                                                              | 1.507879  | 4.508530  | 1.718907  |
| C | -1.315639 | 3.855808  | -1.451585 | H                                                              | 5.860723  | -0.070581 | 1.931320  |
| C | 0.584123  | 3.114677  | -2.908990 | <b>11<sup>Ir</sup></b> (at ωB97XD/BS4)                         |           |           |           |
| H | -1.072493 | 2.884415  | 1.252292  | SCF energy in gas phase: -1998.26866106                        |           |           |           |
| C | 0.422795  | 2.049489  | 2.526594  | Thermal correction to Enthalpy in gas phase: 0.73969           |           |           |           |
| C | 0.421441  | 4.402237  | 1.612460  | Thermal correction to Gibbs Free Energy in gas phase: 0.629114 |           |           |           |
| C | 4.322965  | -1.249623 | 0.991076  | SCF energy in solvent: -1998.53114366                          |           |           |           |
| C | 4.346637  | 1.140965  | 0.993276  | Ir                                                             | 0.355808  | -0.004596 | -0.146760 |
| H | 0.059647  | -2.389577 | -3.174409 | P                                                              | 0.555462  | -2.243356 | 0.010255  |
| H | 1.594351  | -3.214944 | -2.877745 | P                                                              | 0.696393  | 2.218761  | -0.050103 |
| H | 0.199723  | -4.136961 | -3.447745 | B                                                              | -1.660169 | 0.052310  | 0.004268  |
| H | -1.791489 | -4.536752 | -2.032585 | N                                                              | 2.534445  | -0.074927 | -0.384107 |
| H | -1.881209 | -3.972640 | -0.352593 |                                                                |           |           |           |
| H | -1.965816 | -2.802196 | -1.658990 |                                                                |           |           |           |

|   |           |           |           |   |           |           |           |
|---|-----------|-----------|-----------|---|-----------|-----------|-----------|
| O | -2.520779 | -1.070955 | 0.060960  | H | 2.806227  | -3.360906 | 0.027588  |
| O | -2.477556 | 1.207022  | -0.014562 | H | 2.326128  | -2.776345 | -1.563204 |
| C | -3.859184 | -0.654986 | -0.200788 | H | -1.433266 | -3.303934 | -0.642775 |
| C | -3.830269 | 0.839684  | 0.251509  | C | 0.021259  | -4.863297 | -1.012442 |
| C | -4.098102 | -0.814498 | -1.706662 | C | -0.479928 | -2.856675 | -2.490277 |
| C | -4.822304 | -1.545244 | 0.575558  | H | 0.921316  | -4.028436 | 1.619431  |
| C | -4.762851 | 1.763584  | -0.523074 | C | -0.933970 | -3.099615 | 2.218433  |
| C | -4.063355 | 1.007339  | 1.757119  | C | 1.382408  | -2.200325 | 2.658019  |
| H | -3.421262 | -0.168119 | -2.274668 | H | 2.486151  | 2.594690  | -1.646398 |
| H | -3.887645 | -1.851615 | -1.987268 | H | 3.010267  | 3.199887  | -0.077191 |
| H | -5.130691 | -0.580647 | -1.988513 | H | -1.231502 | 3.375862  | -0.727398 |
| H | -5.855369 | -1.193708 | 0.468936  | C | -0.291341 | 2.856423  | -2.563130 |
| H | -4.769965 | -2.569118 | 0.190512  | C | 0.305251  | 4.851733  | -1.108080 |
| H | -4.568444 | -1.572347 | 1.638038  | H | 1.139270  | 4.024213  | 1.518986  |
| H | -4.510501 | 1.780743  | -1.586053 | C | -0.721005 | 3.140290  | 2.172060  |
| H | -5.807453 | 1.448723  | -0.414057 | C | 1.585244  | 2.206575  | 2.581368  |
| H | -4.673600 | 2.785001  | -0.138316 | C | 4.556216  | -1.332864 | -0.201650 |
| H | -3.822463 | 2.037534  | 2.038072  | C | 4.630360  | 1.060794  | -0.240478 |
| H | -5.102639 | 0.804851  | 2.038513  | H | 1.049911  | -4.981345 | -1.375752 |
| H | -3.407588 | 0.339672  | 2.325603  | H | -0.030248 | -5.279398 | -0.000887 |
| H | 5.045428  | -2.299903 | -0.150079 | H | -0.622952 | -5.476322 | -1.654067 |
| C | 5.291403  | -0.156272 | -0.135221 | H | 0.503305  | -2.883628 | -2.977209 |
| H | 5.178560  | 1.996850  | -0.219762 | H | -1.163599 | -3.462226 | -3.097349 |
| C | 2.338600  | -2.519054 | -0.495423 | H | -0.829455 | -1.819739 | -2.489302 |
| C | -0.423499 | -3.400683 | -1.059633 | H | -1.412663 | -2.116009 | 2.186092  |
| C | 0.505361  | -3.014767 | 1.701847  | H | -1.546052 | -3.781772 | 1.619593  |
| C | 2.489429  | 2.371745  | -0.570975 | H | -0.939579 | -3.463669 | 3.252962  |
| C | -0.215183 | 3.413704  | -1.138221 | H | 0.987995  | -1.182890 | 2.749664  |
| C | 0.705205  | 3.020850  | 1.627595  | H | 1.394668  | -2.666097 | 3.650773  |
| C | 3.172589  | -1.266810 | -0.340239 | H | 2.418965  | -2.123774 | 2.309198  |
| C | 3.245169  | 1.076051  | -0.377533 | H | -0.684694 | 1.835390  | -2.552813 |

|                                                                |           |           |           |   |           |           |           |
|----------------------------------------------------------------|-----------|-----------|-----------|---|-----------|-----------|-----------|
| H                                                              | -0.947220 | 3.484011  | -3.178082 | C | 4.197157  | -0.981542 | 1.624608  |
| H                                                              | 0.693274  | 2.837322  | -3.047649 | C | 4.926486  | 1.521176  | 0.324439  |
| H                                                              | -0.297197 | 5.486281  | -1.769019 | C | 4.061919  | 0.736730  | -1.889069 |
| H                                                              | 0.261458  | 5.287597  | -0.104632 | H | 4.870698  | 2.533611  | -0.088386 |
| H                                                              | 1.343620  | 4.909545  | -1.458202 | H | 5.944374  | 1.145199  | 0.168580  |
| H                                                              | -1.345647 | 3.793054  | 1.553702  | H | 4.735790  | 1.583891  | 1.398333  |
| H                                                              | -1.199686 | 2.156676  | 2.198970  | H | 3.339126  | 0.092435  | -2.400577 |
| H                                                              | -0.702488 | 3.553624  | 3.187743  | H | 5.070661  | 0.465669  | -2.218581 |
| H                                                              | 2.617871  | 2.119606  | 2.223847  | H | 3.864138  | 1.770241  | -2.189972 |
| H                                                              | 1.611225  | 2.680724  | 3.569848  | H | 4.643619  | -2.828347 | -0.250558 |
| H                                                              | 1.184259  | 1.193005  | 2.686763  | H | 5.788293  | -1.530576 | -0.639069 |
| H                                                              | 6.370296  | -0.187811 | -0.017841 | H | 4.411269  | -1.862742 | -1.715355 |
| <b>TS<sub>2-12</sub><sup>Ir</sup> (at ωB97XD/BS4)</b>          |           |           |           | H | 3.590861  | -0.285989 | 2.214009  |
| SCF energy in gas phase: -1999.42058399                        |           |           |           | H | 5.255291  | -0.791720 | 1.834141  |
| Thermal correction to Enthalpy in gas phase: 0.751189          |           |           |           | H | 3.957214  | -1.998887 | 1.949874  |
| Thermal correction to Gibbs Free Energy in gas phase: 0.643952 |           |           |           | C | -2.159607 | 2.197465  | -0.899644 |
| SCF energy in solvent: -1999.69214218                          |           |           |           | C | -0.974870 | 3.134762  | 1.732836  |
| Ir                                                             | -0.301946 | 0.023457  | 0.075561  | C | 0.500615  | 3.460342  | -0.795387 |
| P                                                              | -0.651265 | 2.317510  | 0.099861  | C | -0.735647 | -3.071837 | -1.604652 |
| B                                                              | 1.725389  | -0.021476 | -0.008303 | C | 0.289346  | -3.424919 | 1.111501  |
| H                                                              | -0.602118 | 0.379817  | -1.764193 | C | -2.405259 | -2.289897 | 0.725978  |
| P                                                              | -0.663126 | -2.234833 | 0.052382  | C | -3.058189 | 1.144601  | -0.520650 |
| H                                                              | -0.014789 | -0.111446 | 1.641437  | C | -3.200957 | -1.099931 | 0.237603  |
| N                                                              | -2.490110 | 0.025082  | 0.013347  | H | -2.618958 | 3.097920  | -1.306364 |
| O                                                              | 2.588320  | 1.081515  | -0.044930 | H | -1.202747 | 1.120813  | -1.680528 |
| O                                                              | 2.497046  | -1.195491 | -0.036546 | H | -1.362166 | 4.140311  | 1.525115  |
| C                                                              | 3.905887  | 0.627791  | -0.368921 | C | 0.332250  | 3.243433  | 2.526135  |
| C                                                              | 3.875118  | -0.851784 | 0.132746  | C | -2.037549 | 2.363343  | 2.520981  |
| C                                                              | 4.731891  | -1.821408 | -0.671663 | H | 1.433557  | 3.384234  | -0.225227 |
|                                                                |           |           |           | C | 0.017406  | 4.914360  | -0.809701 |
|                                                                |           |           |           | C | 0.798137  | 2.959093  | -2.211014 |

H -0.888139 -4.144275 -1.427617  
C 0.598382 -2.866825 -2.333749  
C -1.900841 -2.546624 -2.449245  
H 1.202596 -3.607880 0.532426  
C -0.441179 -4.752164 1.345073  
C 0.707584 -2.783207 2.436574  
H -2.923769 -3.228313 0.503488  
H -2.291688 -2.222847 1.816425  
C -4.453133 1.137715 -0.771923  
C -4.560029 -1.147833 -0.000994  
H 0.138770 3.676114 3.514787  
H 1.071698 3.875796 2.023745  
H 0.776236 2.251078 2.664312  
H -1.703326 1.340459 2.722597  
H -2.985293 2.309183 1.976925  
H -2.223307 2.862641 3.479392  
H 0.725869 5.535723 -1.369993  
H -0.065198 5.337701 0.196330  
H -0.959148 5.005796 -1.299666  
H -0.104885 2.952024 -2.831612  
H 1.213941 1.949987 -2.185722  
H 1.530795 3.622512 -2.685835  
H 0.595854 -3.424454 -3.277607  
H 1.457958 -3.193904 -1.741306  
H 0.744831 -1.804532 -2.555713  
H -1.827338 -1.461774 -2.582436  
H -2.874464 -2.767018 -2.000694  
H -1.875708 -3.011178 -3.441641  
H 0.218383 -5.452089 1.870480  
H -0.757961 -5.234630 0.414932  
H -1.329325 -4.608209 1.971361

H -0.161461 -2.469630 3.027455  
H 1.331276 -1.906299 2.257602  
H 1.274779 -3.506372 3.034802  
H -4.921965 2.026557 -1.180615  
C -5.186407 0.005359 -0.504765  
H -5.122232 -2.055200 0.190044  
H -6.256343 -0.003345 -0.693855

**12<sup>Ir</sup>** (at ωB97XD/BS4)

SCF energy in gas phase: -1998.26507384

Thermal correction to Enthalpy in gas phase: 0.736895

Thermal correction to Gibbs Free Energy in gas phase: 0.628488

SCF energy in solvent: -1998.5355464

Ir -0.413793 0.010594 0.400442  
P -0.839679 2.295585 0.215101  
B 1.593652 0.097925 0.095895  
P -0.489443 -2.278045 0.146330  
H 0.765086 0.152918 1.497772  
N -2.405340 -0.132879 -0.242307  
O 2.334700 1.251831 -0.155397  
O 2.443550 -1.015775 0.044371  
C 3.620059 0.865847 -0.654603  
C 3.798095 -0.550000 -0.019767  
C 4.630037 -1.524825 -0.842187  
C 4.323319 -0.495328 1.417650  
C 4.648746 1.900740 -0.219687  
C 3.525040 0.826384 -2.182266  
H 4.440955 2.856393 -0.711344  
H 5.660148 1.585580 -0.500505  
H 4.617594 2.062901 0.860136

|   |           |           |           |   |           |           |           |
|---|-----------|-----------|-----------|---|-----------|-----------|-----------|
| H | 2.800465  | 0.073638  | -2.511162 | H | -2.547571 | -2.592628 | 1.353707  |
| H | 4.493196  | 0.608329  | -2.645018 | C | -4.426255 | 0.902184  | -1.105740 |
| H | 3.179806  | 1.801286  | -2.539295 | C | -4.321331 | -1.483471 | -0.784230 |
| H | 4.666302  | -2.495841 | -0.337993 | H | 0.729592  | 4.049134  | 3.164174  |
| H | 5.657094  | -1.158318 | -0.950864 | H | 1.255968  | 4.128600  | 1.475062  |
| H | 4.208884  | -1.677428 | -1.838506 | H | 1.217229  | 2.570268  | 2.309429  |
| H | 3.744714  | 0.214569  | 2.017370  | H | -1.107081 | 1.648457  | 3.126545  |
| H | 5.379157  | -0.207676 | 1.455276  | H | -2.591896 | 2.411364  | 2.531426  |
| H | 4.217591  | -1.486191 | 1.869874  | H | -1.606541 | 3.230802  | 3.764914  |
| C | -2.505644 | 2.273488  | -0.374712 | H | 0.296613  | 5.197139  | -1.951209 |
| C | -0.756203 | 3.306558  | 1.768150  | H | -0.202037 | 5.258091  | -0.256710 |
| C | 0.162906  | 3.238359  | -1.035659 | H | -1.351246 | 4.735982  | -1.504977 |
| C | -0.147522 | -2.995081 | -1.540725 | H | -0.907826 | 2.424284  | -2.748143 |
| C | 0.296269  | -3.439854 | 1.351903  | H | 0.518788  | 1.484992  | -2.271131 |
| C | -2.316957 | -2.530697 | 0.282363  | H | 0.720659  | 3.031574  | -3.121890 |
| C | -3.094119 | 1.042374  | -0.568012 | H | 1.443554  | -3.735381 | -2.794682 |
| C | -3.051834 | -1.340857 | -0.293968 | H | 1.762972  | -3.970588 | -1.069203 |
| H | -3.056549 | 3.175264  | -0.620792 | H | 1.913586  | -2.358907 | -1.767809 |
| H | -1.224320 | 4.276006  | 1.551633  | H | -0.236568 | -1.097860 | -2.602482 |
| C | 0.696435  | 3.528363  | 2.199775  | H | -1.799206 | -1.917446 | -2.511265 |
| C | -1.567277 | 2.608113  | 2.863076  | H | -0.552655 | -2.525799 | -3.614251 |
| H | 1.192270  | 3.211736  | -0.667352 | H | 0.409820  | -5.535869 | 1.890506  |
| C | -0.303271 | 4.688592  | -1.186747 | H | 0.119191  | -5.278440 | 0.165985  |
| C | 0.119786  | 2.498197  | -2.374873 | H | -1.191380 | -5.034941 | 1.335585  |
| H | -0.696950 | -3.946459 | -1.563876 | H | -1.009951 | -3.029785 | 3.058404  |
| C | 1.332012  | -3.281505 | -1.802966 | H | 0.360561  | -1.916692 | 2.910652  |
| C | -0.723478 | -2.078859 | -2.627868 | H | 0.613304  | -3.579152 | 3.490831  |
| H | 1.367457  | -3.328126 | 1.142100  | H | -4.944697 | 1.803890  | -1.414244 |
| C | -0.116059 | -4.902568 | 1.166755  | C | -5.008955 | -0.318239 | -1.219399 |
| C | 0.049643  | -2.957947 | 2.785404  | H | -4.795714 | -2.457568 | -0.805908 |
| H | -2.656984 | -3.461656 | -0.182976 | H | -6.012022 | -0.407027 | -1.628376 |

|                                                                |   |           |           |           |
|----------------------------------------------------------------|---|-----------|-----------|-----------|
| <b>2<sup>Ph</sup></b> (at ωB97XD/BS4)                          | C | -2.508169 | -1.418410 | 2.448770  |
| SCF energy in gas phase: -1860.14543413                        | H | -2.855605 | 1.947688  | -0.787690 |
| Thermal correction to Enthalpy in gas phase: 0.659545          | C | -4.699376 | 0.826848  | -0.879682 |
| Thermal correction to Gibbs Free Energy in gas phase: 0.564933 | C | -2.839113 | 0.780452  | -2.576377 |
| SCF energy in solvent: -3098.38013273                          | H | -3.246625 | -2.380248 | -0.498220 |
| Co                                                             | H | -2.274925 | -1.744479 | -1.837151 |
| 0.000004                                                       | C | 1.146886  | -4.085764 | 0.341609  |
| 0.011035                                                       | C | -1.146774 | -4.085763 | -0.341947 |
| 0.000006                                                       | H | 3.552753  | 1.004575  | -3.256062 |
| P                                                              | H | 3.396000  | 1.880546  | -1.722808 |
| 2.148842                                                       | H | 1.947799  | 1.289006  | -2.542477 |
| -0.166258                                                      | H | 1.434293  | -1.270399 | -2.608266 |
| 0.024241                                                       | H | 2.658169  | -2.404366 | -1.995376 |
| H                                                              | H | 3.008415  | -1.422828 | -3.424426 |
| 0.075906                                                       | H | 5.223077  | 1.483248  | 1.584501  |
| -0.021187                                                      | H | 5.007064  | 1.117186  | -0.128871 |
| 1.551237                                                       | H | 5.049449  | -0.196874 | 1.062655  |
| H                                                              | H | 3.314625  | -0.116586 | 2.993935  |
| -2.148826                                                      | H | 1.759998  | 0.702788  | 2.730000  |
| -0.166316                                                      | H | 3.213266  | 1.640792  | 3.141634  |
| -0.024184                                                      | H | -3.552767 | 1.004155  | 3.256249  |
| H                                                              | H | -3.395990 | 1.880295  | 1.723096  |
| -0.075929                                                      | H | -1.947802 | 1.288667  | 2.542730  |
| -0.021206                                                      | H | -1.434363 | -1.270798 | 2.608282  |
| -1.551246                                                      | H | -2.658236 | -2.404665 | 1.995205  |
| N                                                              | H | -3.008533 | -1.423274 | 3.424342  |
| 0.000018                                                       | H | -5.223093 | 1.483252  | -1.584293 |
| -2.020795                                                      | H | -5.007144 | 1.116793  | 0.129009  |
| -0.000036                                                      | H | -5.049352 | -0.196981 | -1.062839 |
| C                                                              | H | -3.314443 | -0.116136 | -2.993948 |
| 2.310069                                                       | H | -1.759824 | 0.703170  | -2.729700 |
| -1.869479                                                      |   |           |           |           |
| 0.748163                                                       |   |           |           |           |
| C                                                              |   |           |           |           |
| 3.073481                                                       |   |           |           |           |
| -0.289518                                                      |   |           |           |           |
| -1.581392                                                      |   |           |           |           |
| C                                                              |   |           |           |           |
| 3.186977                                                       |   |           |           |           |
| 0.946734                                                       |   |           |           |           |
| 1.092815                                                       |   |           |           |           |
| C                                                              |   |           |           |           |
| -3.073467                                                      |   |           |           |           |
| -0.289754                                                      |   |           |           |           |
| 1.581441                                                       |   |           |           |           |
| C                                                              |   |           |           |           |
| -3.186979                                                      |   |           |           |           |
| 0.946793                                                       |   |           |           |           |
| -1.092604                                                      |   |           |           |           |
| C                                                              |   |           |           |           |
| -2.310030                                                      |   |           |           |           |
| -1.869472                                                      |   |           |           |           |
| -0.748254                                                      |   |           |           |           |
| C                                                              |   |           |           |           |
| 1.115225                                                       |   |           |           |           |
| -2.694125                                                      |   |           |           |           |
| 0.340302                                                       |   |           |           |           |
| C                                                              |   |           |           |           |
| -1.115162                                                      |   |           |           |           |
| -2.694123                                                      |   |           |           |           |
| -0.340466                                                      |   |           |           |           |
| H                                                              |   |           |           |           |
| 3.246676                                                       |   |           |           |           |
| -2.380216                                                      |   |           |           |           |
| 0.498097                                                       |   |           |           |           |
| H                                                              |   |           |           |           |
| 2.274957                                                       |   |           |           |           |
| -1.744570                                                      |   |           |           |           |
| 1.837071                                                       |   |           |           |           |
| H                                                              |   |           |           |           |
| 4.121500                                                       |   |           |           |           |
| -0.520095                                                      |   |           |           |           |
| -1.349754                                                      |   |           |           |           |
| C                                                              |   |           |           |           |
| 2.991695                                                       |   |           |           |           |
| 1.052457                                                       |   |           |           |           |
| -2.315385                                                      |   |           |           |           |
| C                                                              |   |           |           |           |
| 2.508105                                                       |   |           |           |           |
| -1.418058                                                      |   |           |           |           |
| -2.448826                                                      |   |           |           |           |
| H                                                              |   |           |           |           |
| 2.855500                                                       |   |           |           |           |
| 1.947665                                                       |   |           |           |           |
| 0.788126                                                       |   |           |           |           |
| C                                                              |   |           |           |           |
| 4.699374                                                       |   |           |           |           |
| 0.826969                                                       |   |           |           |           |
| 0.879764                                                       |   |           |           |           |
| C                                                              |   |           |           |           |
| 2.839265                                                       |   |           |           |           |
| 0.780082                                                       |   |           |           |           |
| 2.576582                                                       |   |           |           |           |
| H                                                              |   |           |           |           |
| -4.121490                                                      |   |           |           |           |
| -0.520271                                                      |   |           |           |           |
| 1.349745                                                       |   |           |           |           |
| C                                                              |   |           |           |           |
| -2.991690                                                      |   |           |           |           |
| 1.052140                                                       |   |           |           |           |
| 2.315587                                                       |   |           |           |           |

|                                                                |           |           |           |   |           |           |           |
|----------------------------------------------------------------|-----------|-----------|-----------|---|-----------|-----------|-----------|
| H                                                              | -3.213041 | 1.641273  | -3.141301 | H | 2.149589  | 4.454822  | -0.777183 |
| H                                                              | 2.060476  | -4.601884 | 0.617119  | C | -2.409552 | 1.976384  | 0.370258  |
| C                                                              | 0.000068  | -4.789783 | -0.000211 | C | -3.342272 | -0.507121 | 1.653489  |
| H                                                              | -2.060344 | -4.601880 | -0.617531 | C | -2.918018 | -0.349999 | -1.251506 |
| H                                                              | 0.000088  | -5.875491 | -0.000282 | C | 2.409556  | 1.976414  | 0.370024  |
| C                                                              | -0.000038 | 1.950488  | -0.000001 | C | 3.342316  | -0.506943 | 1.653487  |
| C                                                              | -0.100916 | 2.702962  | -1.184806 | C | 2.918014  | -0.350136 | -1.251522 |
| C                                                              | 0.100775  | 2.703001  | 1.184784  | C | -1.162379 | 2.666690  | -0.118905 |
| C                                                              | -0.104120 | 4.098032  | -1.192413 | C | 1.162328  | 2.666699  | -0.119032 |
| H                                                              | -0.177950 | 2.180811  | -2.134465 | H | -3.296940 | 2.302046  | -0.182961 |
| C                                                              | 0.103933  | 4.098072  | 1.192351  | H | -2.549199 | 2.282071  | 1.415027  |
| H                                                              | 0.177783  | 2.180888  | 2.134466  | H | -4.349160 | -0.158396 | 1.389924  |
| C                                                              | -0.000098 | 4.809218  | -0.000042 | C | -3.001128 | -0.006741 | 3.059518  |
| H                                                              | -0.184552 | 4.630852  | -2.137919 | C | -3.310522 | -2.041134 | 1.614000  |
| H                                                              | 0.184329  | 4.630920  | 2.137844  | H | -2.577494 | -1.377803 | -1.416668 |
| H                                                              | -0.000115 | 5.896090  | -0.000060 | C | -2.318476 | 0.527456  | -2.360052 |
| <b>TS<sub>9-10</sub><sup>Ph</sup> (at ωB97XD/BS4)</b>          |           |           |           | C | -4.447239 | -0.306558 | -1.306486 |
| SCF energy in gas phase: -1860.11067741                        |           |           |           | H | 2.549343  | 2.282189  | 1.414748  |
| Thermal correction to Enthalpy in gas phase: 0.655625          |           |           |           | H | 3.296876  | 2.302023  | -0.183336 |
| Thermal correction to Gibbs Free Energy in gas phase: 0.558876 |           |           |           | H | 4.349201  | -0.158275 | 1.389836  |
| SCF energy in solvent: -3098.34361072                          |           |           |           | C | 3.310533  | -2.040961 | 1.614205  |
| Co                                                             | 0.000010  | -0.001403 | 0.635916  | C | 3.001241  | -0.006365 | 3.059461  |
| P                                                              | -2.156279 | 0.136933  | 0.379218  | H | 2.577436  | -1.377933 | -1.416608 |
| P                                                              | 2.156290  | 0.136959  | 0.379163  | C | 2.318525  | 0.527266  | -2.360140 |
| H                                                              | 0.000018  | -0.773755 | 1.915886  | C | 4.447237  | -0.306774 | -1.306512 |
| N                                                              | -0.000014 | 2.000731  | 0.047749  | C | -1.194752 | 3.962478  | -0.625549 |
| H                                                              | 0.000001  | 0.460589  | 2.120583  | C | 1.194635  | 3.962485  | -0.625687 |
| H                                                              | -2.149726 | 4.454808  | -0.776937 | H | -1.983062 | -0.296518 | 3.335776  |
| C                                                              | -0.000077 | 4.608191  | -0.916136 | H | -3.075709 | 1.082174  | 3.148599  |
|                                                                |           |           |           | H | -3.698007 | -0.444530 | 3.784119  |
|                                                                |           |           |           | H | -2.311570 | -2.406878 | 1.871299  |

H -4.026148 -2.450114 2.336722  
H -3.560117 -2.443759 0.626937  
H -2.793900 1.515703 -2.382811  
H -1.243675 0.675663 -2.223252  
H -2.476114 0.061029 -3.338540  
H -4.835284 0.684752 -1.038723  
H -4.786940 -0.523869 -2.326168  
H -4.912018 -1.041488 -0.642805  
H 3.560004 -2.443723 0.627168  
H 4.026228 -2.449861 2.336903  
H 2.311600 -2.406646 1.871663  
H 3.698102 -0.444120 3.784100  
H 3.075916 1.082554 3.148407  
H 1.983160 -0.296028 3.335783  
H 1.243737 0.675572 -2.223356  
H 2.794027 1.515473 -2.382997  
H 2.476119 0.060738 -3.338587  
H 4.911985 -1.041681 -0.642784  
H 4.786922 -0.524171 -2.326180  
H 4.835333 0.684535 -1.038819  
H -0.000104 5.612265 -1.328910  
C 0.000003 -1.715090 -0.426632  
C 0.000063 -2.935916 0.281079  
C -0.000066 -1.865264 -1.827438  
C 0.000043 -4.185108 -0.338990  
H 0.000128 -2.910471 1.369345  
C -0.000089 -3.105306 -2.469977  
H -0.000096 -0.985926 -2.464675  
C -0.000038 -4.281699 -1.727961  
H 0.000091 -5.087646 0.269142  
H -0.000147 -3.147729 -3.557696

H -0.000056 -5.251019 -2.219627  
**11<sup>Ph</sup>** (at ωB97XD/BS4)  
SCF energy in gas phase: -1858.96181576  
Thermal correction to Enthalpy in gas phase: 0.641482  
Thermal correction to Gibbs Free Energy in gas phase: 0.542175  
SCF energy in solvent: -3097.18133001  
Co -0.000021 0.032206 0.265487  
P -2.150771 0.170944 0.143959  
P 2.150746 0.170911 0.144015  
N 0.000006 2.019163 0.501465  
H -2.148017 4.614267 0.308264  
C 0.000068 4.809021 0.261083  
H 2.148142 4.614192 0.308524  
C -2.446037 1.940571 0.630592  
C -3.333836 -0.767318 1.233890  
C -2.910101 0.057238 -1.554028  
C 2.446021 1.940476 0.630868  
C 3.333788 -0.767500 1.233842  
C 2.910086 0.057406 -1.553994  
C -1.164020 2.718292 0.477611  
C 1.164058 2.718254 0.477755  
H -3.261280 2.425571 0.082573  
H -2.731723 1.951076 1.690299  
H -4.296035 -0.236201 1.230191  
C -2.788783 -0.795909 2.666422  
C -3.549533 -2.196849 0.719377  
H -2.720378 -0.982264 -1.852330  
C -2.133160 0.966303 -2.511640  
C -4.413050 0.337920 -1.629613

|   |           |           |           |                                                       |                |           |           |
|---|-----------|-----------|-----------|-------------------------------------------------------|----------------|-----------|-----------|
| H | 2.731528  | 1.950858  | 1.690624  | H                                                     | 4.999690       | -0.336533 | -0.998976 |
| H | 3.261372  | 2.425503  | 0.083034  | H                                                     | 4.766112       | 0.217382  | -2.660761 |
| H | 4.296010  | -0.236425 | 1.230160  | H                                                     | 4.644609       | 1.366611  | -1.327257 |
| C | 3.549419  | -2.196997 | 0.719198  | H                                                     | 0.000094       | 5.888550  | 0.146629  |
| C | 2.788793  | -0.796181 | 2.666393  | C                                                     | -0.000011      | -1.849603 | -0.131699 |
| H | 2.720287  | -0.982035 | -1.852456 | C                                                     | -0.000147      | -2.858548 | 0.854736  |
| C | 2.133211  | 0.966654  | -2.511491 | C                                                     | 0.000139       | -2.320280 | -1.461483 |
| C | 4.413065  | 0.337957  | -1.629551 | C                                                     | -0.000133      | -4.219730 | 0.548272  |
| C | -1.191482 | 4.103117  | 0.343910  | H                                                     | -0.000294      | -2.573130 | 1.907314  |
| C | 1.191585  | 4.103076  | 0.344056  | C                                                     | 0.000170       | -3.677200 | -1.786552 |
| H | -1.827268 | -1.317966 | 2.694980  | H                                                     | 0.000266       | -1.597537 | -2.279544 |
| H | -2.635164 | 0.207522  | 3.078800  | C                                                     | 0.000034       | -4.640853 | -0.780433 |
| H | -3.488200 | -1.323097 | 3.326268  | H                                                     | -0.000249      | -4.956260 | 1.349835  |
| H | -2.601049 | -2.739448 | 0.660557  | H                                                     | 0.000302       | -3.985081 | -2.830756 |
| H | -4.211502 | -2.739288 | 1.405049  | H                                                     | 0.000053       | -5.699473 | -1.026173 |
| H | -4.012036 | -2.219472 | -0.272207 | <b>TS<sub>2-12</sub><sup>Ph</sup></b> (at ωB97XD/BS4) |                |           |           |
| H | -2.253658 | 2.024703  | -2.246641 | SCF energy in gas phase:                              | -1860.09306108 |           |           |
| H | -1.064621 | 0.736495  | -2.485237 | Thermal correction to Enthalpy in gas                 |                |           |           |
| H | -2.493731 | 0.838638  | -3.539049 | phase:                                                | 0.653438       |           |           |
| H | -4.644484 | 1.366670  | -1.327555 | Thermal correction to Gibbs Free Energy               |                |           |           |
| H | -4.766133 | 0.217135  | -2.660785 | in gas phase:                                         | 0.558229       |           |           |
| H | -4.999726 | -0.336361 | -0.998862 | SCF energy in solvent:                                | -3098.32734131 |           |           |
| H | 4.011850  | -2.219559 | -0.272421 | Co                                                    | -0.020692      | 0.043977  | -0.041352 |
| H | 4.211426  | -2.739502 | 1.404782  | P                                                     | -2.212830      | -0.257388 | 0.016718  |
| H | 2.600920  | -2.739569 | 0.660405  | H                                                     | -0.296716      | -0.136101 | -1.790368 |
| H | 3.488203  | -1.323470 | 3.326166  | P                                                     | 2.159283       | -0.123147 | 0.169468  |
| H | 2.635256  | 0.207225  | 3.078865  | H                                                     | 0.055323       | 0.093569  | 1.434577  |
| H | 1.827249  | -1.318181 | 2.694944  | N                                                     | 0.045574       | -1.948808 | -0.108206 |
| H | 1.064633  | 0.737022  | -2.485023 | C                                                     | -2.073099      | -1.669783 | -1.109805 |
| H | 2.253902  | 2.025012  | -2.246425 | C                                                     | -3.041937      | -0.745382 | 1.604173  |
| H | 2.493683  | 0.839008  | -3.538937 | C                                                     | -3.352015      | 0.971084  | -0.775964 |

|   |           |           |           |   |           |           |           |
|---|-----------|-----------|-----------|---|-----------|-----------|-----------|
| C | 3.262454  | -0.247074 | -1.326213 | H | -5.001491 | -0.404070 | -1.175210 |
| C | 3.101279  | 0.961493  | 1.343303  | H | -3.050414 | 0.360999  | -2.848766 |
| C | 2.243242  | -1.837567 | 0.881695  | H | -1.903344 | 1.592413  | -2.281981 |
| C | -1.024015 | -2.558815 | -0.691761 | H | -3.580128 | 2.041201  | -2.636693 |
| C | 1.130638  | -2.653986 | 0.272013  | H | 4.186534  | 1.028782  | -2.810412 |
| H | -2.954596 | -2.125559 | -1.560186 | H | 4.153380  | 1.756166  | -1.199406 |
| H | -1.074702 | -0.736113 | -1.796157 | H | 2.672082  | 1.680643  | -2.160025 |
| H | -4.052677 | -1.089741 | 1.351258  | H | 1.660795  | -0.754344 | -2.709722 |
| C | -3.137497 | 0.465826  | 2.538907  | H | 2.461856  | -2.169408 | -2.016532 |
| C | -2.299263 | -1.897172 | 2.288395  | H | 3.287762  | -1.217468 | -3.260276 |
| H | -3.195703 | 1.893072  | -0.200992 | H | 5.060120  | 1.220367  | 2.229228  |
| C | -4.829696 | 0.569192  | -0.699894 | H | 5.129098  | 0.518466  | 0.610636  |
| C | -2.939039 | 1.253927  | -2.223909 | H | 4.615707  | -0.472582 | 1.988811  |
| H | 4.197119  | -0.715638 | -0.989198 | H | 2.310880  | 0.146690  | 3.215848  |
| C | 3.584868  | 1.136659  | -1.900615 | H | 1.371768  | 1.496063  | 2.549791  |
| C | 2.627897  | -1.152537 | -2.387276 | H | 2.939398  | 1.795624  | 3.328334  |
| H | 3.079803  | 1.945534  | 0.857297  | H | -1.830532 | -4.437441 | -1.391906 |
| C | 4.558030  | 0.528198  | 1.543828  | C | 0.124458  | -4.670628 | -0.527804 |
| C | 2.380620  | 1.104543  | 2.686759  | H | 2.090117  | -4.567940 | 0.396810  |
| H | 3.215590  | -2.321612 | 0.741324  | H | 0.161305  | -5.744238 | -0.689888 |
| H | 2.066813  | -1.739437 | 1.960179  | C | -0.065533 | 1.970102  | -0.115286 |
| C | -0.982444 | -3.953114 | -0.919947 | C | 0.246115  | 2.641680  | -1.311066 |
| C | 1.208044  | -4.020342 | 0.083965  | C | -0.404315 | 2.789244  | 0.974044  |
| H | -3.665170 | 0.190527  | 3.459544  | C | 0.235357  | 4.032273  | -1.413971 |
| H | -3.671132 | 1.308379  | 2.086346  | H | 0.488566  | 2.057065  | -2.196965 |
| H | -2.134167 | 0.809871  | 2.812586  | C | -0.421199 | 4.181673  | 0.885778  |
| H | -1.259793 | -1.619782 | 2.493560  | H | -0.670357 | 2.328531  | 1.922888  |
| H | -2.295986 | -2.803329 | 1.675824  | C | -0.096615 | 4.814772  | -0.310849 |
| H | -2.787009 | -2.135450 | 3.241247  | H | 0.483318  | 4.505354  | -2.361784 |
| H | -5.440357 | 1.308129  | -1.231361 | H | -0.690811 | 4.773983  | 1.757724  |
| H | -5.199872 | 0.516684  | 0.328490  | H | -0.107523 | 5.898855  | -0.384317 |

**12<sup>Ph</sup>** (at ωB97XD/BS4)

SCF energy in gas phase: -1858.93527062

Thermal correction to Enthalpy in gas phase: 0.637681

Thermal correction to Gibbs Free Energy in gas phase: 0.539953

SCF energy in solvent: -3097.16799293

Co -0.021550 -0.080352 0.086141

P -2.221778 -0.253803 0.241026

P 2.176404 -0.222486 0.011813

H 0.006458 -0.027434 1.512303

N -0.004422 -2.068425 0.084278

C -2.396755 -1.996816 0.306713

C -3.158871 0.535259 1.631160

C -3.062726 0.334794 -1.313946

C 2.918943 0.124634 -1.653032

C 3.263286 0.619984 1.248963

C 2.443441 -2.034123 0.235252

C -1.229852 -2.728236 0.142631

C 1.145838 -2.793623 0.051265

H -3.354511 -2.505273 0.356048

H -4.155387 0.071968 1.611588

C -3.306430 2.051176 1.462817

C -2.495446 0.185582 2.965942

H -2.869697 1.412177 -1.381678

C -4.572636 0.083240 -1.311863

C -2.403089 -0.364771 -2.507757

H 3.884250 -0.397784 -1.695688

C 3.148738 1.620347 -1.892416

C 1.989585 -0.473055 -2.717819

H 3.101942 1.688380 1.055786

C 4.748833 0.286149 1.075384

C 2.796360 0.325701 2.679002

H 3.225616 -2.418879 -0.428527

H 2.792932 -2.200900 1.261679

C -1.230646 -4.162070 0.023693

C 1.173217 -4.162904 -0.063471

H -3.850285 2.467243 2.319365

H -3.860837 2.318992 0.557720

H -2.327402 2.537782 1.412526

H -1.530457 0.696383 3.058001

H -2.320690 -0.891557 3.053783

H -3.131656 0.505650 3.799584

H -5.012515 0.401600 -2.264813

H -5.084022 0.628846 -0.512351

H -4.786120 -0.984949 -1.187144

H -2.589925 -1.443096 -2.469898

H -1.314739 -0.227441 -2.518460

H -2.799270 0.026017 -3.452254

H 3.533429 1.774668 -2.907275

H 3.878780 2.042867 -1.194686

H 2.217964 2.186797 -1.791674

H 1.034790 0.066075 -2.735977

H 1.776444 -1.533158 -2.541105

H 2.439851 -0.378442 -3.712302

H 5.343255 0.828463 1.819389

H 5.127479 0.559665 0.085869

H 4.933079 -0.784501 1.224850

H 2.953383 -0.725727 2.946369

H 1.734624 0.547935 2.813177

H 3.370663 0.933204 3.387206

H -2.187803 -4.673259 0.026982

|                                                               |           |           |           |   |           |           |           |
|---------------------------------------------------------------|-----------|-----------|-----------|---|-----------|-----------|-----------|
| C                                                             | -0.062410 | -4.851594 | -0.091497 | H | 0.442196  | 2.349684  | 2.096143  |
| H                                                             | 2.118205  | -4.693630 | -0.092353 | C | -0.255375 | 4.267875  | -1.168476 |
| H                                                             | -0.075797 | -5.934283 | -0.187471 | H | -0.441617 | 2.349808  | -2.096207 |
| C                                                             | -0.018992 | 1.837803  | -0.043554 | C | 0.000631  | 4.979843  | -0.000028 |
| C                                                             | -0.330282 | 2.442786  | -1.274292 | H | 0.456844  | 4.800033  | 2.096241  |
| C                                                             | 0.330745  | 2.712437  | 0.998976  | H | -0.455628 | 4.800156  | -2.096297 |
| C                                                             | -0.293345 | 3.825417  | -1.458937 | H | 0.000777  | 6.066657  | -0.000028 |
| H                                                             | -0.608459 | 1.826649  | -2.129236 | C | -2.364262 | -1.965064 | -0.637296 |
| C                                                             | 0.367548  | 4.095964  | 0.829863  | C | -3.147087 | -0.271040 | 1.629530  |
| H                                                             | 0.570554  | 2.305715  | 1.979198  | C | -3.336830 | 0.807656  | -1.106283 |
| C                                                             | 0.056371  | 4.663075  | -0.403809 | C | 3.147007  | -0.271844 | -1.629551 |
| H                                                             | -0.541246 | 4.247644  | -2.430131 | C | 3.336971  | 0.807053  | 1.106200  |
| H                                                             | 0.638570  | 4.734969  | 1.667315  | C | 2.363821  | -1.965534 | 0.637407  |
| H                                                             | 0.083407  | 5.740506  | -0.539660 | C | -1.139487 | -2.771296 | -0.271364 |
| <b>2<sup>Ir-Ph</sup> (at ωB97XD/BS4)</b>                      |           |           |           | C | 1.138887  | -2.771525 | 0.271481  |
| SCF energy in gas phase: -1819.87051288                       |           |           |           | H | -3.277399 | -2.487985 | -0.332621 |
| Thermal correction to Enthalpy in gas phase: 0.659429         |           |           |           | H | -2.382964 | -1.877978 | -1.730667 |
| Thermal correction to Gibbs Free Energy in gas phase: 0.56212 |           |           |           | H | -4.192708 | -0.537496 | 1.428792  |
| SCF energy in solvent: -1820.07002944                         |           |           |           | C | -3.079829 | 1.118311  | 2.273052  |
| Ir                                                            | 0.000011  | 0.064772  | -0.000016 | C | -2.543327 | -1.334462 | 2.550959  |
| P                                                             | -2.255074 | -0.218931 | 0.004777  | H | -3.049242 | 1.830048  | -0.827021 |
| H                                                             | -0.060591 | 0.088514  | -1.678670 | C | -4.842755 | 0.626438  | -0.892771 |
| P                                                             | 2.255028  | -0.219422 | -0.004793 | C | -2.971850 | 0.617846  | -2.582613 |
| H                                                             | 0.060638  | 0.088591  | 1.678637  | H | 4.192546  | -0.538630 | -1.428825 |
| N                                                             | -0.000231 | -2.100100 | 0.000048  | C | 3.080179  | 1.117518  | -2.273093 |
| C                                                             | 0.000258  | 2.117599  | -0.000030 | C | 2.542879  | -1.335077 | -2.550954 |
| C                                                             | 0.251628  | 2.873573  | 1.163094  | H | 3.049679  | 1.829474  | 0.826737  |
| C                                                             | -0.250920 | 2.873640  | -1.163154 | C | 4.842875  | 0.625417  | 0.892884  |
| C                                                             | 0.256449  | 4.267807  | 1.168419  | C | 2.971780  | 0.617614  | 2.582523  |
|                                                               |           |           |           | H | 3.276858  | -2.488675 | 0.332815  |
|                                                               |           |           |           | H | 2.382483  | -1.878374 | 1.730773  |

C -1.167674 -4.162565 -0.263366  
 C 1.166789 -4.162799 0.263513  
 H -3.582508 1.109543 3.247123  
 H -3.558342 1.886225 1.655112  
 H -2.035463 1.414113 2.419685  
 H -1.479883 -1.133579 2.716504  
 H -2.643640 -2.345118 2.138435  
 H -3.056597 -1.319321 3.519507  
 H -5.394102 1.232023 -1.621257  
 H -5.166690 0.938060 0.104341  
 H -5.144543 -0.418389 -1.039531  
 H -3.386666 -0.318916 -2.975772  
 H -1.888929 0.607386 -2.730636  
 H -3.398866 1.435126 -3.173953  
 H 3.582858 1.108582 -3.247164  
 H 3.558927 1.885292 -1.655161  
 H 2.035906 1.413642 -2.419730  
 H 1.479491 -1.133858 -2.716459  
 H 2.642887 -2.345764 -2.138434  
 H 3.056115 -1.320099 -3.519523  
 H 5.394291 1.230989 1.621327  
 H 5.167005 0.936784 -0.104243  
 H 5.144378 -0.419461 1.039861  
 H 3.386281 -0.319194 2.975902  
 H 1.888837 0.607511 2.730428  
 H 3.398970 1.434880 3.173759  
 H -2.096187 -4.680621 -0.478489  
 C -0.000515 -4.866632 0.000080  
 H 2.095194 -4.681043 0.478651  
 H -0.000626 -5.952170 0.000091

**TS<sub>9-10</sub><sup>Ir-Ph</sup> (at ωB97XD/BS4)**

SCF energy in gas phase: -1819.81040153  
 Thermal correction to Enthalpy in gas phase: 0.655409  
 Thermal correction to Gibbs Free Energy in gas phase: 0.558951  
 SCF energy in solvent: -1820.01108106  
 Ir -0.000051 -0.052345 -0.602468  
 P 2.222440 0.187283 -0.148883  
 P -2.222395 0.188021 -0.148680  
 H -0.000056 0.130841 -2.318530  
 N 0.000357 2.100546 -0.234910  
 H -0.000123 -0.937168 -2.052031  
 H 2.149550 4.580008 0.511656  
 C 0.001054 4.759722 0.594652  
 H -2.147545 4.580780 0.512761  
 C 2.439787 2.021406 -0.371828  
 C 3.533439 -0.564385 -1.234259  
 C 2.859273 -0.117672 1.580138  
 C -2.439229 2.022349 -0.370529  
 C -3.533689 -0.562633 -1.234409  
 C -2.859205 -0.117563 1.580230  
 C 1.169022 2.764486 -0.059094  
 C -1.167973 2.764892 -0.058474  
 H 3.283719 2.434201 0.190959  
 H 2.656083 2.171043 -1.437105  
 H 4.503376 -0.139727 -0.944375  
 C 3.288665 -0.267230 -2.715330  
 C 3.547469 -2.081035 -0.996808  
 H 2.560164 -1.151559 1.792880  
 C 2.111783 0.795849 2.556860  
 C 4.373160 0.022378 1.760642

|   |           |           |           |                                            |                |           |           |
|---|-----------|-----------|-----------|--------------------------------------------|----------------|-----------|-----------|
| H | -2.656591 | 2.172794  | -1.435471 | H                                          | -4.935633      | -0.725347 | 1.194718  |
| H | -3.282469 | 2.435058  | 0.193361  | H                                          | -4.634950      | -0.100676 | 2.818452  |
| H | -4.503482 | -0.137842 | -0.944230 | H                                          | -4.725661      | 1.015191  | 1.452886  |
| C | -3.548189 | -2.079411 | -0.997803 | H                                          | 0.001326       | 5.789184  | 0.938251  |
| C | -3.288864 | -0.264772 | -2.715328 | C                                          | -0.000350      | -1.955585 | 0.279088  |
| H | -2.560010 | -1.151497 | 1.792619  | C                                          | -0.000978      | -3.149931 | -0.468784 |
| C | -2.111684 | 0.795718  | 2.557164  | C                                          | 0.000093       | -2.132764 | 1.677548  |
| C | -4.373082 | 0.022417  | 1.760847  | C                                          | -0.001149      | -4.412744 | 0.120450  |
| C | 1.193934  | 4.088101  | 0.364263  | H                                          | -0.001306      | -3.087349 | -1.555493 |
| C | -1.192181 | 4.088529  | 0.364874  | C                                          | -0.000061      | -3.391109 | 2.281641  |
| H | 4.054663  | -0.764555 | -3.321841 | H                                          | 0.000539       | -1.258863 | 2.323443  |
| H | 2.306304  | -0.636789 | -3.025097 | C                                          | -0.000685      | -4.545679 | 1.506187  |
| H | 3.331779  | 0.802656  | -2.945258 | H                                          | -0.001637      | -5.298548 | -0.510987 |
| H | 2.573543  | -2.516483 | -1.243430 | H                                          | 0.000305       | -3.463856 | 3.367323  |
| H | 4.307730  | -2.553094 | -1.629845 | H                                          | -0.000807      | -5.527963 | 1.970765  |
| H | 3.767628  | -2.344035 | 0.042788  | <b>11</b> <sup>Ir-Ph</sup> (at ωB97XD/BS4) |                |           |           |
| H | 2.463770  | 1.832403  | 2.481707  | SCF energy in gas phase:                   | -1818.66342759 |           |           |
| H | 1.037283  | 0.788644  | 2.353018  | Thermal correction to Enthalpy in gas      |                |           |           |
| H | 2.273471  | 0.464864  | 3.588719  | phase:                                     | 0.641564       |           |           |
| H | 4.725687  | 1.015136  | 1.452579  | Thermal correction to Gibbs Free Energy    |                |           |           |
| H | 4.635094  | -0.100622 | 2.818241  | in gas phase:                              | 0.541491       |           |           |
| H | 4.935695  | -0.725431 | 1.194555  | SCF energy in solvent:                     | -1818.85787644 |           |           |
| H | -3.768395 | -2.342923 | 0.041653  | Ir                                         | 0.000000       | 0.022737  | -0.000116 |
| H | -4.308609 | -2.550882 | -1.631088 | P                                          | 2.243311       | -0.226265 | -0.059446 |
| H | -2.574405 | -2.515017 | -1.244693 | P                                          | -2.243317      | -0.226137 | 0.059571  |
| H | -4.055269 | -0.761201 | -3.322059 | N                                          | -0.000077      | -2.116402 | -0.000253 |
| H | -3.331217 | 0.805275  | -2.944646 | C                                          | 0.000060       | 2.062220  | -0.000091 |
| H | -2.306788 | -0.634844 | -3.025390 | C                                          | -0.314553      | 2.822444  | -1.147904 |
| H | -1.037220 | 0.788772  | 2.353101  | C                                          | 0.314797       | 2.822401  | 1.147717  |
| H | -2.463852 | 1.832243  | 2.482454  | C                                          | -0.311600      | 4.216662  | -1.155548 |
| H | -2.273122 | 0.464335  | 3.588934  | H                                          | -0.563008      | 2.304809  | -2.073352 |

|   |           |           |           |                                                          |           |           |                |
|---|-----------|-----------|-----------|----------------------------------------------------------|-----------|-----------|----------------|
| C | 0.311974  | 4.216619  | 1.155378  | C                                                        | -1.187461 | -4.201104 | -0.092256      |
| H | 0.563220  | 2.304735  | 2.073156  | H                                                        | 3.653465  | 1.665217  | -2.986780      |
| C | 0.000216  | 4.928747  | -0.000079 | H                                                        | 3.818302  | 2.064008  | -1.270851      |
| H | -0.557165 | 4.750573  | -2.071655 | H                                                        | 2.208300  | 1.969227  | -1.996347      |
| H | 0.557605  | 4.750496  | 2.071487  | H                                                        | 1.355609  | -0.358632 | -2.867525      |
| H | 0.000272  | 6.015487  | -0.000073 | H                                                        | 2.314134  | -1.813259 | -2.564502      |
| C | 2.454317  | -2.044636 | 0.283457  | H                                                        | 2.892146  | -0.614338 | -3.735224      |
| C | 3.125169  | 0.021763  | -1.673362 | H                                                        | 5.351308  | 0.842821  | 1.893659       |
| C | 3.306856  | 0.617174  | 1.208094  | H                                                        | 5.223168  | 0.655394  | 0.141103       |
| C | -3.124837 | 0.021389  | 1.673758  | H                                                        | 5.009051  | -0.748247 | 1.203282       |
| C | -3.307085 | 0.617740  | -1.207483 | H                                                        | 3.046847  | -0.691566 | 2.942287       |
| C | -2.454460 | -2.044383 | -0.283894 | H                                                        | 1.691452  | 0.415968  | 2.662524       |
| C | 1.163710  | -2.810742 | 0.104029  | H                                                        | 3.224508  | 1.019546  | 3.337901       |
| C | -1.163923 | -2.810634 | -0.104596 | H                                                        | -3.652996 | 1.664452  | 2.987731       |
| H | 3.247590  | -2.494503 | -0.324757 | H                                                        | -3.818308 | 2.063651  | 1.271944       |
| H | 2.766778  | -2.149710 | 1.329708  | H                                                        | -2.208116 | 1.968888  | 1.997008       |
| H | 4.139424  | -0.390292 | -1.580878 | H                                                        | -1.354972 | -0.359168 | 2.867409       |
| C | 3.206547  | 1.517501  | -1.996586 | H                                                        | -2.313457 | -1.813795 | 2.564257       |
| C | 2.378746  | -0.739025 | -2.774421 | H                                                        | -2.891285 | -0.615207 | 3.735411       |
| H | 3.124562  | 1.681257  | 1.007639  | H                                                        | -5.351682 | 0.843831  | -1.892452      |
| C | 4.804740  | 0.324804  | 1.096759  | H                                                        | -5.223094 | 0.656079  | -0.139965      |
| C | 2.781278  | 0.322341  | 2.618144  | H                                                        | -5.009497 | -0.747415 | -1.202447      |
| H | -4.139071 | -0.390742 | 1.581403  | H                                                        | -3.047784 | -0.690675 | -2.942019      |
| C | -3.206305 | 1.517037  | 1.997390  | H                                                        | -1.692115 | 0.416564  | -2.662400      |
| C | -2.378103 | -0.739617 | 2.774455  | H                                                        | -3.225249 | 1.020553  | -3.337229      |
| H | -3.124567 | 1.681751  | -1.006849 | H                                                        | 2.140100  | -4.714291 | 0.170746       |
| C | -4.804983 | 0.325584  | -1.095792 | C                                                        | -0.000197 | -4.912512 | -0.000394      |
| C | -2.781946 | 0.323119  | -2.617741 | H                                                        | -2.140478 | -4.714093 | -0.171484      |
| H | -3.247822 | -2.494369 | 0.324114  | H                                                        | -0.000243 | -5.997845 | -0.000440      |
| H | -2.766828 | -2.149105 | -1.330210 | <b>TS<sub>2-12</sub><sup>Ir-Ph</sup></b> (at ωB97XD/BS4) |           |           |                |
| C | 1.187127  | -4.201213 | 0.091548  | SCF energy in gas phase:                                 |           |           | -1819.80702749 |

Thermal correction to Enthalpy in gas phase: 0.653519

Thermal correction to Gibbs Free Energy in gas phase: 0.556316

SCF energy in solvent: -1820.00967112

Ir -0.019968 0.101763 0.033725  
P -2.275674 -0.443932 0.026653  
H -0.347802 -0.173194 -1.831550  
P 2.271308 -0.062227 0.128145  
H 0.062146 0.291780 1.610692  
N 0.159054 -2.032079 -0.039679  
C -2.002969 -1.892878 -1.026527  
C -3.067924 -0.911245 1.637735  
C -3.511608 0.641192 -0.827238  
C 3.279294 -0.146762 -1.431222  
C 3.267985 1.020824 1.258464  
C 2.408911 -1.783716 0.832898  
C -0.888024 -2.697294 -0.612089  
C 1.314122 -2.660965 0.272843  
H -2.849219 -2.430237 -1.453296  
H -1.033860 -0.848125 -1.775047  
H -4.035568 -1.371166 1.400646  
C -3.293946 0.341445 2.491505  
C -2.219006 -1.941291 2.388909  
H -3.509118 1.564180 -0.233506  
C -4.925544 0.048836 -0.835738  
C -3.056289 1.003690 -2.244164  
H 4.259054 -0.557626 -1.154103  
C 3.470285 1.254972 -2.021047  
C 2.636214 -1.092847 -2.450195  
H 3.275417 1.989730 0.743261

C 4.712038 0.543679 1.447120  
C 2.566034 1.232104 2.603309  
H 3.393127 -2.234662 0.669325  
H 2.263561 -1.676323 1.915603  
C -0.759614 -4.087414 -0.846599  
C 1.473876 -4.015373 0.058656  
H -3.743686 0.066305 3.452604  
H -3.959127 1.064077 2.007325  
H -2.339900 0.841862 2.691018  
H -1.222284 -1.541407 2.601817  
H -2.099716 -2.865605 1.816093  
H -2.701358 -2.192597 3.340903  
H -5.602247 0.715360 -1.382599  
H -5.333971 -0.078421 0.171509  
H -4.944782 -0.925343 -1.338462  
H -2.969515 0.111654 -2.874232  
H -2.094040 1.519461 -2.231274  
H -3.794676 1.671978 -2.701756  
H 3.970068 1.186054 -2.993882  
H 4.084429 1.894420 -1.378727  
H 2.506377 1.753566 -2.168181  
H 1.647576 -0.730739 -2.748040  
H 2.516459 -2.107717 -2.057115  
H 3.266562 -1.151353 -3.344937  
H 5.254007 1.245467 2.090923  
H 5.259768 0.475971 0.502066  
H 4.745825 -0.438801 1.932928  
H 2.413483 0.287959 3.139455  
H 1.593202 1.707549 2.464904  
H 3.182556 1.878080 3.238882  
H -1.588951 -4.624542 -1.293981

C 0.406703 -4.732038 -0.507719  
 H 2.405325 -4.505525 0.318650  
 H 0.507012 -5.799589 -0.682084  
 C -0.191274 2.143174 -0.078082  
 C -0.513250 2.964874 1.018949  
 C 0.006034 2.819725 -1.298715  
 C -0.624206 4.350774 0.912168  
 H -0.685850 2.506086 1.990343  
 C -0.101707 4.203905 -1.419259  
 H 0.242841 2.239070 -2.189430  
 C -0.417066 4.983826 -0.309983  
 H -0.875585 4.938842 1.792321  
 H 0.060031 4.674000 -2.386892  
 H -0.502354 6.063535 -0.397128

**12<sup>Ir-Ph</sup>** (at ωB97XD/BS4)

SCF energy in gas phase: -1818.64623068

Thermal correction to Enthalpy in gas phase: 0.637986

Thermal correction to Gibbs Free Energy in gas phase: 0.538577

SCF energy in solvent: -1818.85012033

Ir -0.010189 0.019218 0.109502  
 P -2.286580 -0.445414 0.171597  
 P 2.282423 -0.122443 -0.004185  
 H 0.029267 0.118927 1.645998  
 N 0.134622 -2.125460 0.136366  
 C -2.276431 -2.202471 0.160686  
 C -3.310855 0.182694 1.581874  
 C -3.155224 0.153629 -1.362534  
 C 2.972091 0.085752 -1.711833  
 C 3.387882 0.850442 1.115726

C 2.570199 -1.907058 0.392821  
 C -1.048719 -2.853637 0.099589  
 C 1.337245 -2.757769 0.150621  
 H -3.189389 -2.789625 0.152141  
 H -4.282194 -0.324492 1.500601  
 C -3.516975 1.698614 1.503117  
 C -2.668071 -0.224242 2.910348  
 H -3.060411 1.246666 -1.354337  
 C -4.634575 -0.235386 -1.404976  
 C -2.413559 -0.393437 -2.586417  
 H 3.981001 -0.347543 -1.720667  
 C 3.047729 1.567477 -2.094840  
 C 2.094970 -0.697658 -2.697208  
 H 3.195948 1.890980 0.823289  
 C 4.874886 0.532156 0.933111  
 C 2.958166 0.696239 2.578587  
 H 3.435013 -2.311187 -0.144200  
 H 2.809109 -1.958596 1.462667  
 C -0.940778 -4.282637 -0.008540  
 C 1.462174 -4.122053 0.031299  
 H -4.074793 2.046449 2.380676  
 H -4.081044 1.996340 0.613286  
 H -2.554778 2.221614 1.480076  
 H -1.738809 0.333381 3.072832  
 H -2.432832 -1.293159 2.929328  
 H -3.346261 -0.000286 3.741992  
 H -5.089786 0.099048 -2.344936  
 H -5.203954 0.212641 -0.584193  
 H -4.750935 -1.324216 -1.347864  
 H -2.439161 -1.488280 -2.595908  
 H -1.358738 -0.088992 -2.595993

H -2.870758 -0.023588 -3.511434  
H 3.368775 1.666583 -3.138015  
H 3.763019 2.117650 -1.474828  
H 2.070447 2.052352 -1.990686  
H 1.092198 -0.255556 -2.759861  
H 1.980075 -1.749314 -2.414128  
H 2.531374 -0.660250 -3.701503  
H 5.475982 1.146200 1.613164  
H 5.221545 0.731900 -0.085561  
H 5.086287 -0.518633 1.164990  
H 3.131433 -0.321009 2.948185  
H 1.898733 0.929453 2.712996  
H 3.541614 1.377022 3.207986  
H -1.857185 -4.861238 -0.060655  
C 0.278273 -4.890162 -0.056345  
H 2.440141 -4.589444 0.043606  
H 0.342822 -5.971187 -0.149138  
C -0.150777 2.054019 -0.031621  
C 0.137034 2.951038 1.014885  
C -0.515909 2.649829 -1.255520  
C 0.066264 4.333631 0.855863  
H 0.415011 2.557885 1.990869  
C -0.580610 4.031506 -1.430407  
H -0.756638 2.017853 -2.111305  
C -0.291082 4.886577 -0.371303  
H 0.292468 4.983932 1.697935  
H -0.864642 4.439434 -2.397808  
H -0.345449 5.963985 -0.498858

**2Ir\_Ph\_tBu** (at  $\omega$ B97XD/BS4)

SCF energy in gas phase: -1977.07438532

Thermal correction to Enthalpy in gas phase: 0.780013

Thermal correction to Gibbs Free Energy in gas phase: 0.678685

SCF energy in solvent: -1977.32486497

Ir 0.000003 -0.059584 -0.000035  
P -2.275601 0.255920 0.122027  
H 0.016972 -0.071589 1.676966  
P 2.275572 0.256135 -0.122078  
H -0.016949 -0.071498 -1.677037  
N -0.000100 2.105907 0.000107  
C 0.000132 -2.117327 0.000005  
C -0.312481 -2.878740 -1.145056  
C 0.312892 -2.878612 1.145110  
C -0.317309 -4.273025 -1.151709  
H -0.558262 -2.360216 -2.066553  
C 0.317922 -4.272895 1.151867  
H 0.558643 -2.359977 2.066558  
C 0.000351 -4.986552 0.000106  
H -0.569208 -4.803034 -2.067986  
H 0.569918 -4.802801 2.068176  
H 0.000434 -6.073208 0.000145  
C -2.272972 1.962614 0.876487  
C -3.191789 0.503965 -1.522402  
C -3.333314 -0.744904 1.329933  
C 3.191701 0.503863 1.522431  
C 3.333344 -0.744347 -1.330218  
C 2.272815 1.962971 -0.876222  
C -1.097041 2.777731 0.405240  
C 1.096785 2.777898 -0.404899  
H -3.208636 2.512726 0.732133

|   |           |           |           |                                                              |           |           |           |
|---|-----------|-----------|-----------|--------------------------------------------------------------|-----------|-----------|-----------|
| H | -2.151336 | 1.793375  | 1.953744  | H                                                            | 5.115049  | -0.652117 | -2.538565 |
| C | -2.953483 | -0.718693 | -2.422465 | H                                                            | 5.302150  | 0.217794  | -1.018454 |
| C | -2.554169 | 1.719210  | -2.221952 | H                                                            | 4.349102  | 0.922702  | -2.334855 |
| C | -4.595117 | -0.011256 | 1.816080  | H                                                            | 2.094265  | -0.157252 | -3.057039 |
| C | -2.474172 | -1.060280 | 2.566920  | H                                                            | 1.617270  | -1.680223 | -2.306641 |
| C | 2.953313  | -0.718966 | 2.422248  | H                                                            | 3.098162  | -1.600458 | -3.290618 |
| C | 2.554061  | 1.718979  | 2.222186  | H                                                            | -2.018803 | 4.685757  | 0.740289  |
| C | 4.595137  | -0.010534 | -1.816143 | C                                                            | -0.000229 | 4.872973  | 0.000329  |
| C | 2.474235  | -1.059387 | -2.567311 | H                                                            | 2.018370  | 4.686064  | -0.739637 |
| H | 3.208422  | 2.513144  | -0.731738 | H                                                            | -0.000280 | 5.958508  | 0.000416  |
| H | 2.151237  | 1.793906  | -1.953514 | C                                                            | 3.710537  | -2.081788 | -0.671254 |
| C | -1.124070 | 4.168720  | 0.410400  | H                                                            | 4.440456  | -1.957612 | 0.134568  |
| C | 1.123681  | 4.168891  | -0.409843 | H                                                            | 2.827452  | -2.594009 | -0.273863 |
| H | -3.495862 | -0.578886 | -3.366561 | H                                                            | 4.165364  | -2.734981 | -1.426264 |
| H | -3.294141 | -1.655136 | -1.974036 | C                                                            | 4.697589  | 0.766712  | 1.393606  |
| H | -1.888649 | -0.816105 | -2.643808 | H                                                            | 5.095121  | 1.034627  | 2.380765  |
| H | -1.466891 | 1.613508  | -2.283438 | H                                                            | 5.246687  | -0.115613 | 1.053951  |
| H | -2.796838 | 2.663189  | -1.721537 | H                                                            | 4.920332  | 1.599353  | 0.716703  |
| H | -2.948353 | 1.781797  | -3.243889 | C                                                            | -3.710493 | -2.082163 | 0.670589  |
| H | -5.115000 | -0.653048 | 2.538336  | H                                                            | -4.440354 | -1.957752 | -0.135251 |
| H | -5.302149 | 0.217268  | 1.018464  | H                                                            | -2.827395 | -2.594298 | 0.273119  |
| H | -4.349098 | 0.921847  | 2.335040  | H                                                            | -4.165385 | -2.735548 | 1.425394  |
| H | -2.094212 | -0.158282 | 3.056910  | C                                                            | -4.697666 | 0.766809  | -1.393444 |
| H | -1.617197 | -1.681018 | 2.306051  | H                                                            | -5.095270 | 1.034816  | -2.380549 |
| H | -3.098073 | -1.601577 | 3.290080  | H                                                            | -5.246741 | -0.115545 | -1.053826 |
| H | 3.495526  | -0.579295 | 3.366460  | H                                                            | -4.920354 | 1.599390  | -0.716450 |
| H | 3.294097  | -1.655313 | 1.973718  | <b>TS<sub>9-10</sub><sup>Ir-Ph-tBu</sup></b> (at ωB97XD/BS4) |           |           |           |
| H | 1.888446  | -0.816486 | 2.643393  | SCF energy in gas phase: -1976.99429973                      |           |           |           |
| H | 1.466775  | 1.613295  | 2.283558  | Thermal correction to Enthalpy in gas                        |           |           |           |
| H | 2.796798  | 2.663056  | 1.721990  | phase: 0.774901                                              |           |           |           |
| H | 2.948166  | 1.781339  | 3.244168  |                                                              |           |           |           |

Thermal correction to Gibbs Free Energy  
in gas phase: 0.666481

SCF energy in solvent: -1977.24658219

Ir 0.000028 -0.036850 -0.519416  
P 2.288322 0.227438 -0.117591  
P -2.288276 0.227444 -0.117614  
H -0.000012 0.360696 -2.164533  
N 0.000010 2.113574 -0.195742  
H -0.000018 -0.862267 -1.955467  
H 2.148810 4.643950 0.345413  
C -0.000060 4.819866 0.457979  
H -2.148907 4.643937 0.345008  
C 2.410311 2.051425 -0.472060  
C 3.531267 -0.487231 -1.369615  
C 3.052422 0.128384 1.638213  
C -2.410249 2.051367 -0.472394  
C -3.531258 -0.487442 -1.369483  
C -3.052371 0.128755 1.638201  
C 1.164685 2.795160 -0.098457  
C -1.164690 2.795149 -0.098658  
H 3.298520 2.532093 -0.053844  
H 2.491579 2.117766 -1.565460  
C 2.833434 -0.580805 -2.736694  
C 3.915682 -1.914375 -0.947759  
C 2.098287 0.953456 2.520872  
C 4.467728 0.708285 1.783112  
H -2.491311 2.117521 -1.565823  
H -3.298540 2.532085 -0.054403  
C -3.915830 -1.914437 -0.947267  
C -2.833413 -0.581430 -2.736527  
C -2.098530 0.954405 2.520637

C -4.467860 0.708261 1.782856  
C 1.192780 4.140583 0.248921  
C -1.192856 4.140576 0.248694  
H 3.569066 -0.904785 -3.484385  
H 2.013907 -1.301322 -2.713856  
H 2.414152 0.376237 -3.064426  
H 3.037966 -2.502946 -0.657028  
H 4.395236 -2.422360 -1.793943  
H 4.631005 -1.917282 -0.121051  
H 2.127327 2.021260 2.275726  
H 1.066361 0.609840 2.406840  
H 2.391922 0.849230 3.572621  
H 4.570648 1.719045 1.374650  
H 4.715524 0.765648 2.851164  
H 5.220693 0.067340 1.316534  
H -4.631118 -1.917063 -0.120526  
H -4.395488 -2.422563 -1.793307  
H -3.038171 -2.503046 -0.656439  
H -3.569048 -0.905612 -3.484128  
H -2.414125 0.375515 -3.064528  
H -2.013900 -1.301957 -2.713485  
H -1.066406 0.611449 2.406347  
H -2.128335 2.022195 2.275530  
H -2.391827 0.849971 3.572458  
H -5.220618 0.066920 1.316483  
H -4.715701 0.765942 2.850882  
H -4.571065 1.718842 1.374018  
H -0.000091 5.865426 0.748817  
C -0.000001 -2.025722 0.141295  
C -0.000202 -3.127908 -0.737432  
C 0.000143 -2.367532 1.507935

|                                                                |           |           |           |    |           |           |           |
|----------------------------------------------------------------|-----------|-----------|-----------|----|-----------|-----------|-----------|
| C                                                              | -0.000310 | -4.451227 | -0.296987 | Ir | 0.000013  | -0.064917 | -0.226526 |
| H                                                              | -0.000292 | -2.945987 | -1.810214 | P  | -2.252979 | 0.264312  | -0.043813 |
| C                                                              | 0.000041  | -3.685508 | 1.965530  | P  | 2.253062  | 0.263851  | -0.043833 |
| H                                                              | 0.000382  | -1.571898 | 2.248418  | N  | 0.000222  | 2.041281  | -0.668633 |
| C                                                              | -0.000200 | -4.743820 | 1.063330  | C  | -0.000286 | -2.099308 | 0.019982  |
| H                                                              | -0.000479 | -5.257318 | -1.027312 | C  | -0.000541 | -2.926406 | -1.128340 |
| H                                                              | 0.000159  | -3.879424 | 3.035968  | C  | -0.000330 | -2.807041 | 1.240413  |
| H                                                              | -0.000286 | -5.772826 | 1.411953  | C  | -0.000830 | -4.318502 | -1.070877 |
| C                                                              | 3.083272  | -1.314117 | 2.171568  | H  | -0.000515 | -2.464412 | -2.114069 |
| H                                                              | 3.210132  | -1.288299 | 3.261828  | C  | -0.000606 | -4.199672 | 1.314773  |
| H                                                              | 2.167776  | -1.861158 | 1.952093  | H  | -0.000180 | -2.258004 | 2.177055  |
| H                                                              | 3.920499  | -1.884761 | 1.764907  | C  | -0.000865 | -4.973024 | 0.157635  |
| C                                                              | 4.800697  | 0.361749  | -1.554467 | H  | -0.001033 | -4.893823 | -1.994526 |
| H                                                              | 5.357929  | 0.515003  | -0.629720 | H  | -0.000622 | -4.682868 | 2.289931  |
| H                                                              | 5.468746  | -0.150289 | -2.258799 | H  | -0.001082 | -6.058270 | 0.211780  |
| H                                                              | 4.576333  | 1.344593  | -1.982715 | C  | -2.441332 | 1.935409  | -0.842241 |
| C                                                              | -4.800595 | 0.361625  | -1.554583 | C  | -3.504421 | -0.787795 | -0.993097 |
| H                                                              | -5.468657 | -0.150500 | -2.258838 | C  | -2.843179 | 0.576039  | 1.732008  |
| H                                                              | -5.357860 | 0.515137  | -0.629898 | C  | 2.843348  | 0.575587  | 1.731956  |
| H                                                              | -4.576101 | 1.344350  | -1.983035 | C  | 3.504337  | -0.788500 | -0.993056 |
| C                                                              | -3.082770 | -1.313590 | 2.171984  | C  | 2.441725  | 1.934859  | -0.842359 |
| H                                                              | -2.166894 | -1.860222 | 1.953100  | C  | -1.166236 | 2.730662  | -0.763911 |
| H                                                              | -3.210169 | -1.287498 | 3.262174  | C  | 1.166820  | 2.730409  | -0.763978 |
| H                                                              | -3.919490 | -1.884801 | 1.765084  | H  | -2.637493 | 1.741804  | -1.904141 |
| <b>11</b> Ir-Ph-tBu (at ωB97XD/BS4)                            |           |           |           | H  | -3.290544 | 2.514285  | -0.464138 |
| SCF energy in gas phase: -1975.86673538                        |           |           |           | C  | -3.683041 | -2.127077 | -0.259773 |
| Thermal correction to Enthalpy in gas phase: 0.761425          |           |           |           | C  | -2.859451 | -1.075071 | -2.361546 |
| Thermal correction to Gibbs Free Energy in gas phase: 0.657345 |           |           |           | C  | -4.355826 | 0.761548  | 1.895536  |
| SCF energy in solvent: -1976.11210258                          |           |           |           | C  | -2.145586 | 1.857512  | 2.223237  |
|                                                                |           |           |           | C  | 2.357623  | -0.581807 | 2.617200  |
|                                                                |           |           |           | C  | 2.145984  | 1.857191  | 2.223174  |

|   |           |           |           |                                                                |           |           |           |
|---|-----------|-----------|-----------|----------------------------------------------------------------|-----------|-----------|-----------|
| C | 4.870636  | -0.130191 | -1.241920 | C                                                              | 0.000519  | 4.829117  | -0.859498 |
| C | 2.859155  | -1.076042 | -2.361346 | H                                                              | 2.148041  | 4.629056  | -0.892440 |
| H | 3.291103  | 2.513572  | -0.464367 | H                                                              | 0.000633  | 5.913371  | -0.908442 |
| H | 2.637761  | 1.741141  | -1.904264 | C                                                              | -2.357519 | -0.581485 | 2.617146  |
| C | -1.191230 | 4.118679  | -0.841493 | H                                                              | -2.699283 | -1.560026 | 2.269698  |
| C | 1.192112  | 4.118420  | -0.841580 | H                                                              | -1.265132 | -0.601855 | 2.633452  |
| H | -4.257094 | -2.813214 | -0.895380 | H                                                              | -2.721592 | -0.435300 | 3.642655  |
| H | -4.236089 | -2.011655 | 0.677984  | C                                                              | -4.870746 | -0.129418 | -1.241646 |
| H | -2.718110 | -2.597245 | -0.042953 | H                                                              | -5.465591 | -0.785323 | -1.890227 |
| H | -1.916330 | -1.610240 | -2.247001 | H                                                              | -5.444340 | 0.027740  | -0.327443 |
| H | -2.664719 | -0.161259 | -2.934501 | H                                                              | -4.777477 | 0.833387  | -1.756691 |
| H | -3.542484 | -1.696955 | -2.954491 | C                                                              | 4.356048  | 0.760894  | 1.895358  |
| H | -4.567684 | 1.073517  | 2.926402  | H                                                              | 4.568038  | 1.072907  | 2.926187  |
| H | -4.908032 | -0.165378 | 1.718338  | H                                                              | 4.908103  | -0.166123 | 1.718181  |
| H | -4.754074 | 1.536605  | 1.230921  | H                                                              | 4.754360  | 1.535845  | 1.230656  |
| H | -2.530397 | 2.759541  | 1.735277  | C                                                              | 3.683067  | -2.127666 | -0.259537 |
| H | -1.066032 | 1.804633  | 2.055112  | H                                                              | 4.236361  | -2.012140 | 0.678059  |
| H | -2.319396 | 1.967523  | 3.301004  | H                                                              | 2.718155  | -2.597736 | -0.042421 |
| H | 2.721646  | -0.435494 | 3.642710  | H                                                              | 4.256905  | -2.813935 | -0.895198 |
| H | 2.699420  | -1.560385 | 2.269901  | <b>TS<sub>2-12</sub><sup>Ir.Ph.tBu</sup> (at ωB97XD/BS4)</b>   |           |           |           |
| H | 1.265239  | -0.602168 | 2.633447  | SCF energy in gas phase: -1977.01048063                        |           |           |           |
| H | 1.066414  | 1.804461  | 2.055130  | Thermal correction to Enthalpy in gas phase: 0.773626          |           |           |           |
| H | 2.530914  | 2.759123  | 1.735143  | Thermal correction to Gibbs Free Energy in gas phase: 0.671301 |           |           |           |
| H | 2.319894  | 1.967213  | 3.300924  | SCF energy in solvent: -1977.26406849                          |           |           |           |
| H | 5.465471  | -0.786349 | -1.890254 | Ir                                                             | 0.009734  | 0.096869  | 0.031787  |
| H | 5.444261  | 0.027353  | -0.327804 | P                                                              | -2.323192 | -0.248394 | -0.085001 |
| H | 4.777322  | 0.832397  | -1.757356 | H                                                              | -0.222565 | -0.156245 | -1.845055 |
| H | 2.663877  | -0.162321 | -2.934260 | P                                                              | 2.283582  | -0.302630 | 0.178629  |
| H | 1.916294  | -1.611616 | -2.246538 | H                                                              | 0.065431  | 0.275619  | 1.602385  |
| H | 3.542295  | -1.697655 | -2.954461 |                                                                |           |           |           |
| H | -2.147047 | 4.629530  | -0.892289 |                                                                |           |           |           |

|   |           |           |           |   |           |           |           |
|---|-----------|-----------|-----------|---|-----------|-----------|-----------|
| N | -0.012143 | -2.044760 | -0.014651 | H | -4.864073 | -0.605343 | -1.677093 |
| C | -2.080011 | -1.711332 | -1.135372 | H | -2.710626 | 0.119401  | -3.029272 |
| C | -3.224957 | -0.806271 | 1.489859  | H | -1.757066 | 1.497290  | -2.432312 |
| C | -3.398287 | 0.929948  | -1.101759 | H | -3.379296 | 1.761346  | -3.086702 |
| C | 3.191590  | -0.561976 | -1.465823 | H | 3.505102  | 0.539190  | -3.298327 |
| C | 3.338539  | 0.693012  | 1.388146  | H | 3.245454  | 1.604172  | -1.905740 |
| C | 2.211602  | -2.003040 | 0.946538  | H | 1.880715  | 0.736282  | -2.614425 |
| C | -1.088978 | -2.616343 | -0.633076 | H | 1.487221  | -1.701830 | -2.259385 |
| C | 1.046839  | -2.780943 | 0.385116  | H | 2.807368  | -2.723320 | -1.653036 |
| H | -2.940096 | -2.173292 | -1.619625 | H | 2.991050  | -1.851937 | -3.179715 |
| H | -0.959239 | -0.765842 | -1.807800 | H | 5.112035  | 0.575757  | 2.607453  |
| C | -3.804360 | 0.391118  | 2.255338  | H | 5.288823  | -0.309936 | 1.095256  |
| C | -2.201008 | -1.500623 | 2.407860  | H | 4.313934  | -0.985010 | 2.411083  |
| C | -4.834559 | 0.414955  | -1.279081 | H | 2.049240  | 0.129946  | 3.089712  |
| C | -2.761535 | 1.073373  | -2.496254 | H | 1.651494  | 1.691313  | 2.354659  |
| C | 2.941527  | 0.660181  | -2.364507 | H | 3.103830  | 1.525578  | 3.360448  |
| C | 2.573539  | -1.786242 | -2.167466 | H | -1.955927 | -4.482262 | -1.293788 |
| C | 4.582924  | -0.060964 | 1.887642  | C | -0.039712 | -4.774290 | -0.367536 |
| C | 2.471977  | 1.023023  | 2.617303  | H | 1.920542  | -4.729462 | 0.572103  |
| H | 3.144578  | -2.566110 | 0.841611  | H | -0.050639 | -5.853419 | -0.492183 |
| H | 2.046069  | -1.831635 | 2.017346  | C | 0.047398  | 2.148722  | -0.036087 |
| C | -1.100936 | -4.020611 | -0.811635 | C | -0.206897 | 2.958019  | 1.090485  |
| C | 1.064203  | -4.153848 | 0.238957  | C | 0.312293  | 2.852422  | -1.226996 |
| H | -4.142662 | 0.056348  | 3.244198  | C | -0.189221 | 4.350355  | 1.038873  |
| H | -4.668021 | 0.830650  | 1.748531  | H | -0.449026 | 2.481070  | 2.038064  |
| H | -3.052187 | 1.173662  | 2.405578  | C | 0.331664  | 4.244998  | -1.293835 |
| H | -1.412212 | -0.815128 | 2.724771  | H | 0.499010  | 2.293768  | -2.140761 |
| H | -1.728581 | -2.359864 | 1.924248  | C | 0.084092  | 5.008661  | -0.157070 |
| H | -2.726153 | -1.865737 | 3.300087  | H | -0.397193 | 4.923850  | 1.939561  |
| H | -5.357870 | 1.063545  | -1.992876 | H | 0.538874  | 4.734016  | -2.243212 |
| H | -5.401978 | 0.441505  | -0.344462 | H | 0.097823  | 6.094052  | -0.203323 |

|                                                                |           |           |           |   |           |           |           |
|----------------------------------------------------------------|-----------|-----------|-----------|---|-----------|-----------|-----------|
| C                                                              | -3.425190 | 2.331932  | -0.467862 | C | 2.969205  | -0.540376 | -1.621785 |
| H                                                              | -3.905779 | 2.349186  | 0.512001  | C | 3.392249  | 0.847228  | 1.151716  |
| H                                                              | -2.419445 | 2.743421  | -0.364492 | C | 2.395940  | -1.912780 | 0.921078  |
| H                                                              | -3.999213 | 2.998091  | -1.124711 | C | -1.175370 | -2.819514 | 0.309172  |
| C                                                              | -4.327243 | -1.832965 | 1.181010  | C | 1.179214  | -2.768306 | 0.651757  |
| H                                                              | -4.789235 | -2.154714 | 2.123149  | H | -3.296732 | -2.708609 | 0.099304  |
| H                                                              | -5.120593 | -1.436166 | 0.545311  | C | -3.629249 | 1.858642  | 1.207542  |
| H                                                              | -3.909811 | -2.719659 | 0.693079  | C | -3.004908 | -0.091477 | 2.634589  |
| C                                                              | 4.699524  | -0.812277 | -1.332392 | C | -3.977557 | -0.883741 | -2.290608 |
| H                                                              | 5.102168  | -1.070084 | -2.319920 | C | -1.546846 | -0.418203 | -2.552447 |
| H                                                              | 5.241631  | 0.070403  | -0.983243 | C | 2.592357  | 0.639155  | -2.532144 |
| H                                                              | 4.922539  | -1.649385 | -0.661652 | C | 2.290405  | -1.803436 | -2.187455 |
| C                                                              | 3.736635  | 2.024990  | 0.730786  | C | 4.731198  | 0.191829  | 1.528257  |
| H                                                              | 4.196662  | 2.672152  | 1.487697  | C | 2.627853  | 1.151799  | 2.453648  |
| H                                                              | 4.467749  | 1.892473  | -0.072338 | H | 3.317338  | -2.443281 | 0.660201  |
| H                                                              | 2.861080  | 2.548167  | 0.330655  | H | 2.436245  | -1.717459 | 1.999796  |
| <b>12Ir-Ph-tBu (at ωB97XD/BS4)</b>                             |           |           |           | C | -1.109382 | -4.253975 | 0.385030  |
| SCF energy in gas phase: -1975.85108729                        |           |           |           | C | 1.267166  | -4.137638 | 0.741960  |
| Thermal correction to Enthalpy in gas phase: 0.757898          |           |           |           | H | -4.158069 | 2.220723  | 2.098869  |
| Thermal correction to Gibbs Free Energy in gas phase: 0.653418 |           |           |           | H | -4.180099 | 2.218878  | 0.336088  |
| SCF energy in solvent: -1976.10520172                          |           |           |           | H | -2.636025 | 2.314068  | 1.193295  |
| Ir                                                             | -0.043065 | 0.030210  | 0.136980  | H | -2.037161 | 0.382957  | 2.829054  |
| P                                                              | -2.346981 | -0.384829 | 0.012788  | H | -2.873661 | -1.175854 | 2.703079  |
| P                                                              | 2.270677  | -0.254001 | 0.113288  | H | -3.704170 | 0.227704  | 3.417698  |
| H                                                              | -0.011360 | 0.134314  | 1.674464  | H | -4.123792 | -0.705197 | -3.364252 |
| N                                                              | 0.018819  | -2.117640 | 0.382851  | H | -4.920507 | -0.649458 | -1.788117 |
| C                                                              | -2.375138 | -2.139480 | 0.159791  | H | -3.765795 | -1.947624 | -2.147907 |
| C                                                              | -3.558355 | 0.326128  | 1.260349  | H | -1.296730 | -1.471138 | -2.384320 |
| C                                                              | -2.821091 | -0.014860 | -1.782486 | H | -0.684643 | 0.208072  | -2.263669 |
|                                                                |           |           |           | H | -1.686107 | -0.265343 | -3.630468 |
|                                                                |           |           |           | H | 3.066382  | 0.502980  | -3.512229 |

H 2.901862 1.609305 -2.136753  
 H 1.511787 0.676223 -2.692274  
 H 1.198651 -1.743598 -2.138919  
 H 2.595756 -2.714658 -1.664820  
 H 2.574752 -1.910782 -3.241435  
 H 5.284386 0.877071 2.182457  
 H 5.365683 -0.017038 0.665932  
 H 4.588547 -0.741326 2.083526  
 H 2.335482 0.244634 2.994195  
 H 1.730479 1.738716 2.254296  
 H 3.279614 1.735102 3.115779  
 H -2.033432 -4.813306 0.281782  
 C 0.079463 -4.888457 0.585427  
 H 2.216644 -4.615993 0.953284  
 H 0.114735 -5.973423 0.639964  
 C -0.068869 2.083686 0.016839  
 C -0.213937 2.895540 1.161498  
 C 0.103743 2.792753 -1.188529  
 C -0.162224 4.286948 1.116711  
 H -0.382082 2.424006 2.128141  
 C 0.153035 4.185107 -1.250830  
 H 0.201706 2.249297 -2.125851  
 C 0.028117 4.947143 -0.093725  
 H -0.276633 4.857407 2.035545  
 H 0.290557 4.673850 -2.212690  
 H 0.070444 6.031734 -0.135281  
 C -3.126865 1.464674 -2.039608  
 H -4.124935 1.731285 -1.679408  
 H -2.396594 2.128934 -1.568589  
 H -3.112016 1.657294 -3.120602  
 C -4.963000 -0.265649 1.080858

H -5.607148 0.070955 1.903390  
 H -5.426516 0.067605 0.146916  
 H -4.950680 -1.360446 1.094283  
 C 4.487945 -0.752175 -1.658641  
 H 4.778826 -1.060611 -2.670626  
 H 5.038203 0.164161 -1.427732  
 H 4.814690 -1.539204 -0.970624  
 C 3.633562 2.176384 0.418786  
 H 4.132565 2.875122 1.101438  
 H 4.283593 2.053456 -0.453438  
 H 2.692821 2.636562 0.098167

**TS<sub>11-13</sub>**

SCF energy in gas phase: -3508.83879528

Thermal correction to Enthalpy in gas phase: 0.836931

Thermal correction to Gibbs Free Energy in gas phase: 0.72217

SCF energy in solvent: -3509.08636608

Co 0.363801 0.141543 0.395876  
 P 0.019925 2.259072 0.182206  
 P 1.001004 -1.377276 -1.082900  
 B -1.551921 -0.137412 0.156834  
 C 0.626675 -1.071750 1.965001  
 H 0.083815 0.429306 1.811330  
 N 2.353640 0.708190 0.274103  
 O -2.506172 -0.184136 1.174060  
 O -2.224818 -0.294920 -1.065719  
 C -3.753959 -0.647421 0.657630  
 C -3.640757 -0.285311 -0.857594  
 C -4.882678 0.045420 1.401696  
 C -3.824464 -2.153233 0.904714

|   |           |           |           |   |           |           |           |
|---|-----------|-----------|-----------|---|-----------|-----------|-----------|
| C | -4.154758 | 1.115488  | -1.176742 | C | 2.706316  | 1.971802  | 0.561586  |
| C | -4.291504 | -1.280030 | -1.805496 | H | 0.154681  | 4.301676  | -1.136899 |
| H | -5.851951 | -0.218818 | 0.972725  | C | -1.317168 | 3.073861  | -2.129116 |
| H | -4.875287 | -0.267544 | 2.446365  | C | 1.186173  | 2.820601  | -2.292328 |
| H | -4.770931 | 1.128111  | 1.373977  | H | 1.814723  | 3.926159  | 0.766654  |
| H | -3.696252 | -2.340149 | 1.971388  | H | 1.427387  | 2.770380  | 2.065570  |
| H | -4.784242 | -2.568395 | 0.592985  | H | -2.236462 | 2.808655  | 0.657692  |
| H | -3.029240 | -2.677505 | 0.372101  | C | -1.398268 | 2.572870  | 2.603934  |
| H | -3.883470 | 1.369983  | -2.201462 | C | -1.225445 | 4.637561  | 1.169374  |
| H | -5.240088 | 1.174234  | -1.082320 | H | 1.930450  | -0.143975 | -2.821741 |
| H | -3.709415 | 1.858539  | -0.515929 | C | -0.046683 | -0.515959 | -3.550453 |
| H | -5.368391 | -1.330868 | -1.629694 | C | 1.932455  | -2.072755 | -3.747102 |
| H | -4.129891 | -0.959845 | -2.835875 | H | 0.073834  | -3.124382 | 0.142777  |
| H | -3.876400 | -2.279480 | -1.693353 | C | -0.902316 | -3.328999 | -1.751396 |
| C | -0.272670 | -2.080403 | 2.344162  | C | 1.368367  | -4.249354 | -1.126751 |
| C | 1.824185  | -1.042642 | 2.702388  | H | 2.698596  | -2.101230 | 0.435027  |
| C | 0.026030  | -3.026794 | 3.313724  | H | 3.424969  | -2.066108 | -1.191703 |
| H | -1.241358 | -2.127405 | 1.868975  | C | 4.599922  | 0.214956  | -0.362092 |
| C | 2.132726  | -1.981584 | 3.675389  | C | 4.023956  | 2.405651  | 0.427867  |
| H | 2.547977  | -0.257734 | 2.515238  | H | -2.153859 | 3.518570  | -1.569921 |
| C | 1.238790  | -2.995267 | 3.984030  | H | -1.279924 | 3.562867  | -3.115287 |
| H | -0.703064 | -3.794762 | 3.548458  | H | -1.550699 | 2.009097  | -2.280822 |
| H | 3.078237  | -1.912448 | 4.202113  | H | 2.163142  | 3.027582  | -1.830502 |
| H | 1.474226  | -3.731413 | 4.742503  | H | 1.139797  | 1.745263  | -2.511665 |
| C | 0.017161  | 3.239620  | -1.398716 | H | 1.148917  | 3.365860  | -3.248647 |
| C | 1.580870  | 2.873062  | 0.979947  | H | -0.478638 | 2.776526  | 3.176020  |
| C | -1.306816 | 3.107200  | 1.170897  | H | -2.225302 | 3.076842  | 3.128768  |
| C | 1.244194  | -1.008726 | -2.888989 | H | -1.587697 | 1.493360  | 2.622820  |
| C | 0.365779  | -3.109986 | -0.919491 | H | -1.314675 | 5.071590  | 0.163850  |
| C | 2.753180  | -1.531800 | -0.507067 | H | -2.042218 | 5.055440  | 1.778447  |
| C | 3.269256  | -0.160820 | -0.188949 | H | -0.279370 | 4.991672  | 1.610179  |

|                                                       |                |           |           |   |           |           |           |
|-------------------------------------------------------|----------------|-----------|-----------|---|-----------|-----------|-----------|
| H                                                     | -0.588900      | 0.181698  | -2.899399 | O | 2.170840  | -0.320195 | 1.070925  |
| H                                                     | 0.180700       | -0.014417 | -4.504996 | C | 3.799078  | -0.611919 | -0.573001 |
| H                                                     | -0.729619      | -1.350708 | -3.765500 | C | 3.595830  | -0.276778 | 0.940180  |
| H                                                     | 1.276878       | -2.941110 | -3.910868 | C | 4.939520  | 0.130884  | -1.248076 |
| H                                                     | 2.174061       | -1.656740 | -4.738632 | C | 3.936495  | -2.109818 | -0.835441 |
| H                                                     | 2.871800       | -2.436607 | -3.304964 | C | 4.057004  | 1.129599  | 1.311456  |
| H                                                     | -1.590660      | -2.477001 | -1.669950 | C | 4.217134  | -1.271904 | 1.907303  |
| H                                                     | -0.665644      | -3.474239 | -2.817161 | H | 5.894073  | -0.104249 | -0.771905 |
| H                                                     | -1.424552      | -4.236413 | -1.407727 | H | 4.997724  | -0.168287 | -2.295150 |
| H                                                     | 1.747280       | -4.294551 | -2.157882 | H | 4.786969  | 1.208507  | -1.213999 |
| H                                                     | 2.229308       | -4.178369 | -0.447438 | H | 3.842168  | -2.288105 | -1.906855 |
| H                                                     | 0.872446       | -5.210994 | -0.917043 | H | 4.903773  | -2.488546 | -0.501039 |
| C                                                     | 4.982741       | 1.512138  | -0.038015 | H | 3.151076  | -2.673870 | -0.330131 |
| H                                                     | 5.320083       | -0.506646 | -0.747762 | H | 3.723378  | 1.357679  | 2.324080  |
| H                                                     | 4.283038       | 3.436264  | 0.670568  | H | 5.144064  | 1.216146  | 1.278338  |
| H                                                     | 6.019609       | 1.829376  | -0.161529 | H | 3.630717  | 1.874836  | 0.640952  |
| <b>13</b>                                             |                |           |           | H | 5.302837  | -1.295367 | 1.790247  |
| SCF energy in gas phase:                              | -3508.8418747  |           |           | H | 3.992172  | -0.972113 | 2.931991  |
| Thermal correction to Enthalpy in gas phase:          | 0.839219       |           |           | H | 3.832314  | -2.278492 | 1.758036  |
| Thermal correction to Gibbs Free Energy in gas phase: | 0.724446       |           |           | C | 0.384322  | -2.335800 | -2.098225 |
| SCF energy in solvent:                                | -3509.09058983 |           |           | C | -1.646744 | -1.297566 | -2.697126 |
| Co                                                    | -0.336796      | 0.113861  | -0.471111 | C | 0.190625  | -3.301533 | -3.077345 |
| P                                                     | -0.028591      | 2.256183  | -0.241550 | H | 1.295160  | -2.392500 | -1.517808 |
| P                                                     | -1.063295      | -1.321154 | 1.104368  | C | -1.857278 | -2.253757 | -3.681649 |
| B                                                     | 1.565621       | -0.157761 | -0.185102 | H | -2.387310 | -0.510307 | -2.604028 |
| C                                                     | -0.530221      | -1.305154 | -1.844045 | C | -0.940433 | -3.274944 | -3.876840 |
| H                                                     | 0.024324       | 0.687614  | -1.762132 | H | 0.935840  | -4.077491 | -3.216703 |
| N                                                     | -2.351023      | 0.680741  | -0.442732 | H | -2.742289 | -2.192789 | -4.306050 |
| O                                                     | 2.565085       | -0.182382 | -1.150674 | H | -1.097595 | -4.023841 | -4.643385 |
|                                                       |                |           |           | C | -0.123092 | 3.299851  | 1.298329  |
|                                                       |                |           |           | C | -1.539422 | 2.830078  | -1.156069 |

|   |           |           |           |                                         |           |           |                       |
|---|-----------|-----------|-----------|-----------------------------------------|-----------|-----------|-----------------------|
| C | 1.357538  | 3.090306  | -1.167259 | H                                       | 2.392630  | 3.083348  | -3.062581             |
| C | -1.390691 | -0.806728 | 2.858900  | H                                       | 1.735496  | 1.489558  | -2.617244             |
| C | -0.434575 | -3.062696 | 1.122770  | H                                       | 1.332768  | 5.064975  | -0.171229             |
| C | -2.782675 | -1.513239 | 0.449966  | H                                       | 2.117398  | 5.032546  | -1.756945             |
| C | -3.284393 | -0.166335 | 0.022153  | H                                       | 0.349975  | 4.975824  | -1.653188             |
| C | -2.686067 | 1.934538  | -0.784793 | H                                       | 0.481494  | 0.321046  | 2.849835              |
| H | -0.242763 | 4.349356  | 0.984453  | H                                       | -0.381642 | 0.327967  | 4.419190              |
| C | 1.167442  | 3.167091  | 2.110709  | H                                       | 0.515566  | -1.110049 | 3.884485              |
| C | -1.344998 | 2.925641  | 2.138005  | H                                       | -1.506408 | -2.649800 | 4.029726              |
| H | -1.790785 | 3.886093  | -0.982466 | H                                       | -2.415623 | -1.288299 | 4.707479              |
| H | -1.314434 | 2.701776  | -2.225702 | H                                       | -3.062235 | -2.171604 | 3.310445              |
| H | 2.256336  | 2.794036  | -0.601139 | H                                       | 1.496997  | -2.384513 | 1.896510              |
| C | 1.538392  | 2.566941  | -2.596389 | H                                       | 0.507687  | -3.261719 | 3.090876              |
| C | 1.277798  | 4.622099  | -1.174874 | H                                       | 1.313517  | -4.158101 | 1.791081              |
| H | -2.059251 | 0.057220  | 2.690601  | H                                       | -1.889844 | -4.124935 | 2.391252              |
| C | -0.121726 | -0.283009 | 3.539759  | H                                       | -2.286091 | -4.153818 | 0.655068              |
| C | -2.137153 | -1.787983 | 3.765542  | H                                       | -0.965294 | -5.150177 | 1.278808              |
| H | -0.096261 | -3.176009 | 0.082405  | C                                       | -4.989218 | 1.494333  | -0.281758             |
| C | 0.792227  | -3.216692 | 2.027792  | H                                       | -5.358980 | -0.490622 | 0.503092              |
| C | -1.460586 | -4.171017 | 1.380301  | H                                       | -4.254319 | 3.393837  | -1.020475             |
| H | -2.684512 | -2.147217 | -0.445282 | H                                       | -6.030910 | 1.814171  | -0.221909             |
| H | -3.483706 | -1.999593 | 1.140838  | <b>TS<sub>11-15</sub></b>               |           |           |                       |
| C | -4.622127 | 0.213610  | 0.116863  | SCF energy in gas phase:                |           |           | -3508.81309779        |
| C | -4.008365 | 2.371894  | -0.731746 | Thermal correction to Enthalpy in gas   |           |           | phase: 0.837259       |
| H | 2.032266  | 3.603982  | 1.589527  | Thermal correction to Gibbs Free Energy |           |           | in gas phase: 0.72242 |
| H | 1.069184  | 3.681007  | 3.079867  | SCF energy in solvent:                  |           |           | -3509.06062831        |
| H | 1.402613  | 2.109975  | 2.306110  | Co                                      | 0.372669  | -0.239361 | -0.207849             |
| H | -2.290772 | 3.091072  | 1.600609  | P                                       | -0.645513 | -2.121939 | -0.048869             |
| H | -1.306850 | 1.869444  | 2.433054  | P                                       | 1.215080  | 1.740219  | 0.281782              |
| H | -1.375098 | 3.531987  | 3.057188  |                                         |           |           |                       |
| H | 0.654041  | 2.772986  | -3.220811 |                                         |           |           |                       |

|   |           |           |           |   |           |           |           |
|---|-----------|-----------|-----------|---|-----------|-----------|-----------|
| B | -1.411995 | 0.610170  | -0.307569 | H | 4.197069  | -3.147452 | -2.201645 |
| N | 0.935780  | -0.695384 | 1.726480  | H | 3.875779  | 0.727255  | -3.977282 |
| H | 0.477810  | -0.408733 | -1.676377 | H | 5.098093  | -1.424206 | -3.742603 |
| C | 1.851367  | -0.722314 | -1.622458 | H | 2.008809  | -1.556335 | 5.344331  |
| O | -2.304757 | 0.482626  | -1.381000 | C | -2.304031 | -2.274389 | 0.775920  |
| O | -2.014409 | 1.475110  | 0.628514  | C | 0.456689  | -2.999535 | 1.154777  |
| C | -3.344688 | 1.455492  | -1.294694 | C | -0.710399 | -3.177081 | -1.566376 |
| C | -3.339801 | 1.831363  | 0.225607  | C | 0.429771  | 3.352443  | -0.192203 |
| C | -2.955242 | 2.617093  | -2.207771 | C | 3.055188  | 1.978108  | 0.091928  |
| C | -4.641080 | 0.838160  | -1.795036 | C | 1.004473  | 1.688009  | 2.106970  |
| C | -3.560972 | 3.307867  | 0.518869  | C | 1.212928  | 0.286439  | 2.603946  |
| C | -4.318472 | 1.006880  | 1.056807  | C | 0.948954  | -1.976148 | 2.145317  |
| H | -2.809858 | 2.232111  | -3.217365 | H | -2.959911 | -1.682145 | 0.115862  |
| H | -3.727068 | 3.388195  | -2.237064 | H | -0.021102 | -3.843846 | 1.672239  |
| H | -2.017786 | 3.073035  | -1.890073 | H | 1.309675  | -3.408711 | 0.596647  |
| H | -5.475712 | 1.533238  | -1.678440 | H | 0.186161  | -2.833060 | -2.104884 |
| H | -4.543242 | 0.598900  | -2.854632 | H | -0.630452 | 3.069779  | -0.153968 |
| H | -4.877365 | -0.081993 | -1.263162 | H | 3.217432  | 1.929371  | -0.994761 |
| H | -4.538901 | 3.634211  | 0.158111  | H | 1.626173  | 2.407725  | 2.656866  |
| H | -3.523962 | 3.474053  | 1.596542  | H | -0.055241 | 1.945127  | 2.273528  |
| H | -2.797378 | 3.930672  | 0.055330  | C | 1.606749  | 0.009907  | 3.911975  |
| H | -4.108765 | 1.172153  | 2.114226  | C | 1.342429  | -2.320295 | 3.435442  |
| H | -5.352731 | 1.293138  | 0.858620  | C | 1.694187  | -1.312925 | 4.328299  |
| H | -4.210817 | -0.057714 | 0.856961  | H | 1.831592  | 0.831676  | 4.592234  |
| C | 2.540768  | -1.945894 | -1.573313 | H | 1.359187  | -3.368970 | 3.733372  |
| C | 2.374427  | 0.199397  | -2.547130 | C | -2.274298 | -1.598864 | 2.153542  |
| C | 3.692509  | -2.193523 | -2.308017 | H | -3.295541 | -1.536262 | 2.560434  |
| H | 2.200825  | -2.735495 | -0.919120 | H | -1.674885 | -2.182073 | 2.870682  |
| C | 3.519773  | -0.031585 | -3.289546 | H | -1.866428 | -0.580625 | 2.102630  |
| H | 1.848591  | 1.136899  | -2.692041 | C | -2.886370 | -3.684813 | 0.897335  |
| C | 4.200963  | -1.233589 | -3.167119 | H | -3.832779 | -3.647155 | 1.460210  |

H -3.103711 -4.138121 -0.078120  
H -2.212733 -4.363499 1.445168  
C -0.577017 -4.692306 -1.393806  
H -1.429509 -5.140465 -0.865285  
H -0.517369 -5.168742 -2.385593  
H 0.338765 -4.966652 -0.848821  
C -1.917450 -2.778537 -2.425274  
H -1.819407 -3.215643 -3.431036  
H -2.864848 -3.144524 -1.998857  
H -1.992373 -1.685577 -2.525325  
C 0.762284 3.698331 -1.645960  
H 0.179552 4.574889 -1.971106  
H 1.827843 3.940996 -1.784915  
H 0.510856 2.863874 -2.318449  
C 0.577590 4.555285 0.744953  
H 1.588075 4.983582 0.749572  
H -0.112100 5.351351 0.418556  
H 0.309376 4.304730 1.781704  
C 3.810388 0.794501 0.710490  
H 3.775163 0.828135 1.811881  
H 3.402423 -0.168908 0.378654  
H 4.869702 0.835685 0.413601  
C 3.640725 3.298413 0.598641  
H 4.739867 3.262015 0.530291  
H 3.307953 4.161030 0.006504  
H 3.388435 3.491226 1.654088

**TS<sub>11-15\_iso</sub>**

SCF energy in gas phase: -3508.81148977  
Thermal correction to Enthalpy in gas  
phase: 0.837446

Thermal correction to Gibbs Free Energy  
in gas phase: 0.723291

SCF energy in solvent: -3509.05900165

Co 0.041672 -0.478400 0.480894  
P 2.253546 -0.322757 0.533484  
P -1.964630 -1.019387 -0.140285  
B -0.157099 1.158083 -0.671794  
C -0.443496 0.190230 2.345403  
N 0.527157 -2.029330 -0.875597  
H 0.183180 -0.888373 1.992947  
O 0.014058 2.471052 -0.227642  
O -0.474379 1.220639 -2.043058  
C -0.422742 3.407674 -1.213974  
C -0.386038 2.561694 -2.532180  
C 0.507738 4.610473 -1.204452  
C -1.826227 3.862032 -0.820118  
C 0.926976 2.684962 -3.300005  
C -1.545785 2.813331 -3.483673  
H 0.230183 5.321619 -1.985875  
H 0.432754 5.117157 -0.241479  
H 1.545689 4.319501 -1.353247  
H -1.790544 4.259976 0.194298  
H -2.202754 4.638570 -1.488356  
H -2.528672 3.030449 -0.822197  
H 0.946954 1.927489 -4.084633  
H 1.033265 3.667225 -3.763600  
H 1.781173 2.517521 -2.646622  
H -1.555509 3.852401 -3.820223  
H -1.442421 2.173640 -4.361535  
H -2.503969 2.593124 -3.015577  
C 0.165755 1.404032 2.725469

|   |           |           |           |   |           |           |           |
|---|-----------|-----------|-----------|---|-----------|-----------|-----------|
| C | -1.531828 | -0.205889 | 3.144414  | C | -3.690084 | -3.353170 | -0.179040 |
| H | -1.817829 | 2.401260  | 5.293319  | H | -2.461380 | -2.239839 | -2.271958 |
| C | -1.435065 | 1.785750  | 4.489275  | H | -1.507208 | -0.737480 | -2.444915 |
| C | -0.325854 | 2.185727  | 3.752541  | C | -0.043896 | -3.373278 | -2.771621 |
| H | 0.995661  | 1.782670  | 2.147352  | C | 2.125239  | -3.568719 | -1.778222 |
| C | -2.027094 | 0.574320  | 4.177192  | H | 3.644014  | 2.609330  | -1.379302 |
| H | -2.007893 | -1.158249 | 2.955821  | H | 2.472241  | 2.492798  | -0.043537 |
| H | 0.156068  | 3.131810  | 3.972080  | H | 4.196790  | 2.111300  | 0.225931  |
| H | -2.881024 | 0.223761  | 4.745858  | H | 4.640033  | 0.531125  | -2.381992 |
| H | 1.475881  | -4.738474 | -3.475724 | H | 5.146082  | -0.235208 | -0.864956 |
| C | 3.088261  | 0.567730  | -0.875474 | H | 4.034160  | -1.079820 | -1.967665 |
| C | 2.652803  | -2.097872 | 0.226756  | H | 3.376381  | -0.418971 | 4.152959  |
| C | 3.284368  | 0.039934  | 2.040937  | H | 1.734070  | -0.541879 | 3.493012  |
| C | -3.289260 | 0.244232  | -0.405358 | H | 2.935371  | -1.814883 | 3.155224  |
| C | -2.795300 | -2.474426 | 0.705037  | H | 5.235615  | 0.462636  | 1.100747  |
| C | -1.649681 | -1.644610 | -1.836053 | H | 5.305146  | 0.046446  | 2.820546  |
| C | -0.351096 | -2.393863 | -1.829189 | H | 5.026058  | -1.226135 | 1.619879  |
| C | 1.747019  | -2.595636 | -0.856492 | H | -3.944085 | 0.499289  | 1.669222  |
| H | 2.275874  | 0.575757  | -1.620437 | H | -2.568773 | 1.527865  | 1.215901  |
| C | 3.363848  | 2.025154  | -0.487619 | H | -4.210108 | 1.912595  | 0.627091  |
| C | 4.294036  | -0.097721 | -1.545506 | H | -5.195261 | -0.822749 | -0.252235 |
| H | 3.707907  | -2.302001 | 0.002870  | H | -5.239872 | 0.640602  | -1.248084 |
| H | 2.390110  | -2.616131 | 1.163228  | H | -4.498404 | -0.835464 | -1.896415 |
| H | 3.113854  | 1.112405  | 2.229498  | H | -1.132113 | -3.883971 | 0.642560  |
| C | 2.791070  | -0.729059 | 3.273231  | H | -1.080040 | -2.815172 | 2.048045  |
| C | 4.792699  | -0.179504 | 1.872047  | H | -2.267683 | -4.150602 | 1.985460  |
| H | -2.806711 | 0.883265  | -1.162970 | H | -4.231881 | -4.079918 | 0.447323  |
| C | -3.508634 | 1.092354  | 0.850219  | H | -4.435533 | -2.791256 | -0.753477 |
| C | -4.622202 | -0.232839 | -0.984096 | H | -3.082305 | -3.935997 | -0.889827 |
| H | -3.425135 | -2.008007 | 1.483035  | C | 1.210656  | -3.972166 | -2.745619 |
| C | -1.759016 | -3.374439 | 1.391847  | H | -0.784320 | -3.646058 | -3.524033 |

H 3.122989 -4.005260 -1.725782

**TS<sub>13-14</sub>**

SCF energy in gas phase: -3508.8335483

Thermal correction to Enthalpy in gas phase: 0.838847

Thermal correction to Gibbs Free Energy in gas phase: 0.725442

SCF energy in solvent: -3509.08223301

Co 0.404079 0.109147 0.324763

P 0.108826 2.241491 -0.075112

P 0.584476 -1.760664 -0.853516

B -1.580826 -0.108132 0.250920

C 1.127233 -0.628094 2.052878

H -0.744874 0.119585 1.296399

N 2.256595 0.437381 -0.336009

O -2.468274 0.943079 -0.033713

O -2.327443 -1.284204 0.400953

C -3.788617 0.425284 -0.198432

C -3.702134 -0.931747 0.569086

C -4.039168 0.248494 -1.693121

C -4.779009 1.422295 0.378015

C -4.581260 -2.037225 0.012090

C -3.949368 -0.781579 2.069107

H -5.066317 -0.059070 -1.895374

H -3.860350 1.200849 -2.194420

H -3.362328 -0.491403 -2.119436

H -4.775409 2.332351 -0.223914

H -5.791590 1.013062 0.367888

H -4.520042 1.690934 1.400700

H -4.431631 -2.949912 0.590174

H -5.635102 -1.758853 0.080689

H -4.347836 -2.254208 -1.028679

H -4.995524 -0.561859 2.287443

H -3.680271 -1.715503 2.562991

H -3.330135 0.010452 2.492818

C 2.364927 -0.246613 2.590788

C 0.421359 -1.573742 2.815384

C 2.870530 -0.772568 3.774275

H 2.977006 0.488430 2.075186

C 0.912564 -2.112605 3.997123

H -0.558134 -1.900612 2.477624

C 2.148858 -1.717416 4.486401

H 3.835101 -0.438568 4.142171

H 0.323329 -2.843078 4.541468

H 2.538321 -2.132279 5.408179

C -0.411655 2.855048 -1.751510

C 1.863223 2.782348 0.085036

C -0.791278 3.351114 1.119781

C 0.559196 -1.658661 -2.714561

C -0.098490 -3.415189 -0.345608

C 2.397792 -1.954691 -0.569797

C 3.022224 -0.604707 -0.721040

C 2.756031 1.687185 -0.413437

H -1.398008 2.374716 -1.862775

C 0.524327 2.274973 -2.815783

C -0.578981 4.361408 -1.953777

H 2.106308 3.747467 -0.381301

H 2.034839 2.881433 1.169728

H -1.772596 3.506270 0.642983

C -0.129462 4.715533 1.356930

C -1.024103 2.652751 2.463798

H 1.278043 -0.833068 -2.872454

C 1.080344 -2.863468 -3.502929  
C -0.791464 -1.172008 -3.244477  
H -0.379279 -3.225993 0.701812  
C -1.376723 -3.800222 -1.099048  
C 0.901260 -4.576656 -0.362782  
H 2.495774 -2.257840 0.484872  
H 2.900207 -2.701074 -1.198410  
C 4.304636 -0.419909 -1.230307  
C 4.032426 1.934159 -0.911704  
H 0.097246 2.409228 -3.821755  
H 1.505274 2.778855 -2.804879  
H 0.693291 1.201717 -2.655070  
H -0.911526 4.565585 -2.984632  
H -1.325909 4.798404 -1.276341  
H 0.372530 4.900075 -1.810661  
H 0.142291 5.238595 0.431235  
H -0.813867 5.368967 1.920938  
H 0.783335 4.610121 1.964103  
H -1.691508 1.789056 2.357906  
H -0.082245 2.286603 2.900925  
H -1.483829 3.356872 3.175651  
H 2.073275 -3.190963 -3.161325  
H 0.400650 -3.724854 -3.432390  
H 1.170654 -2.605668 -4.570675  
H -1.142138 -0.299925 -2.672737  
H -0.707063 -0.878342 -4.302987  
H -1.560390 -1.955952 -3.177099  
H -2.089390 -2.969062 -1.135337  
H -1.160397 -4.134307 -2.124805  
H -1.868493 -4.638514 -0.580594  
H 0.396766 -5.496935 -0.026798

H 1.295033 -4.768983 -1.372747  
H 1.751275 -4.409111 0.312485  
C 4.817913 0.867324 -1.331932  
H 4.886173 -1.287379 -1.541854  
H 4.396482 2.960068 -0.966290  
H 5.818246 1.037345 -1.732958

#### 14

SCF energy in gas phase: -3508.84304989

Thermal correction to Enthalpy in gas phase: 0.838798

Thermal correction to Gibbs Free Energy in gas phase: 0.719398

SCF energy in solvent: -3509.090535

Co -0.366168 -0.000621 0.135815  
P -0.358377 -2.178189 -0.212392  
P -0.306515 2.191267 -0.101133  
B 1.598176 -0.031405 0.181764  
C -1.868022 -0.015773 1.540934  
H 0.624863 -0.032581 1.270337  
N -1.710228 0.055980 -1.370343  
O 2.455517 1.088968 0.283228  
O 2.432391 -1.171836 0.210999  
C 3.805183 0.683265 0.090101  
C 3.759180 -0.797127 0.567459  
C 4.716426 1.592068 0.896166  
C 4.123344 0.812294 -1.399324  
C 3.891726 -0.933025 2.082903  
C 4.739555 -1.727191 -0.125692  
H 5.750649 1.243231 0.851386  
H 4.682024 2.603372 0.487672  
H 4.407053 1.638455 1.938849

|   |           |           |           |   |           |           |           |
|---|-----------|-----------|-----------|---|-----------|-----------|-----------|
| H | 3.930046  | 1.838989  | -1.713150 | H | -2.725544 | -2.389611 | -0.354267 |
| H | 5.167445  | 0.577971  | -1.612968 | H | -1.258494 | -2.567182 | 1.877173  |
| H | 3.486696  | 0.153284  | -1.991586 | C | -1.304348 | -4.573668 | 1.136116  |
| H | 3.652239  | -1.958558 | 2.366068  | C | 0.722326  | -3.350553 | 2.055844  |
| H | 4.904080  | -0.709243 | 2.423241  | H | 1.848381  | 2.929399  | -0.729701 |
| H | 3.194807  | -0.267980 | 2.595507  | C | 0.647427  | 4.558677  | -1.452445 |
| H | 5.768780  | -1.402610 | 0.043237  | C | 0.941371  | 2.306725  | -2.560553 |
| H | 4.633422  | -2.737002 | 0.274054  | H | -1.049310 | 2.483704  | 2.072217  |
| H | 4.556745  | -1.765958 | -1.198474 | C | 0.908580  | 3.348268  | 2.113813  |
| C | -1.562607 | -0.041810 | 2.915870  | C | -1.234765 | 4.500468  | 1.387256  |
| C | -3.243752 | -0.012108 | 1.265175  | H | -2.671305 | 2.426108  | -0.174865 |
| C | -2.527051 | -0.063163 | 3.914851  | H | -1.990610 | 3.367427  | -1.524240 |
| H | -0.521968 | -0.046522 | 3.226277  | C | -2.995543 | 1.311891  | -2.955989 |
| C | -4.227837 | -0.033057 | 2.248917  | C | -3.009307 | -1.073380 | -3.037376 |
| H | -3.589760 | 0.007280  | 0.233640  | H | 1.068917  | -1.148234 | -2.438067 |
| C | -3.875515 | -0.059317 | 3.587917  | H | 1.774833  | -2.569428 | -3.259409 |
| H | -2.223129 | -0.083356 | 4.956230  | H | 0.016431  | -2.323437 | -3.267665 |
| H | -5.275143 | -0.029089 | 1.964553  | H | 0.751642  | -5.137132 | -0.762305 |
| H | -4.634075 | -0.076223 | 4.361102  | H | -0.449340 | -4.706193 | -2.001605 |
| C | 0.832216  | -3.028585 | -1.354923 | H | 1.262374  | -4.853791 | -2.433117 |
| C | -1.938351 | -2.334403 | -1.125217 | H | -0.663556 | -5.337914 | 0.676154  |
| C | -0.596672 | -3.224413 | 1.289032  | H | -1.591247 | -4.945257 | 2.132762  |
| C | 0.881272  | 3.063597  | -1.229447 | H | -2.226656 | -4.502217 | 0.540658  |
| C | -0.462134 | 3.179852  | 1.451052  | H | 1.168389  | -2.364177 | 2.243744  |
| C | -1.902595 | 2.426830  | -0.966068 | H | 0.549224  | -3.845211 | 3.023920  |
| C | -2.189426 | 1.232949  | -1.823239 | H | 1.460677  | -3.949334 | 1.497602  |
| C | -2.204023 | -1.081239 | -1.901202 | H | 0.824785  | 5.144895  | -0.541036 |
| H | 1.795398  | -2.932944 | -0.839861 | H | 1.346057  | 4.930421  | -2.219348 |
| C | 0.926108  | -2.217614 | -2.652521 | H | -0.370632 | 4.784905  | -1.808790 |
| C | 0.574431  | -4.508346 | -1.644619 | H | 0.023850  | 2.453382  | -3.154815 |
| H | -2.017693 | -3.231023 | -1.752877 | H | 1.786227  | 2.668416  | -3.167146 |

|                                                                |           |           |           |   |           |           |           |
|----------------------------------------------------------------|-----------|-----------|-----------|---|-----------|-----------|-----------|
| H                                                              | 1.070047  | 1.227497  | -2.392857 | C | -4.025239 | 0.463769  | -2.160782 |
| H                                                              | 1.437080  | 2.388409  | 2.197451  | C | -5.114026 | -0.069266 | 0.018615  |
| H                                                              | 1.555485  | 4.031716  | 1.539834  | H | -5.156320 | 3.092706  | -0.952463 |
| H                                                              | 0.787124  | 3.771723  | 3.122677  | H | -3.734706 | 4.056864  | -0.534143 |
| H                                                              | -0.697475 | 5.281582  | 0.832199  | H | -3.720576 | 3.062775  | -1.992146 |
| H                                                              | -2.228744 | 4.382986  | 0.931407  | H | -3.383328 | 3.103452  | 1.674595  |
| H                                                              | -1.392990 | 4.875801  | 2.410939  | H | -4.910777 | 2.233199  | 1.503360  |
| C                                                              | -3.376955 | 0.142038  | -3.601446 | H | -3.434320 | 1.356629  | 1.945512  |
| H                                                              | -3.327932 | 2.288034  | -3.308904 | H | -4.106368 | -0.581823 | -2.458421 |
| H                                                              | -3.353042 | -2.019262 | -3.455811 | H | -4.913788 | 0.991315  | -2.511680 |
| H                                                              | -3.991210 | 0.176304  | -4.502467 | H | -3.148497 | 0.888381  | -2.652015 |
| <b>TS<sub>14-15</sub></b>                                      |           |           |           | H | -5.998086 | 0.547011  | -0.160098 |
| SCF energy in gas phase: -3508.8340116                         |           |           |           | H | -5.302597 | -1.059558 | -0.399393 |
| Thermal correction to Enthalpy in gas phase: 0.838529          |           |           |           | H | -4.973117 | -0.176298 | 1.093105  |
| Thermal correction to Gibbs Free Energy in gas phase: 0.725189 |           |           |           | C | 1.396804  | -0.963803 | -2.790201 |
| SCF energy in solvent: -3509.08155186                          |           |           |           | C | 2.963926  | -1.254038 | -1.058363 |
| Co                                                             | 0.245598  | -0.053476 | -0.147478 | C | 2.317554  | -1.432265 | -3.718353 |
| P                                                              | -0.515021 | -2.094877 | 0.204048  | H | 0.418062  | -0.672330 | -3.158941 |
| P                                                              | 1.173265  | 1.972656  | 0.085466  | C | 3.905184  | -1.724774 | -1.967405 |
| B                                                              | -1.604563 | 0.622546  | -0.202048 | H | 3.275751  | -1.203359 | -0.015781 |
| C                                                              | 1.672483  | -0.841436 | -1.416258 | C | 3.587790  | -1.815527 | -3.312979 |
| H                                                              | -0.630523 | 0.305647  | -1.311153 | H | 2.042331  | -1.495053 | -4.765918 |
| N                                                              | 1.276784  | -0.455794 | 1.557863  | H | 4.890175  | -2.021067 | -1.621527 |
| O                                                              | -2.083857 | 1.944028  | -0.275602 | H | 4.313376  | -2.179007 | -4.030517 |
| O                                                              | -2.740155 | -0.218513 | -0.267378 | C | -1.865247 | -2.419918 | 1.447168  |
| C                                                              | -3.502053 | 1.959622  | -0.139915 | C | 0.964505  | -2.800403 | 1.023717  |
| C                                                              | -3.887201 | 0.536838  | -0.641161 | C | -0.769740 | -3.181247 | -1.262099 |
| C                                                              | -4.063997 | 3.107756  | -0.960201 | C | 0.349992  | 3.615057  | -0.260603 |
| C                                                              | -3.834146 | 2.169500  | 1.337466  | C | 2.941888  | 2.025005  | -0.477428 |
|                                                                |           |           |           | C | 1.362006  | 1.925459  | 1.914888  |
|                                                                |           |           |           | C | 1.788938  | 0.544957  | 2.303455  |

|   |           |           |           |                                         |                |           |           |
|---|-----------|-----------|-----------|-----------------------------------------|----------------|-----------|-----------|
| C | 1.561629  | -1.731881 | 1.892049  | H                                       | 1.842017       | 4.486692  | -1.634769 |
| H | -2.784291 | -2.223421 | 0.878055  | H                                       | 0.602466       | 5.605584  | -1.045390 |
| C | -1.795608 | -1.399125 | 2.590818  | H                                       | 1.920254       | 5.115961  | 0.030415  |
| C | -1.931369 | -3.831814 | 2.038742  | H                                       | 0.188686       | 4.494524  | 1.736311  |
| H | 0.781974  | -3.717318 | 1.597683  | H                                       | -1.104806      | 4.956721  | 0.610418  |
| H | 1.676731  | -3.035857 | 0.218201  | H                                       | -1.128475      | 3.343772  | 1.338129  |
| H | 0.168961  | -2.986567 | -1.805856 | H                                       | 2.290712       | 1.491979  | -2.502760 |
| C | -0.875261 | -4.691636 | -1.038301 | H                                       | 3.042715       | 3.108748  | -2.384439 |
| C | -1.915035 | -2.666308 | -2.136364 | H                                       | 4.039473       | 1.642290  | -2.307672 |
| H | -0.362701 | 3.357311  | -1.056367 | H                                       | 3.735658       | 4.036651  | -0.060671 |
| C | 1.242097  | 4.755756  | -0.757706 | H                                       | 3.892611       | 2.905700  | 1.304961  |
| C | -0.467787 | 4.118477  | 0.934813  | H                                       | 4.941939       | 2.742534  | -0.109690 |
| H | 3.241856  | 1.006664  | -0.184615 | C                                       | 2.931976       | -1.011568 | 3.729123  |
| C | 3.074666  | 2.077072  | -2.004696 | H                                       | 3.028496       | 1.140569  | 3.955158  |
| C | 3.915381  | 2.987296  | 0.208191  | H                                       | 2.585658       | -3.084811 | 3.209568  |
| H | 2.021415  | 2.692863  | 2.340640  | H                                       | 3.585165       | -1.229197 | 4.575492  |
| H | 0.350468  | 2.080615  | 2.318269  | <b>15</b>                               |                |           |           |
| C | 2.629959  | 0.301139  | 3.385536  | SCF energy in gas phase:                | -3508.8506709  |           |           |
| C | 2.380895  | -2.040031 | 2.975971  | Thermal correction to Enthalpy in gas   |                |           |           |
| H | -1.686112 | -0.374238 | 2.213426  | phase:                                  | 0.839525       |           |           |
| H | -2.709637 | -1.458637 | 3.202608  | Thermal correction to Gibbs Free Energy |                |           |           |
| H | -0.940531 | -1.606200 | 3.256162  | in gas phase:                           | 0.724641       |           |           |
| H | -2.025576 | -4.619703 | 1.283596  | SCF energy in solvent:                  | -3509.09887304 |           |           |
| H | -1.048254 | -4.057836 | 2.657771  | Co                                      | 0.410659       | -0.048514 | -0.282814 |
| H | -2.807479 | -3.905050 | 2.702985  | P                                       | 0.435265       | -2.219586 | -0.182673 |
| H | -1.875992 | -4.983570 | -0.686851 | P                                       | 0.326479       | 2.101734  | -0.013118 |
| H | -0.705824 | -5.212618 | -1.993894 | B                                       | -1.593241      | 0.001634  | -0.328428 |
| H | -0.132728 | -5.071436 | -0.320621 | C                                       | 2.422250       | -0.041228 | -0.561248 |
| H | -1.776903 | -1.607443 | -2.390789 | H                                       | 0.233869       | 0.000896  | -1.727300 |
| H | -1.960954 | -3.248867 | -3.069673 | N                                       | 0.513126       | -0.133961 | 1.747365  |
| H | -2.886844 | -2.760979 | -1.626340 | O                                       | -2.416111      | 0.183992  | 0.790899  |

|   |           |           |           |   |           |           |           |
|---|-----------|-----------|-----------|---|-----------|-----------|-----------|
| O | -2.414861 | -0.114402 | -1.447156 | C | 1.359510  | -3.323759 | -1.354451 |
| C | -3.800323 | 0.079533  | 0.449897  | C | -0.978090 | 3.099974  | -0.859450 |
| C | -3.788241 | 0.117730  | -1.126185 | C | 1.914083  | 3.064666  | -0.049723 |
| C | -4.538801 | 1.236395  | 1.108961  | C | -0.228917 | 2.175250  | 1.746186  |
| C | -4.320030 | -1.232240 | 1.031971  | C | 0.223181  | 0.949101  | 2.488149  |
| C | -4.187806 | 1.465463  | -1.724323 | C | 0.872370  | -1.282995 | 2.349415  |
| C | -4.637215 | -0.957112 | -1.792939 | H | -1.733166 | -2.468834 | 0.702628  |
| H | -5.597019 | 1.234305  | 0.840373  | C | -1.018262 | -4.485853 | 0.843114  |
| H | -4.462809 | 1.140978  | 2.193048  | C | -1.886766 | -3.377381 | -1.241668 |
| H | -4.112407 | 2.197532  | 0.824546  | H | 1.162667  | -3.385277 | 1.922362  |
| H | -4.134676 | -1.236430 | 2.106766  | H | 2.352146  | -2.273054 | 1.224888  |
| H | -5.392018 | -1.348838 | 0.864795  | H | 0.886167  | -4.314769 | -1.252179 |
| H | -3.810734 | -2.091684 | 0.599290  | C | 1.152579  | -2.845341 | -2.797030 |
| H | -3.984005 | 1.443656  | -2.795016 | C | 2.850716  | -3.491024 | -1.044126 |
| H | -5.250463 | 1.665817  | -1.577900 | H | -1.881926 | 2.610050  | -0.462226 |
| H | -3.623056 | 2.291094  | -1.298027 | C | -0.986151 | 2.889624  | -2.376369 |
| H | -5.693885 | -0.821336 | -1.553202 | C | -1.062228 | 4.581055  | -0.485723 |
| H | -4.521927 | -0.882822 | -2.874879 | H | 2.637182  | 2.301301  | 0.272760  |
| H | -4.339475 | -1.958061 | -1.492780 | C | 2.287076  | 3.444209  | -1.486865 |
| C | 2.978006  | 0.061956  | -1.846856 | C | 2.055667  | 4.256555  | 0.901048  |
| C | 3.372961  | -0.067438 | 0.471673  | H | 0.050290  | 3.091386  | 2.280916  |
| C | 4.344317  | 0.101622  | -2.088999 | H | -1.328329 | 2.128999  | 1.704190  |
| H | 2.310422  | 0.122937  | -2.699062 | C | 0.289775  | 0.914061  | 3.880115  |
| C | 4.745759  | -0.032835 | 0.253955  | C | 0.925577  | -1.390454 | 3.737064  |
| H | 3.043917  | -0.097005 | 1.507307  | H | -0.701833 | -4.344368 | 1.886080  |
| C | 5.245593  | 0.043172  | -1.036091 | H | -1.995769 | -4.993469 | 0.869064  |
| H | 4.707607  | 0.179299  | -3.108229 | H | -0.307619 | -5.177153 | 0.361231  |
| H | 5.426354  | -0.062068 | 1.098371  | H | -1.968912 | -2.447942 | -1.821410 |
| H | 6.313286  | 0.067116  | -1.216972 | H | -1.383160 | -4.137548 | -1.859270 |
| C | -1.144779 | -3.163081 | 0.081683  | H | -2.905352 | -3.750008 | -1.044350 |
| C | 1.282099  | -2.407230 | 1.441316  | H | 1.688846  | -1.903160 | -2.965951 |

|                                                                |           |           |           |   |           |           |           |
|----------------------------------------------------------------|-----------|-----------|-----------|---|-----------|-----------|-----------|
| H                                                              | 1.543246  | -3.599045 | -3.499189 | B | 1.414228  | -0.280016 | -1.068566 |
| H                                                              | 0.095004  | -2.669809 | -3.035908 | C | -2.175106 | 0.282787  | -1.056611 |
| H                                                              | 3.020237  | -3.997130 | -0.082098 | H | 0.232210  | -0.135033 | -1.541205 |
| H                                                              | 3.314172  | -4.113535 | -1.825759 | N | 0.180554  | -0.029030 | 1.830753  |
| H                                                              | 3.376475  | -2.525177 | -1.029955 | O | 2.024551  | -1.540627 | -1.020907 |
| H                                                              | -0.982667 | 1.819432  | -2.623410 | O | 2.376735  | 0.672567  | -1.391059 |
| H                                                              | -1.894303 | 3.340836  | -2.807530 | C | 3.443620  | -1.362502 | -1.012368 |
| H                                                              | -0.120246 | 3.364318  | -2.858721 | C | 3.599556  | 0.014017  | -1.731440 |
| H                                                              | -0.223089 | 5.154594  | -0.906144 | C | 4.093518  | -2.534465 | -1.725921 |
| H                                                              | -1.989176 | 5.014708  | -0.894684 | C | 3.898267  | -1.327835 | 0.446331  |
| H                                                              | -1.073662 | 4.740731  | 0.603192  | C | 3.635444  | -0.111883 | -3.252605 |
| H                                                              | 2.144817  | 2.601686  | -2.177862 | C | 4.773037  | 0.850959  | -1.254373 |
| H                                                              | 1.693322  | 4.298764  | -1.847809 | H | 5.171387  | -2.381986 | -1.814910 |
| H                                                              | 3.348452  | 3.731964  | -1.532701 | H | 3.926425  | -3.450005 | -1.156546 |
| H                                                              | 1.322954  | 5.052796  | 0.708385  | H | 3.676535  | -2.674252 | -2.721336 |
| H                                                              | 1.969410  | 3.959673  | 1.956595  | H | 3.617677  | -2.264561 | 0.930151  |
| H                                                              | 3.058102  | 4.696884  | 0.776488  | H | 4.980267  | -1.216965 | 0.527705  |
| C                                                              | 0.634776  | -0.273732 | 4.512679  | H | 3.420209  | -0.512296 | 0.990854  |
| H                                                              | 0.054593  | 1.810847  | 4.453440  | H | 3.541025  | 0.883274  | -3.687837 |
| H                                                              | 1.213212  | -2.337060 | 4.194617  | H | 4.570814  | -0.554180 | -3.599278 |
| H                                                              | 0.680971  | -0.328497 | 5.601590  | H | 2.804231  | -0.718743 | -3.613554 |
| <b>TS<sub>15-16</sub></b>                                      |           |           |           | H | 5.716301  | 0.335359  | -1.448049 |
| SCF energy in gas phase: -3508.83433279                        |           |           |           | H | 4.787765  | 1.799650  | -1.792576 |
| Thermal correction to Enthalpy in gas phase: 0.838177          |           |           |           | H | 4.704790  | 1.066054  | -0.190203 |
| Thermal correction to Gibbs Free Energy in gas phase: 0.724345 |           |           |           | C | -2.234674 | 0.264862  | -2.459912 |
| SCF energy in solvent: -3509.08116893                          |           |           |           | C | -3.422269 | 0.449050  | -0.430701 |
| Co                                                             | -0.433253 | 0.089964  | -0.056836 | C | -3.416291 | 0.404375  | -3.176956 |
| P                                                              | -0.265166 | 2.285854  | 0.244309  | H | -1.315487 | 0.135494  | -3.024916 |
| P                                                              | -0.897912 | -2.008136 | 0.264320  | C | -4.616655 | 0.587112  | -1.128185 |
|                                                                |           |           |           | H | -3.475303 | 0.481519  | 0.652911  |
|                                                                |           |           |           | C | -4.623328 | 0.566388  | -2.514223 |

|   |           |           |           |                                       |                |           |           |
|---|-----------|-----------|-----------|---------------------------------------|----------------|-----------|-----------|
| H | -3.392530 | 0.385352  | -4.261379 | H                                     | 2.231241       | 2.886952  | 2.053477  |
| H | -5.546582 | 0.713008  | -0.583562 | H                                     | 0.754234       | 5.218745  | -0.502585 |
| H | -5.549198 | 0.673881  | -3.066003 | H                                     | 0.953731       | 4.981402  | 1.250746  |
| C | 1.358997  | 3.178744  | 0.067803  | H                                     | 2.376019       | 5.083198  | 0.197026  |
| C | -0.517245 | 2.279619  | 2.064077  | H                                     | -1.197466      | 5.440399  | 0.331055  |
| C | -1.590256 | 3.396717  | -0.403518 | H                                     | -2.895378      | 5.070985  | -0.011175 |
| C | -0.720725 | -3.201847 | -1.136487 | H                                     | -2.135446      | 4.434204  | 1.456017  |
| C | -2.466100 | -2.447156 | 1.148253  | H                                     | -1.144006      | 2.759462  | -2.442655 |
| C | 0.424460  | -2.418071 | 1.476900  | H                                     | -2.223053      | 4.164536  | -2.333408 |
| C | 0.584605  | -1.211771 | 2.359246  | H                                     | -0.481605      | 4.365866  | -2.036607 |
| C | 0.130696  | 1.053391  | 2.642564  | H                                     | -2.457359      | -2.338723 | -2.161034 |
| H | 1.671651  | 2.946664  | -0.961191 | H                                     | -1.839216      | -3.845379 | -2.878069 |
| C | 2.400854  | 2.566141  | 1.013077  | H                                     | -2.789336      | -3.905804 | -1.382730 |
| C | 1.345625  | 4.697037  | 0.260494  | H                                     | -0.736786      | -5.145156 | -0.097848 |
| H | -0.194259 | 3.193484  | 2.582401  | H                                     | -0.005734      | -5.161194 | -1.714575 |
| H | -1.607001 | 2.179362  | 2.208497  | H                                     | 0.888526       | -4.463539 | -0.352733 |
| H | -2.458042 | 2.720558  | -0.363746 | H                                     | -2.698145      | -4.575395 | 0.630262  |
| C | -1.958967 | 4.652154  | 0.391773  | H                                     | -1.830435      | -4.287891 | 2.156092  |
| C | -1.336803 | 3.688352  | -1.886622 | H                                     | -3.585883      | -4.056698 | 2.072962  |
| H | 0.003923  | -2.677657 | -1.777267 | H                                     | -1.946088      | -1.887634 | 3.201375  |
| C | -2.029618 | -3.324275 | -1.926867 | H                                     | -2.449620      | -0.516743 | 2.189407  |
| C | -0.113635 | -4.565085 | -0.793988 | H                                     | -3.661813      | -1.679311 | 2.791066  |
| H | -3.249474 | -2.155407 | 0.429526  | C                                     | 1.095089       | -0.176043 | 4.468690  |
| C | -2.647134 | -3.923558 | 1.511722  | H                                     | 1.404570       | -2.275252 | 4.032238  |
| C | -2.637407 | -1.577771 | 2.400801  | H                                     | 0.543146       | 1.915178  | 4.565264  |
| H | 0.259418  | -3.325062 | 2.074744  | H                                     | 1.472857       | -0.228425 | 5.490682  |
| H | 1.328707  | -2.554624 | 0.868337  | <b>16</b>                             |                |           |           |
| C | 1.067187  | -1.307584 | 3.660065  | SCF energy in gas phase:              | -3096.92966761 |           |           |
| C | 0.592582  | 1.013106  | 3.954934  | Thermal correction to Enthalpy in gas |                |           |           |
| H | 2.394931  | 1.470128  | 0.981934  | phase:                                | 0.635286       |           |           |
| H | 3.407419  | 2.906376  | 0.724971  |                                       |                |           |           |

Thermal correction to Gibbs Free Energy  
in gas phase: 0.5374

SCF energy in solvent: -3097.17604288

Co -0.035284 0.016684 -0.012627

P -2.093627 0.598410 -0.193618

P 2.103507 -0.249115 0.079577

C -0.482776 -1.860165 0.092069

N 0.372264 1.961414 -0.053013

C -0.384023 -2.745968 -0.994361

C -1.000046 -2.432879 1.267618

C -0.775064 -4.077243 -0.927092

H -0.002900 -2.377642 -1.943337

C -1.392850 -3.761999 1.355132

H -1.119672 -1.810352 2.151834

C -1.286758 -4.598295 0.252699

H -0.683214 -4.711927 -1.802422

H -1.791445 -4.147039 2.287994

H -1.596214 -5.634592 0.312054

C -3.304353 -0.129981 -1.386797

C -1.930815 2.338931 -0.784465

C -3.046972 0.751219 1.387108

C 2.936439 -0.361733 -1.585716

C 2.957485 -1.457955 1.183849

C 2.599412 1.392515 0.753736

C 1.606248 2.417481 0.281185

C -0.571697 2.867324 -0.408096

H -4.125104 0.599548 -1.506044

C -3.886714 -1.452120 -0.871132

C -2.633327 -0.340726 -2.748069

H -2.002290 2.311476 -1.883075

H -2.721842 3.018326 -0.433601

H -3.158223 -0.296380 1.714900

C -2.181703 1.472476 2.426330

C -4.435185 1.383591 1.276759

H 2.160583 0.055976 -2.248553

C 3.134108 -1.827136 -1.991767

C 4.208172 0.465362 -1.790228

H 2.727194 -2.430657 0.717405

C 4.475391 -1.305984 1.307647

C 2.288995 -1.449702 2.563083

H 2.497934 1.299493 1.847219

H 3.630987 1.710165 0.550041

C 1.934910 3.769400 0.231488

C -0.304562 4.234203 -0.449073

H -4.444319 -1.328552 0.068596

H -4.584527 -1.864004 -1.617177

H -3.094481 -2.196005 -0.699239

H -2.205920 0.586242 -3.160213

H -1.821363 -1.077168 -2.662697

H -3.367860 -0.719035 -3.476598

H -2.004472 2.523822 2.142557

H -2.680174 1.475444 3.408420

H -1.199615 0.986046 2.528561

H -5.094228 0.835468 0.588196

H -4.926337 1.398119 2.262869

H -4.378675 2.428304 0.929504

H 2.231282 -2.427316 -1.806793

H 3.372456 -1.893691 -3.064813

H 3.966809 -2.292263 -1.441381

H 5.011404 0.182801 -1.093041

H 4.590372 0.313448 -2.812700

H 4.020153 1.543205 -1.672278

H 4.992736 -1.436768 0.347437  
H 4.749224 -0.315829 1.707571  
H 4.876200 -2.060546 2.003417  
H 2.497022 -0.514441 3.109114  
H 1.200795 -1.567988 2.478460  
H 2.680183 -2.276880 3.175765  
C 0.967495 4.696434 -0.137148  
H 2.943734 4.083982 0.499993  
H -1.098258 4.923370 -0.739111  
H 1.199837 5.761777 -0.174760

**TS<sub>16-17</sub>**

SCF energy in gas phase: -3508.83608406

Thermal correction to Enthalpy in gas  
phase: 0.838327

Thermal correction to Gibbs Free Energy  
in gas phase: 0.721767

SCF energy in solvent: -3509.0838852

Co -0.444671 0.092126 0.075728  
P -1.427724 -1.865836 0.294567  
P -0.164582 2.252758 0.012379  
B 1.363321 -0.453287 -1.125706  
H 0.189102 -0.295808 -1.484247  
N -2.078677 0.559498 -1.066916  
C 0.433475 -0.027324 1.829831  
C -0.245028 0.491582 2.950665  
C 1.685570 -0.581987 2.136587  
C 0.282491 0.496678 4.235475  
H -1.239127 0.907731 2.822274  
C 2.235877 -0.580971 3.412623  
H 2.245414 -1.067707 1.349415  
C 1.542585 -0.029614 4.478127

H -0.295561 0.917045 5.051948  
H 3.213993 -1.023017 3.574319  
H 1.966180 -0.022106 5.474980  
O 2.308315 0.420397 -1.644475  
O 1.936442 -1.684641 -0.860267  
C 3.609596 -0.167617 -1.521448  
C 3.272716 -1.695490 -1.379363  
C 4.282243 0.436746 -0.291140  
C 4.419567 0.184852 -2.758706  
C 4.174191 -2.454091 -0.421166  
C 3.209989 -2.424897 -2.719190  
H 5.286727 0.035588 -0.149153  
H 4.366234 1.515539 -0.431983  
H 3.700272 0.264304 0.613132  
H 4.590870 1.261610 -2.785964  
H 5.391520 -0.312702 -2.736209  
H 3.902256 -0.098868 -3.673075  
H 3.851110 -3.494090 -0.362828  
H 5.208175 -2.436863 -0.772533  
H 4.141091 -2.032468 0.581666  
H 4.195993 -2.523000 -3.175631  
H 2.805058 -3.423668 -2.552580  
H 2.550126 -1.905806 -3.415553  
C -1.093995 -3.212941 -0.946456  
C -3.165437 -1.370002 -0.088923  
C -1.535713 -2.672290 1.954380  
C 1.507868 3.034612 0.008858  
C -1.213236 3.280727 1.149310  
C -0.854726 2.557948 -1.673922  
C -2.066635 1.677838 -1.824401  
C -3.166742 -0.235649 -1.075338

|   |           |           |           |                                         |                |           |           |
|---|-----------|-----------|-----------|-----------------------------------------|----------------|-----------|-----------|
| H | -0.019184 | -3.415299 | -0.806807 | H                                       | 1.515454       | 4.038803  | 1.964751  |
| C | -1.284886 | -2.684746 | -2.374129 | H                                       | 1.898319       | 2.298827  | 2.037496  |
| C | -1.877860 | -4.517573 | -0.779950 | H                                       | 1.140203       | 5.155991  | -0.484857 |
| H | -3.822344 | -2.190099 | -0.412916 | H                                       | 2.771773       | 4.566047  | -0.845730 |
| H | -3.574538 | -0.977580 | 0.857767  | H                                       | 1.421723       | 4.115024  | -1.899038 |
| H | -1.484249 | -1.792664 | 2.616840  | H                                       | -3.192981      | 3.237297  | 2.039520  |
| C | -0.268968 | -3.494384 | 2.220872  | H                                       | -3.204131      | 2.979230  | 0.282494  |
| C | -2.810946 | -3.444377 | 2.303978  | H                                       | -2.679370      | 1.666551  | 1.360369  |
| H | 2.099566  | 2.234307  | -0.455996 | H                                       | -1.911724      | 5.285285  | 1.592843  |
| C | 2.025451  | 3.214596  | 1.440768  | H                                       | -0.220877      | 5.239752  | 1.067642  |
| C | 1.705268  | 4.286983  | -0.850097 | H                                       | -1.530283      | 5.041662  | -0.121730 |
| H | -0.751191 | 3.087914  | 2.132085  | C                                       | -4.230107      | 1.152148  | -2.721851 |
| C | -2.652777 | 2.754949  | 1.210040  | H                                       | -3.078447      | 2.902590  | -3.274032 |
| C | -1.209050 | 4.791431  | 0.902531  | H                                       | -5.116070      | -0.640719 | -1.892906 |
| H | -0.067374 | 2.215197  | -2.366574 | H                                       | -5.070421      | 1.378364  | -3.380109 |
| H | -1.090822 | 3.603040  | -1.919071 | <b>17</b>                               |                |           |           |
| C | -3.125799 | 1.997185  | -2.668653 | SCF energy in gas phase:                | -3508.86065378 |           |           |
| C | -4.254946 | 0.027749  | -1.905200 | Thermal correction to Enthalpy in gas   |                |           |           |
| H | -0.896894 | -3.417951 | -3.098252 | phase:                                  | 0.83876        |           |           |
| H | -2.352448 | -2.532713 | -2.604372 | Thermal correction to Gibbs Free Energy |                |           |           |
| H | -0.761206 | -1.735163 | -2.543313 | in gas phase:                           | 0.722965       |           |           |
| H | -1.641651 | -5.039093 | 0.156033  | SCF energy in solvent:                  | -3509.1080468  |           |           |
| H | -2.966725 | -4.346690 | -0.808164 | Co                                      | -0.363447      | -0.085269 | -0.240656 |
| H | -1.637466 | -5.204381 | -1.607679 | P                                       | -0.396367      | -2.253416 | -0.266670 |
| H | -0.260825 | -4.434233 | 1.647325  | P                                       | -0.685236      | 2.066490  | -0.433271 |
| H | 0.635933  | -2.925467 | 1.966775  | B                                       | 1.552353       | 0.084228  | -0.196757 |
| H | -0.209790 | -3.754872 | 3.288732  | H                                       | 0.073314       | -0.037894 | -1.681826 |
| H | -2.769729 | -3.754236 | 3.360797  | N                                       | -2.363147      | -0.237874 | -0.776861 |
| H | -3.717499 | -2.832806 | 2.183309  | C                                       | -0.715558      | -0.131018 | 1.751339  |
| H | -2.937406 | -4.354207 | 1.701417  | C                                       | -2.002085      | -0.238914 | 2.307231  |
| H | 3.099815  | 3.456832  | 1.418708  | C                                       | 0.306349       | -0.013630 | 2.707410  |

|   |           |           |           |   |           |           |           |
|---|-----------|-----------|-----------|---|-----------|-----------|-----------|
| C | -2.251895 | -0.248686 | 3.674910  | C | 0.467463  | 3.184299  | -1.358772 |
| H | -2.870104 | -0.292518 | 1.657103  | C | -1.161409 | 2.981501  | 1.106524  |
| C | 0.081116  | -0.020984 | 4.077289  | C | -2.190897 | 2.065325  | -1.498551 |
| H | 1.328611  | 0.114378  | 2.375262  | C | -3.017282 | 0.835278  | -1.251767 |
| C | -1.206075 | -0.145806 | 4.577337  | C | -3.009722 | -1.405574 | -0.629325 |
| H | -3.272299 | -0.332254 | 4.034111  | H | -0.465401 | -4.226144 | -1.626679 |
| H | 0.919902  | 0.076813  | 4.758453  | C | 1.405210  | -3.319057 | -2.184472 |
| H | -1.390099 | -0.153386 | 5.644765  | C | -0.870080 | -2.616540 | -2.990663 |
| O | 2.249374  | 1.224974  | 0.219538  | H | -2.547771 | -3.504600 | -0.498199 |
| O | 2.492978  | -0.865187 | -0.596760 | H | -2.399778 | -2.591232 | 1.016496  |
| C | 3.652455  | 0.960517  | 0.273513  | H | -0.342894 | -2.899361 | 1.973456  |
| C | 3.793866  | -0.283654 | -0.663967 | C | 1.716165  | -3.062936 | 1.473061  |
| C | 4.009952  | 0.659834  | 1.726623  | C | -0.057030 | -4.788983 | 0.978475  |
| C | 4.399159  | 2.200555  | -0.189367 | H | 1.342784  | 3.225748  | -0.693940 |
| C | 4.817081  | -1.313106 | -0.212686 | C | -0.051765 | 4.606214  | -1.593756 |
| C | 4.055340  | 0.087259  | -2.122196 | C | 0.929539  | 2.567555  | -2.681943 |
| H | 5.085504  | 0.530095  | 1.857434  | H | -1.567438 | 2.165626  | 1.721882  |
| H | 3.681840  | 1.493123  | 2.349205  | C | -2.251457 | 4.051484  | 1.011065  |
| H | 3.508198  | -0.241402 | 2.079914  | C | 0.100781  | 3.475385  | 1.823575  |
| H | 4.232339  | 3.011997  | 0.520748  | H | -1.809429 | 1.995839  | -2.530495 |
| H | 5.473607  | 2.012049  | -0.243584 | H | -2.796820 | 2.978449  | -1.436349 |
| H | 4.053064  | 2.529611  | -1.168105 | C | -4.376190 | 0.782914  | -1.556425 |
| H | 4.829870  | -2.144623 | -0.918988 | C | -4.362669 | -1.532187 | -0.942741 |
| H | 5.818628  | -0.878361 | -0.180838 | H | 1.519414  | -3.919993 | -3.100927 |
| H | 4.576786  | -1.710899 | 0.771397  | H | 1.836861  | -2.323394 | -2.353155 |
| H | 5.059715  | 0.490302  | -2.263004 | H | 1.993919  | -3.799693 | -1.390542 |
| H | 3.954720  | -0.809218 | -2.735145 | H | -1.956953 | -2.633908 | -2.817864 |
| H | 3.332379  | 0.820909  | -2.477553 | H | -0.572955 | -1.571144 | -3.164160 |
| C | -0.076843 | -3.211951 | -1.822597 | H | -0.672439 | -3.193709 | -3.907604 |
| C | -2.213570 | -2.549496 | -0.068244 | H | 2.389905  | -3.364684 | 0.659136  |
| C | 0.244078  | -3.294675 | 1.127090  | H | 1.908953  | -2.006360 | 1.689213  |

|                                                               |           |           |           |   |           |           |           |
|---------------------------------------------------------------|-----------|-----------|-----------|---|-----------|-----------|-----------|
| H                                                             | 1.973653  | -3.650314 | 2.368550  | H | 0.104440  | -0.066736 | -1.552973 |
| H                                                             | 0.180718  | -5.312422 | 1.917768  | N | -2.365986 | -0.418035 | -0.741141 |
| H                                                             | -1.114278 | -4.991096 | 0.748647  | C | -0.769435 | -0.090421 | 1.833960  |
| H                                                             | 0.556451  | -5.246567 | 0.186398  | C | -2.055244 | -0.283320 | 2.364327  |
| H                                                             | 0.679905  | 5.172896  | -2.191557 | C | 0.220541  | 0.159995  | 2.798278  |
| H                                                             | -1.001268 | 4.611701  | -2.153491 | C | -2.335700 | -0.241099 | 3.725772  |
| H                                                             | -0.205028 | 5.158358  | -0.657931 | H | -2.891548 | -0.456881 | 1.692739  |
| H                                                             | 0.124080  | 2.566766  | -3.434952 | C | -0.037238 | 0.207090  | 4.161088  |
| H                                                             | 1.758924  | 3.162265  | -3.096921 | H | 1.238648  | 0.346851  | 2.474652  |
| H                                                             | 1.263840  | 1.530922  | -2.557101 | C | -1.323466 | 0.002734  | 4.639718  |
| H                                                             | -2.435081 | 4.469839  | 2.013690  | H | -3.352398 | -0.395591 | 4.071765  |
| H                                                             | -1.988921 | 4.889163  | 0.349409  | H | 0.772367  | 0.408597  | 4.854550  |
| H                                                             | -3.206649 | 3.630222  | 0.662409  | H | -1.532047 | 0.037931  | 5.702067  |
| H                                                             | -0.144265 | 3.756159  | 2.859088  | O | 2.151556  | 1.404152  | -0.016769 |
| H                                                             | 0.868906  | 2.688841  | 1.855948  | O | 2.476780  | -0.774697 | -0.509517 |
| H                                                             | 0.535628  | 4.359611  | 1.330073  | C | 3.565502  | 1.204777  | 0.008952  |
| C                                                             | -5.057557 | -0.418831 | -1.399224 | C | 3.713286  | -0.121908 | -0.794378 |
| H                                                             | -4.882420 | 1.674131  | -1.927669 | C | 3.985393  | 1.063670  | 1.469813  |
| H                                                             | -4.859853 | -2.493435 | -0.811688 | C | 4.244788  | 2.413617  | -0.610534 |
| H                                                             | -6.120529 | -0.487913 | -1.636380 | C | 4.859570  | -1.016311 | -0.356759 |
| <b>TS<sub>17-18</sub></b>                                     |           |           |           | C | 3.773752  | 0.107155  | -2.303972 |
| SCF energy in gas phase: -3508.85716935                       |           |           |           | H | 5.069074  | 0.986735  | 1.572569  |
| Thermal correction to Enthalpy in gas phase: 0.837107         |           |           |           | H | 3.647027  | 1.942482  | 2.020113  |
| Thermal correction to Gibbs Free Energy in gas phase: 0.72107 |           |           |           | H | 3.529580  | 0.183313  | 1.924872  |
| SCF energy in solvent: -3509.10465325                         |           |           |           | H | 4.078766  | 3.288751  | 0.019617  |
| Co                                                            | -0.390614 | -0.097143 | -0.134492 | H | 5.322168  | 2.254002  | -0.693853 |
| P                                                             | -0.221870 | -2.272199 | -0.114690 | H | 3.846600  | 2.628469  | -1.601027 |
| P                                                             | -0.868112 | 2.039309  | -0.346512 | H | 4.877106  | -1.917008 | -0.972392 |
| B                                                             | 1.496949  | 0.179766  | -0.211515 | H | 5.817834  | -0.505348 | -0.474795 |
|                                                               |           |           |           | H | 4.749757  | -1.320328 | 0.682694  |
|                                                               |           |           |           | H | 4.718449  | 0.561347  | -2.607535 |

|   |           |           |           |                                         |                |           |           |
|---|-----------|-----------|-----------|-----------------------------------------|----------------|-----------|-----------|
| H | 3.675452  | -0.853051 | -2.811829 | H                                       | -1.329589      | -2.512693 | -2.844747 |
| H | 2.953683  | 0.747433  | -2.632959 | H                                       | 0.227098       | -1.692736 | -3.064430 |
| C | 0.305989  | -3.286462 | -1.585205 | H                                       | -0.023538      | -3.333704 | -3.728616 |
| C | -2.019116 | -2.713936 | -0.086320 | H                                       | 2.541513       | -3.188193 | 1.050608  |
| C | 0.368136  | -3.187943 | 1.381183  | H                                       | 1.929536       | -1.761237 | 1.902662  |
| C | 0.032104  | 3.069429  | -1.602366 | H                                       | 2.031720       | -3.321835 | 2.753466  |
| C | -1.005286 | 3.069466  | 1.195079  | H                                       | 0.375936       | -5.148263 | 2.306254  |
| C | -2.600249 | 1.989370  | -1.002874 | H                                       | -0.894119      | -4.968563 | 1.082030  |
| C | -3.094210 | 0.587895  | -1.241447 | H                                       | 0.801268       | -5.185696 | 0.585744  |
| C | -2.837237 | -1.676077 | -0.796221 | H                                       | 0.093275       | 5.007035  | -2.568197 |
| H | -0.195374 | -4.258053 | -1.430823 | H                                       | -1.521485      | 4.585126  | -1.971306 |
| C | 1.806535  | -3.554065 | -1.716523 | H                                       | -0.255135      | 5.107747  | -0.835530 |
| C | -0.240832 | -2.670222 | -2.876537 | H                                       | -0.951997      | 2.340058  | -3.424020 |
| H | -2.229068 | -3.719866 | -0.474643 | H                                       | 0.692148       | 2.961987  | -3.662918 |
| H | -2.312842 | -2.695654 | 0.976117  | H                                       | 0.437990       | 1.360645  | -2.911729 |
| H | -0.289071 | -2.765684 | 2.160193  | H                                       | -2.023486      | 4.636174  | 2.265752  |
| C | 1.803250  | -2.843798 | 1.787895  | H                                       | -1.718171      | 5.067494  | 0.575213  |
| C | 0.145407  | -4.702170 | 1.326075  | H                                       | -3.025295      | 3.940008  | 0.992092  |
| H | 1.061434  | 3.070524  | -1.213605 | H                                       | 0.316516       | 3.909836  | 2.691024  |
| C | -0.445267 | 4.517866  | -1.740970 | H                                       | 1.086450       | 2.659849  | 1.675707  |
| C | 0.054229  | 2.386513  | -2.973638 | H                                       | 0.810252       | 4.288594  | 1.023927  |
| H | -1.365785 | 2.313958  | 1.910730  | C                                       | -4.768267      | -0.948182 | -2.017865 |
| C | -1.995951 | 4.237965  | 1.238812  | H                                       | -4.859502      | 1.192790  | -2.320357 |
| C | 0.385462  | 3.503214  | 1.670386  | H                                       | -4.383283      | -3.011209 | -1.478486 |
| H | -2.694755 | 2.589888  | -1.919022 | H                                       | -5.704229      | -1.158064 | -2.538318 |
| H | -3.276637 | 2.450202  | -0.268749 | <b>18</b>                               |                |           |           |
| C | -4.299817 | 0.354112  | -1.905337 | SCF energy in gas phase:                | -3508.85919426 |           |           |
| C | -4.035544 | -1.978921 | -1.438197 | Thermal correction to Enthalpy in gas   |                |           |           |
| H | 1.989013  | -4.170362 | -2.611655 | phase:                                  | 0.837822       |           |           |
| H | 2.363903  | -2.614238 | -1.808568 | Thermal correction to Gibbs Free Energy |                |           |           |
| H | 2.210610  | -4.099041 | -0.852084 | in gas phase:                           | 0.720104       |           |           |

|                                       |   |           |           |           |
|---------------------------------------|---|-----------|-----------|-----------|
| SCF energy in solvent: -3509.10630407 | H | 3.318349  | 3.197856  | -1.954994 |
| Co -0.331482 -0.161376 -0.072234      | H | 5.246194  | -0.825424 | -0.525371 |
| P 0.297336 -2.273790 -0.136157        | H | 5.800043  | 0.828279  | -0.240380 |
| P -1.301295 1.808821 -0.207422        | H | 4.864632  | -0.026888 | 1.000657  |
| B 1.424528 0.534434 -0.251841         | H | 4.640272  | 1.237693  | -2.564984 |
| H 0.377294 0.121530 -1.403064         | H | 3.949842  | -0.390538 | -2.551318 |
| N -2.191465 -0.882417 -0.804561       | H | 2.883801  | 1.011610  | -2.671389 |
| C -0.807502 -0.313613 1.851939        | C | 1.211996  | -3.042530 | -1.569982 |
| C -2.040764 -0.800906 2.310812        | C | -1.347458 | -3.090708 | -0.386280 |
| C 0.069432 0.101176 2.868246          | C | 0.887483  | -3.131289 | 1.388706  |
| C -2.377846 -0.875069 3.658383        | C | -0.843105 | 2.858910  | -1.664874 |
| H -2.783460 -1.135265 1.591275        | C | -1.482442 | 2.865490  | 1.299664  |
| C -0.247630 0.036213 4.217393         | C | -3.053381 | 1.348191  | -0.560909 |
| H 1.040286 0.501057 2.595265          | C | -3.144258 | -0.018369 | -1.179374 |
| C -1.479644 -0.455827 4.626083        | C | -2.318385 | -2.185929 | -1.087760 |
| H -3.348603 -1.261093 3.951362        | H | 0.821500  | -4.074233 | -1.610111 |
| H 0.471624 0.373714 4.956015          | C | 2.734826  | -3.137220 | -1.446690 |
| H -1.733392 -0.509135 5.677772        | C | 0.816397  | -2.336492 | -2.870936 |
| O 1.786989 1.897205 -0.270293         | H | -1.275139 | -4.068969 | -0.880387 |
| O 2.615637 -0.211960 -0.321585        | H | -1.752638 | -3.259500 | 0.625967  |
| C 3.200856 2.020772 -0.138542         | H | 0.098966  | -2.849475 | 2.107188  |
| C 3.691945 0.649022 -0.689230         | C | 2.197854  | -2.544042 | 1.921713  |
| C 3.522496 2.207829 1.342909          | C | 0.934987  | -4.658744 | 1.296585  |
| C 3.667367 3.234095 -0.924283         | H | 0.248499  | 2.945950  | -1.561520 |
| C 4.977653 0.129540 -0.070685         | C | -1.450075 | 4.261165  | -1.722581 |
| C 3.800544 0.635718 -2.213894         | C | -1.139244 | 2.097825  | -2.964010 |
| H 4.590015 2.363097 1.507454          | H | -1.700825 | 2.087108  | 2.050040  |
| H 2.987413 3.082419 1.713780          | C | -2.631795 | 3.878865  | 1.343483  |
| H 3.201985 1.341367 1.923337          | C | -0.149947 | 3.504414  | 1.695695  |
| H 3.273054 4.141387 -0.463977         | H | -3.597873 | 2.104318  | -1.142871 |
| H 4.757757 3.300438 -0.925603         | H | -3.547630 | 1.273386  | 0.422376  |

C -4.196277 -0.412099 -2.005429  
 C -3.343793 -2.653542 -1.908365  
 H 3.151730 -3.527288 -2.389466  
 H 3.173971 -2.153728 -1.243813  
 H 3.043993 -3.821805 -0.645001  
 H -0.274497 -2.239802 -2.984948  
 H 1.239485 -1.321956 -2.900663  
 H 1.198932 -2.900403 -3.736461  
 H 3.055862 -2.796010 1.283204  
 H 2.142039 -1.450753 1.985340  
 H 2.393600 -2.941319 2.930024  
 H 1.182465 -5.083959 2.281989  
 H -0.028196 -5.091750 0.986882  
 H 1.703412 -5.006277 0.589385  
 H -1.158937 4.750966 -2.665720  
 H -2.552057 4.239720 -1.694249  
 H -1.099973 4.899793 -0.900797  
 H -2.222667 2.047120 -3.164534  
 H -0.676003 2.619882 -3.815708  
 H -0.745559 1.072011 -2.935109  
 H -2.761868 4.225328 2.381190  
 H -2.436147 4.766237 0.727308  
 H -3.593754 3.451603 1.024275  
 H -0.257686 4.017138 2.664181  
 H 0.636848 2.746493 1.785389  
 H 0.186341 4.246207 0.953583  
 C -4.276080 -1.744002 -2.398679  
 H -4.942894 0.316369 -2.322231  
 H -3.409762 -3.714914 -2.148125  
 H -5.079882 -2.078174 -3.056961

**TS<sub>18-19</sub>**

SCF energy in gas phase: -3508.83557264  
 Thermal correction to Enthalpy in gas phase: 0.836332  
 Thermal correction to Gibbs Free Energy in gas phase: 0.7211  
 SCF energy in solvent: -3509.0837128  
 Co 0.341711 -0.021034 -0.094114  
 P 0.840096 2.080469 -0.400746  
 P 0.826121 -2.068618 -0.608362  
 B -1.573985 -0.012885 -0.192415  
 H 0.112138 0.012420 -1.561122  
 N 2.155407 -0.067186 0.874135  
 C -0.708413 -0.073434 1.684549  
 C -1.009026 1.069969 2.440040  
 C -0.843468 -1.280372 2.388449  
 C -1.364623 1.027766 3.780879  
 H -1.006191 2.039538 1.959127  
 C -1.191332 -1.347619 3.729215  
 H -0.706681 -2.218493 1.866677  
 C -1.449650 -0.187217 4.441774  
 H -1.587344 1.949136 4.307545  
 H -1.275955 -2.313167 4.215468  
 H -1.730191 -0.230263 5.487025  
 O -2.402961 -1.134731 -0.359474  
 O -2.374011 1.136437 -0.324186  
 C -3.764339 -0.723960 -0.262465  
 C -3.683052 0.759746 -0.740647  
 C -4.193715 -0.853011 1.198240  
 C -4.615369 -1.632153 -1.133284  
 C -4.694236 1.693555 -0.098275  
 C -3.742794 0.892581 -2.261484

|   |           |           |           |   |           |           |           |
|---|-----------|-----------|-----------|---|-----------|-----------|-----------|
| H | -5.252034 | -0.618502 | 1.326785  | H | -1.157177 | -3.075688 | 0.105275  |
| H | -4.024875 | -1.880765 | 1.522278  | C | 0.057524  | -4.825804 | -0.150055 |
| H | -3.604622 | -0.201977 | 1.845101  | C | -1.141946 | -3.492171 | -1.964015 |
| H | -4.611366 | -2.642150 | -0.720228 | H | 2.732936  | -3.298692 | 0.474375  |
| H | -5.649930 | -1.282620 | -1.164560 | H | 1.437378  | -2.824062 | 1.587207  |
| H | -4.231153 | -1.681235 | -2.150955 | C | 3.999761  | -1.294191 | 1.776998  |
| H | -4.560912 | 2.703270  | -0.490678 | C | 3.961001  | 1.092497  | 1.933557  |
| H | -5.715212 | 1.374619  | -0.320937 | H | 1.899743  | 4.558057  | -2.201739 |
| H | -4.565050 | 1.728653  | 0.982088  | H | 3.028719  | 4.176218  | -0.881051 |
| H | -4.734801 | 0.658254  | -2.651493 | H | 3.479692  | 3.843629  | -2.563394 |
| H | -3.501893 | 1.920651  | -2.534560 | H | 1.092104  | 0.978437  | -3.123558 |
| H | -3.012474 | 0.234842  | -2.735404 | H | 0.810777  | 2.676369  | -3.569583 |
| C | 2.047133  | 2.415396  | -1.781529 | H | 2.398127  | 1.940802  | -3.869045 |
| C | 1.934379  | 2.339141  | 1.060250  | H | -0.337219 | 4.246043  | -2.398051 |
| C | -0.367569 | 3.483240  | -0.340813 | H | -1.295336 | 2.751284  | -2.177770 |
| C | 1.834789  | -2.294722 | -2.155840 | H | -1.923750 | 4.309794  | -1.603290 |
| C | -0.413540 | -3.445429 | -0.615220 | H | -0.726261 | 5.508450  | 0.329578  |
| C | 2.031866  | -2.489427 | 0.722826  | H | 0.469966  | 4.654456  | 1.317897  |
| C | 2.764348  | -1.239992 | 1.134872  | H | 0.918157  | 5.269022  | -0.289805 |
| C | 2.723964  | 1.080825  | 1.293761  | H | 1.526161  | -4.423711 | -2.637879 |
| H | 2.864523  | 1.728086  | -1.495875 | H | 2.971948  | -3.695222 | -3.356217 |
| C | 2.641258  | 3.825882  | -1.848819 | H | 2.958424  | -4.103883 | -1.633029 |
| C | 1.553149  | 1.974734  | -3.162736 | H | 3.789450  | -1.614695 | -1.445750 |
| H | 2.590930  | 3.218155  | 1.008811  | H | 3.480208  | -1.294201 | -3.164407 |
| H | 1.261398  | 2.473765  | 1.921911  | H | 2.682840  | -0.300816 | -1.913886 |
| H | -1.161861 | 3.063608  | 0.292668  | H | -0.798724 | -5.519637 | -0.135844 |
| C | -1.009532 | 3.705729  | -1.713881 | H | 0.822535  | -5.262657 | -0.806757 |
| C | 0.111989  | 4.794068  | 0.287119  | H | 0.467532  | -4.799441 | 0.870697  |
| H | 1.136302  | -1.988383 | -2.952862 | H | -2.044933 | -4.115858 | -1.875181 |
| C | 2.338629  | -3.709547 | -2.454717 | H | -1.467514 | -2.487064 | -2.266592 |
| C | 3.012149  | -1.314970 | -2.168013 | H | -0.518732 | -3.922203 | -2.762863 |

|                                                       |                |           |           |   |           |           |           |
|-------------------------------------------------------|----------------|-----------|-----------|---|-----------|-----------|-----------|
| C                                                     | 4.613419       | -0.111647 | 2.171589  | H | 4.939165  | -2.279209 | 1.389899  |
| H                                                     | 4.468775       | -2.261198 | 1.959702  | H | 5.043587  | 2.140916  | -0.039950 |
| H                                                     | 4.397757       | 2.041957  | 2.243488  | H | 5.960779  | 0.727398  | -0.575118 |
| H                                                     | 5.585550       | -0.128468 | 2.666829  | H | 4.534886  | 1.262153  | -1.483113 |
| <b>19</b>                                             |                |           |           | H | 5.640462  | -0.016630 | 1.892372  |
| SCF energy in gas phase:                              | -3508.8740588  |           |           | H | 4.511418  | 1.309108  | 2.213633  |
| Thermal correction to Enthalpy in gas phase:          | 0.839508       |           |           | H | 3.995035  | -0.361788 | 2.463491  |
| Thermal correction to Gibbs Free Energy in gas phase: | 0.724091       |           |           | C | 0.635708  | 0.917996  | 2.543393  |
| SCF energy in solvent:                                | -3509.12167641 |           |           | C | 0.271733  | -1.432675 | 2.353927  |
| Co                                                    | -0.358813      | -0.065214 | -0.024713 | C | -0.223782 | 0.971509  | 3.628051  |
| P                                                     | -1.227620      | -1.995167 | -0.650407 | H | 1.158513  | 1.812916  | 2.227699  |
| P                                                     | -0.373306      | 2.058646  | -0.591871 | C | -0.589221 | -1.392536 | 3.443660  |
| B                                                     | 1.844898       | -0.331188 | 0.559169  | H | 0.531599  | -2.383835 | 1.907921  |
| C                                                     | 0.875552       | -0.274602 | 1.845799  | C | -0.861414 | -0.183951 | 4.064680  |
| H                                                     | 1.059322       | -0.326178 | -0.618721 | H | -0.395444 | 1.910255  | 4.142147  |
| N                                                     | -2.165608      | 0.312490  | 0.707557  | H | -1.042221 | -2.305277 | 3.813954  |
| O                                                     | 2.630929       | -1.534529 | 0.447495  | H | -1.537572 | -0.145718 | 4.910218  |
| O                                                     | 2.754840       | 0.778111  | 0.383208  | C | -2.175853 | -2.108839 | -2.247819 |
| C                                                     | 3.871652       | -1.184057 | -0.140556 | C | -2.601713 | -2.080571 | 0.580708  |
| C                                                     | 4.077244       | 0.270193  | 0.389639  | C | -0.496006 | -3.694427 | -0.462329 |
| C                                                     | 3.734738       | -1.224881 | -1.665383 | C | -1.295778 | 2.461322  | -2.155886 |
| C                                                     | 4.928080       | -2.180606 | 0.305754  | C | 1.071765  | 3.204068  | -0.456838 |
| C                                                     | 4.956410       | 1.148294  | -0.485899 | C | -1.545490 | 2.670183  | 0.689177  |
| C                                                     | 4.594954       | 0.291478  | 1.828848  | C | -2.533477 | 1.581324  | 0.996684  |
| H                                                     | 4.684908       | -1.020287 | -2.161902 | C | -3.033041 | -0.692358 | 0.956451  |
| H                                                     | 3.400092       | -2.218745 | -1.965033 | H | -2.780796 | -3.029301 | -2.197371 |
| H                                                     | 2.995997       | -0.500060 | -2.011050 | C | -1.232053 | -2.210488 | -3.449444 |
| H                                                     | 4.712046       | -3.161447 | -0.121592 | C | -3.136679 | -0.927972 | -2.400064 |
| H                                                     | 5.920970       | -1.873383 | -0.031624 | H | -3.467687 | -2.678430 | 0.259047  |
|                                                       |                |           |           | H | -2.177713 | -2.563744 | 1.474635  |
|                                                       |                |           |           | H | -0.353262 | -3.761631 | 0.629256  |

|   |           |           |           |                                         |                |           |           |
|---|-----------|-----------|-----------|-----------------------------------------|----------------|-----------|-----------|
| C | -1.405953 | -4.852824 | -0.879589 | H                                       | 1.560218       | 3.589465  | -2.560503 |
| C | 0.893763  | -3.801850 | -1.096608 | H                                       | 2.961715       | 3.520016  | -1.469890 |
| H | -2.272029 | 1.991680  | -1.935889 | H                                       | 0.268308       | 5.201848  | -0.918140 |
| C | -0.701141 | 1.730535  | -3.364047 | H                                       | 0.194069       | 4.776655  | 0.806571  |
| C | -1.555498 | 3.934956  | -2.474918 | H                                       | 1.745422       | 5.191671  | 0.061103  |
| H | 1.630104  | 2.749824  | 0.374920  | C                                       | -4.663878      | 0.842785  | 1.826274  |
| C | 1.979355  | 3.071816  | -1.683375 | H                                       | -4.033274      | 2.912359  | 1.765353  |
| C | 0.790640  | 4.668763  | -0.111544 | H                                       | -4.953580      | -1.298246 | 1.703827  |
| H | -0.942130 | 2.851213  | 1.591789  | H                                       | -5.641488      | 1.050108  | 2.264240  |
| H | -2.063783 | 3.608167  | 0.444348  | <b>20</b>                               |                |           |           |
| C | -3.775950 | 1.874812  | 1.552697  | SCF energy in gas phase:                | -2865.86863335 |           |           |
| C | -4.285376 | -0.457016 | 1.519721  | Thermal correction to Enthalpy in gas   |                |           |           |
| H | -0.714287 | -3.179159 | -3.483514 | phase:                                  | 0.545416       |           |           |
| H | -1.794537 | -2.102328 | -4.390469 | Thermal correction to Gibbs Free Energy |                |           |           |
| H | -0.462731 | -1.423186 | -3.421788 | in gas phase:                           | 0.456848       |           |           |
| H | -3.884180 | -0.887260 | -1.593399 | SCF energy in solvent:                  | -2866.11337465 |           |           |
| H | -2.588501 | 0.023248  | -2.396011 | Co                                      | -0.000023      | -0.566115 | -0.170522 |
| H | -3.682259 | -1.005126 | -3.353812 | P                                       | 2.114887       | -0.461625 | -0.039496 |
| H | -1.524742 | -4.901071 | -1.973364 | P                                       | -2.114833      | -0.461544 | -0.039654 |
| H | -0.962463 | -5.809642 | -0.561337 | H                                       | -0.000386      | -2.082241 | 0.050713  |
| H | -2.409715 | -4.788212 | -0.431281 | N                                       | -0.000002      | 1.385837  | -0.385516 |
| H | 1.561338  | -3.019609 | -0.709371 | C                                       | 2.911940       | -0.563612 | 1.627720  |
| H | 1.337108  | -4.781847 | -0.856240 | C                                       | 2.439717       | 1.291767  | -0.529683 |
| H | 0.853289  | -3.721601 | -2.193417 | C                                       | 3.230394       | -1.451543 | -1.131515 |
| H | -0.439388 | 0.695470  | -3.103927 | C                                       | -2.912218      | -0.563023 | 1.627429  |
| H | -1.421846 | 1.710544  | -4.197290 | C                                       | -3.229927      | -1.452031 | -1.131521 |
| H | 0.210917  | 2.226803  | -3.725772 | C                                       | -2.439711      | 1.291696  | -0.530353 |
| H | -0.632282 | 4.445467  | -2.787393 | C                                       | -1.166025      | 2.083525  | -0.374401 |
| H | -2.271368 | 4.018550  | -3.308558 | C                                       | 1.166008       | 2.083571  | -0.373945 |
| H | -1.976574 | 4.487679  | -1.621888 | H                                       | 3.950028       | -0.199986 | 1.534729  |
| H | 2.149324  | 2.015632  | -1.937610 | C                                       | 2.928087       | -2.008957 | 2.131794  |

|   |           |           |           |                                         |                |           |           |
|---|-----------|-----------|-----------|-----------------------------------------|----------------|-----------|-----------|
| C | 2.162617  | 0.347588  | 2.604171  | H                                       | -1.910947      | -2.429732 | 2.123871  |
| H | 3.273396  | 1.770649  | 0.005340  | H                                       | -3.315203      | -2.049266 | 3.162896  |
| H | 2.705250  | 1.288449  | -1.599957 | H                                       | -3.567205      | -2.656338 | 1.513018  |
| H | 3.122606  | -2.474643 | -0.733344 | H                                       | -5.142398      | -1.147203 | -0.094248 |
| C | 2.668570  | -1.461381 | -2.556410 | H                                       | -4.856195      | -0.022728 | -1.444514 |
| C | 4.708157  | -1.059085 | -1.100904 | H                                       | -5.293027      | -1.711554 | -1.770067 |
| H | -3.950293 | -0.199442 | 1.534055  | H                                       | -2.741304      | -0.468051 | -3.028755 |
| C | -2.163167 | 0.348500  | 2.603793  | H                                       | -1.608219      | -1.757742 | -2.555268 |
| C | -2.928488 | -2.008190 | 2.132005  | H                                       | -3.232228      | -2.165891 | -3.188577 |
| H | -3.121811 | -2.475000 | -0.733104 | C                                       | -0.000086      | 4.178095  | -0.174253 |
| C | -4.707815 | -1.060026 | -1.101170 | H                                       | -2.154893      | 3.984858  | -0.225367 |
| C | -2.667940 | -1.461970 | -2.556354 | H                                       | 2.154756       | 3.984913  | -0.224346 |
| H | -2.705111 | 1.288229  | -1.600653 | H                                       | -0.000117      | 5.264015  | -0.068567 |
| H | -3.273467 | 1.770623  | 0.004515  |                                         |                |           |           |
| C | -1.193744 | 3.470554  | -0.253426 | PhBPin                                  |                |           |           |
| C | 1.193637  | 3.470576  | -0.252868 | SCF energy in gas phase:                | -642.972712553 |           |           |
| H | 3.566997  | -2.656860 | 1.512749  | Thermal correction to Enthalpy in gas   |                |           |           |
| H | 3.314522  | -2.050402 | 3.162777  | phase:                                  | 0.289602       |           |           |
| H | 1.910554  | -2.430508 | 2.123218  | Thermal correction to Gibbs Free Energy |                |           |           |
| H | 2.139721  | 1.395571  | 2.266494  | in gas phase:                           | 0.233969       |           |           |
| H | 1.119471  | 0.012817  | 2.712506  | SCF energy in solvent:                  | -642.985893393 |           |           |
| H | 2.641791  | 0.324854  | 3.595997  | B                                       | 0.122213       | 0.000186  | 0.000565  |
| H | 2.741833  | -0.467397 | -3.028689 | C                                       | 1.675542       | 0.000196  | 0.000627  |
| H | 3.233042  | -2.165127 | -3.188666 | O                                       | -0.637353      | 1.117115  | -0.225266 |
| H | 1.608898  | -1.757326 | -2.555498 | O                                       | -0.637327      | -1.116934 | 0.226154  |
| H | 5.142660  | -1.146456 | -0.093965 | C                                       | -2.004006      | 0.779429  | 0.080041  |
| H | 5.293635  | -1.710228 | -1.769945 | C                                       | -2.003773      | -0.779516 | -0.080182 |
| H | 4.856276  | -0.021641 | -1.443909 | C                                       | -2.923080      | 1.516134  | -0.876111 |
| H | -2.140024 | 1.396354  | 2.265736  | C                                       | -2.265023      | 1.232934  | 1.512717  |
| H | -2.642722 | 0.326191  | 3.595444  | C                                       | -2.263725      | -1.232978 | -1.513124 |
| H | -1.120097 | 0.013672  | 2.712681  | C                                       | -2.923459      | -1.516425 | 0.875218  |
|   |           |           |           | H                                       | -3.958953      | 1.205869  | -0.724086 |

|                                                                |           |           |           |   |           |           |           |
|----------------------------------------------------------------|-----------|-----------|-----------|---|-----------|-----------|-----------|
| H                                                              | -2.859105 | 2.588958  | -0.692458 | B | 1.961112  | -0.110829 | -0.334209 |
| H                                                              | -2.651552 | 1.332269  | -1.913717 | C | 1.206393  | -1.301299 | -1.278005 |
| H                                                              | -2.054974 | 2.299969  | 1.587232  | H | 0.920630  | 1.079904  | -0.863897 |
| H                                                              | -3.303104 | 1.063599  | 1.801325  | N | -1.946283 | 0.191603  | -1.292999 |
| H                                                              | -1.617299 | 0.709536  | 2.217238  | O | 3.014866  | 0.592172  | -1.015042 |
| H                                                              | -2.053534 | -2.299997 | -1.587503 | O | 2.526754  | -0.601697 | 0.884160  |
| H                                                              | -3.301596 | -1.063709 | -1.802541 | C | 4.246505  | 0.314671  | -0.369918 |
| H                                                              | -1.615510 | -0.709553 | -2.217175 | C | 3.785901  | 0.015943  | 1.090676  |
| H                                                              | -3.959252 | -1.206321 | 0.722359  | C | 5.164455  | 1.518132  | -0.512417 |
| H                                                              | -2.859163 | -2.589232 | 0.691587  | C | 4.882288  | -0.901441 | -1.044537 |
| H                                                              | -2.652811 | -1.332549 | 1.913060  | C | 3.562052  | 1.292179  | 1.902468  |
| C                                                              | 2.390850  | -1.187942 | 0.160949  | C | 4.684596  | -0.935209 | 1.863141  |
| C                                                              | 2.390977  | 1.188169  | -0.160171 | H | 6.080938  | 1.378875  | 0.066035  |
| C                                                              | 3.776451  | -1.190891 | 0.161157  | H | 5.439640  | 1.647499  | -1.560286 |
| H                                                              | 1.849698  | -2.118325 | 0.286293  | H | 4.673696  | 2.430511  | -0.176992 |
| C                                                              | 3.776588  | 1.190815  | -0.161458 | H | 4.980028  | -0.695635 | -2.111117 |
| H                                                              | 1.849958  | 2.118711  | -0.284916 | H | 5.873023  | -1.118201 | -0.640304 |
| C                                                              | 4.470099  | -0.000117 | -0.000477 | H | 4.254730  | -1.785744 | -0.929591 |
| H                                                              | 4.317705  | -2.120445 | 0.286648  | H | 3.017346  | 1.035800  | 2.812008  |
| H                                                              | 4.317934  | 2.120258  | -0.287373 | H | 4.503078  | 1.770817  | 2.180092  |
| H                                                              | 5.553296  | -0.000256 | -0.001016 | H | 2.960090  | 2.002961  | 1.335745  |
| <b>TS<sub>13-20</sub></b>                                      |           |           |           | H | 5.696297  | -0.531671 | 1.949842  |
| SCF energy in gas phase: -3508.81440183                        |           |           |           | H | 4.288342  | -1.078948 | 2.869853  |
| Thermal correction to Enthalpy in gas phase: 0.83745           |           |           |           | H | 4.736984  | -1.908417 | 1.377309  |
| Thermal correction to Gibbs Free Energy in gas phase: 0.721102 |           |           |           | C | 1.488828  | -2.631754 | -0.952156 |
| SCF energy in solvent: -3509.06266645                          |           |           |           | C | 0.684028  | -1.060681 | -2.552946 |
| Co                                                             | -0.025007 | 0.181771  | -0.204091 | C | 1.219749  | -3.672491 | -1.825026 |
| P                                                              | -0.647078 | 2.236923  | 0.091772  | H | 1.955210  | -2.835752 | 0.003855  |
| P                                                              | -1.234023 | -1.440095 | 0.941295  | C | 0.362566  | -2.097623 | -3.418545 |
|                                                                |           |           |           | H | 0.532374  | -0.038509 | -2.874922 |
|                                                                |           |           |           | C | 0.627747  | -3.407973 | -3.053606 |

|   |           |           |           |                                       |                |           |           |
|---|-----------|-----------|-----------|---------------------------------------|----------------|-----------|-----------|
| H | 1.466608  | -4.691072 | -1.549737 | H                                     | -1.452451      | 1.634985  | 2.891206  |
| H | -0.073371 | -1.880624 | -4.386169 | H                                     | -3.794580      | 2.882901  | -0.024217 |
| H | 0.398538  | -4.219951 | -3.733321 | H                                     | -3.458179      | 1.329308  | 0.738117  |
| C | -1.983900 | 2.922586  | 1.204479  | H                                     | -4.081526      | 2.675342  | 1.712737  |
| C | -1.424006 | 2.511258  | -1.582537 | H                                     | 1.154094       | 3.899308  | -1.884687 |
| C | 0.647385  | 3.583462  | 0.219954  | H                                     | 2.442867       | 4.304975  | -0.741412 |
| C | -2.539971 | -0.916125 | 2.159833  | H                                     | 2.112500       | 2.601620  | -1.113462 |
| C | -0.536729 | -3.045422 | 1.562188  | H                                     | -0.394318      | 5.147964  | 1.386858  |
| C | -2.203333 | -2.062712 | -0.525874 | H                                     | 0.963133       | 5.715867  | 0.407370  |
| C | -2.724918 | -0.894260 | -1.317690 | H                                     | -0.571505      | 5.308178  | -0.380276 |
| C | -2.328688 | 1.337670  | -1.864682 | H                                     | -0.989847      | -0.448667 | 3.639789  |
| H | -2.013142 | 4.006436  | 1.024842  | H                                     | -2.659104      | -0.307573 | 4.241054  |
| C | -1.578508 | 2.702562  | 2.664183  | H                                     | -1.928975      | -1.909628 | 4.019386  |
| C | -3.397901 | 2.415351  | 0.888448  | H                                     | -3.858391      | -2.675423 | 2.277084  |
| H | -1.963038 | 3.465705  | -1.677760 | H                                     | -4.587055      | -1.152811 | 2.826037  |
| H | -0.593928 | 2.512992  | -2.304662 | H                                     | -4.377422      | -1.451783 | 1.092588  |
| H | 1.203615  | 3.290428  | 1.126848  | H                                     | 1.312596       | -2.055456 | 2.187832  |
| C | 1.640754  | 3.578548  | -0.948978 | H                                     | 0.251018       | -2.523953 | 3.542188  |
| C | 0.119165  | 5.008847  | 0.425632  | H                                     | 1.175291       | -3.767646 | 2.682906  |
| H | -2.687520 | 0.133010  | 1.879079  | H                                     | -1.997769      | -3.804073 | 3.017333  |
| C | -1.993566 | -0.898413 | 3.591742  | H                                     | -2.333208      | -4.298688 | 1.340617  |
| C | -3.908811 | -1.595440 | 2.078057  | H                                     | -1.002346      | -5.046621 | 2.244241  |
| H | -0.094042 | -3.446390 | 0.638940  | C                                     | -4.327514      | 0.281554  | -2.656939 |
| C | 0.616052  | -2.826713 | 2.549637  | H                                     | -4.577271      | -1.771336 | -2.004575 |
| C | -1.530562 | -4.096071 | 2.065356  | H                                     | -3.819561      | 2.350366  | -3.058252 |
| H | -1.457337 | -2.601085 | -1.134813 | H                                     | -5.270990      | 0.315169  | -3.204934 |
| H | -3.007899 | -2.769086 | -0.280451 | <b>21</b>                             |                |           |           |
| C | -3.943050 | -0.884168 | -1.997894 | SCF energy in gas phase:              | -3688.53305402 |           |           |
| C | -3.519305 | 1.414041  | -2.586654 | Thermal correction to Enthalpy in gas |                |           |           |
| H | -0.619830 | 3.193766  | 2.894491  | phase:                                | 0.935489       |           |           |
| H | -2.337098 | 3.114874  | 3.348762  |                                       |                |           |           |

|                                         |   |           |           |           |
|-----------------------------------------|---|-----------|-----------|-----------|
| Thermal correction to Gibbs Free Energy | H | 0.635546  | -4.901228 | -2.422137 |
| in gas phase: 0.808896                  | H | 2.296397  | -3.119435 | -4.150961 |
| SCF energy in solvent: -3688.77800161   | H | 2.025589  | -1.408956 | -4.508286 |
| Co -0.501167 0.378305 0.315540          | H | 3.172141  | -1.867775 | -3.250127 |
| P -0.945202 2.118300 -0.946314          | H | -1.085748 | -2.197427 | -2.717419 |
| P -1.187298 -0.811398 2.014813          | H | -0.370835 | -1.392173 | -4.115729 |
| B 0.819887 -0.900978 -0.716604          | H | -0.299113 | -3.154025 | -3.979360 |
| H 0.504037 1.146211 1.181378            | H | 5.682241  | 0.006845  | 1.818754  |
| B 1.524803 0.438753 0.467062            | H | 4.564243  | -0.977082 | 2.773349  |
| N -1.957806 -0.528262 -0.683816         | H | 4.751766  | -1.291774 | 1.047507  |
| O 0.802074 -2.251347 -0.378191          | H | 3.203800  | 0.857421  | 3.597854  |
| O 1.094141 -0.779428 -2.072955          | H | 4.348510  | 2.000482  | 2.884554  |
| O 2.375394 -0.254005 1.378685           | H | 2.616825  | 2.134492  | 2.526239  |
| O 2.331533 1.418276 -0.181372           | H | 4.179225  | 0.866172  | -1.901364 |
| C 1.244298 -3.047463 -1.478211          | H | 5.402122  | 0.231342  | -0.783164 |
| C 1.085779 -2.069079 -2.696068          | H | 3.852521  | -0.606950 | -0.997380 |
| C 3.588757 0.471450 1.522645            | H | 5.418909  | 2.460359  | 0.572823  |
| C 3.692630 1.220040 0.154817            | H | 4.421067  | 3.011941  | -0.778692 |
| C 2.688447 -3.447316 -1.192240          | H | 3.864394  | 3.258605  | 0.876178  |
| C 0.379270 -4.296871 -1.549505          | C | -2.249205 | 3.371085  | -0.502965 |
| C 2.218408 -2.124270 -3.707682          | C | -1.698207 | 1.199634  | -2.357069 |
| C -0.250770 -2.220710 -3.416274         | C | 0.363254  | 3.087944  | -1.829111 |
| C 4.717782 -0.506367 1.800971           | C | -2.532820 | -0.290626 | 3.196341  |
| C 3.434667 1.432950 2.701202            | C | 0.035105  | -1.692805 | 3.084259  |
| C 4.331178 0.369558 -0.942453           | C | -1.935882 | -2.203823 | 1.067641  |
| C 4.391157 2.569483 0.218349            | C | -2.517104 | -1.662920 | -0.202672 |
| H 2.721118 -3.981955 -0.242629          | C | -2.415628 | -0.010270 | -1.844391 |
| H 3.090464 -4.095892 -1.972236          | H | -2.317239 | 4.106655  | -1.322402 |
| H 3.329358 -2.571923 -1.099878          | C | -1.878363 | 4.094647  | 0.795940  |
| H 0.545980 -4.902831 -0.657718          | C | -3.609320 | 2.686914  | -0.341792 |
| H -0.680200 -4.047823 -1.597664         | H | -2.339498 | 1.794315  | -3.022550 |

H -0.829478 0.845401 -2.937758  
 H 1.089668 2.294549 -2.066731  
 C 1.072711 4.088034 -0.910771  
 C -0.081628 3.771091 -3.124770  
 H -2.520087 -0.987270 4.051592  
 C -2.260999 1.128125 3.705458  
 C -3.917379 -0.349139 2.544091  
 H 0.819194 -1.956232 2.356677  
 C 0.657669 -0.737023 4.104209  
 C -0.472653 -2.967534 3.760848  
 H -1.071504 -2.829719 0.796154  
 H -2.660871 -2.823501 1.611851  
 C -3.571185 -2.290822 -0.860964  
 C -3.477603 -0.588366 -2.535300  
 H -2.692976 4.769746 1.103837  
 H -1.711184 3.365128 1.603320  
 H -0.964055 4.693534 0.702005  
 H -3.538819 1.870687 0.395099  
 H -4.359414 3.406334 0.022448  
 H -3.987429 2.261653 -1.283161  
 H 1.281244 3.655723 0.076865  
 H 2.038854 4.377174 -1.352831  
 H 0.479467 5.008238 -0.788733  
 H 0.775993 4.286853 -3.586430  
 H -0.471708 3.061374 -3.868690  
 H -0.856295 4.533921 -2.943505  
 H -1.258659 1.238674 4.141267  
 H -2.336880 1.843504 2.873034  
 H -3.000132 1.410418 4.472516  
 H -3.933567 0.219530 1.600271  
 H -4.239831 -1.376716 2.322774

H -4.671637 0.097504 3.211140  
 H -0.039615 -0.518111 4.929327  
 H 1.559373 -1.190649 4.544868  
 H 0.956592 0.209090 3.632302  
 H 0.338757 -3.429198 4.346495  
 H -1.299883 -2.763753 4.460405  
 H -0.819150 -3.718701 3.036053  
 C -4.067203 -1.743779 -2.038723  
 H -3.999300 -3.198274 -0.435197  
 H -3.825385 -0.128330 -3.460118  
 H -4.900805 -2.213586 -2.562924

**TS<sub>21-22</sub>**

SCF energy in gas phase: -3688.51970618

Thermal correction to Enthalpy in gas phase: 0.932539

Thermal correction to Gibbs Free Energy in gas phase: 0.804684

SCF energy in solvent: -3688.7647234

Co -0.501890 -0.003111 -0.361623  
 P -0.669683 -1.847031 -1.486187  
 P -1.347204 1.955646 0.058704  
 B 0.672434 -0.390855 1.226654  
 H -0.196601 0.616856 -1.701227  
 B 1.322109 0.479113 -0.765021  
 N -2.126264 -0.691792 0.611798  
 O 0.312597 0.135382 2.478689  
 O 1.682393 -1.329933 1.446608  
 O 1.939007 1.721938 -0.530529  
 O 2.216731 -0.306188 -1.511811  
 C 1.224528 -0.322156 3.480793  
 C 1.766179 -1.632112 2.839199

|   |           |           |           |   |           |           |           |
|---|-----------|-----------|-----------|---|-----------|-----------|-----------|
| C | 3.098341  | 1.829511  | -1.351459 | H | 5.092342  | 0.577121  | -2.983971 |
| C | 3.487898  | 0.332843  | -1.552651 | H | 4.391871  | -1.045062 | -2.928042 |
| C | 2.305543  | 0.743043  | 3.648078  | H | 3.509107  | 0.263588  | -3.718690 |
| C | 0.473436  | -0.510399 | 4.786934  | C | -1.821215 | -1.825750 | -2.944482 |
| C | 3.201728  | -1.979892 | 3.188608  | C | -1.574052 | -2.886588 | -0.271051 |
| C | 0.858709  | -2.835906 | 3.092124  | C | 0.710080  | -2.924585 | -2.099119 |
| C | 4.137385  | 2.672744  | -0.634258 | C | -2.553561 | 2.478201  | -1.261618 |
| C | 2.676044  | 2.510069  | -2.652679 | C | -0.442467 | 3.496027  | 0.546975  |
| C | 4.326711  | -0.220935 | -0.402473 | C | -2.379366 | 1.547279  | 1.516977  |
| C | 4.158487  | 0.019782  | -2.879274 | C | -2.871204 | 0.135998  | 1.381360  |
| H | 1.833588  | 1.687835  | 3.918370  | C | -2.473026 | -1.998271 | 0.542851  |
| H | 3.016871  | 0.475260  | 4.431188  | H | -1.924723 | -2.866982 | -3.288186 |
| H | 2.849774  | 0.895807  | 2.714498  | C | -1.216377 | -0.987000 | -4.072415 |
| H | 0.137644  | 0.458414  | 5.159992  | C | -3.216853 | -1.321935 | -2.573660 |
| H | -0.402268 | -1.143355 | 4.652430  | H | -2.128970 | -3.733047 | -0.700984 |
| H | 1.119157  | -0.960072 | 5.544892  | H | -0.799971 | -3.293429 | 0.400113  |
| H | 3.314186  | -2.126168 | 4.265408  | H | 1.316232  | -2.219122 | -2.688211 |
| H | 3.486835  | -2.905596 | 2.686752  | C | 0.290061  | -4.099129 | -2.988811 |
| H | 3.888057  | -1.198251 | 2.867838  | C | 1.593769  | -3.416035 | -0.950186 |
| H | -0.180752 | -2.593001 | 2.862341  | H | -2.837671 | 1.495908  | -1.666703 |
| H | 1.172107  | -3.650544 | 2.437628  | C | -3.850562 | 3.175350  | -0.842073 |
| H | 0.916927  | -3.179941 | 4.126162  | C | -1.817727 | 3.212125  | -2.386408 |
| H | 5.074635  | 2.694383  | -1.195161 | H | 0.199995  | 3.686469  | -0.328217 |
| H | 3.775543  | 3.697528  | -0.535933 | C | -1.318480 | 4.725845  | 0.807256  |
| H | 4.336118  | 2.286939  | 0.364318  | C | 0.487610  | 3.253165  | 1.738197  |
| H | 2.224826  | 3.474212  | -2.412873 | H | -1.670267 | 1.556463  | 2.360579  |
| H | 3.524269  | 2.682158  | -3.317443 | H | -3.197430 | 2.245135  | 1.737761  |
| H | 1.932724  | 1.909181  | -3.179336 | C | -4.010182 | -0.307286 | 2.048578  |
| H | 4.374153  | -1.306300 | -0.497435 | C | -3.592790 | -2.498595 | 1.200434  |
| H | 5.342853  | 0.177753  | -0.413805 | H | -1.872096 | -0.999562 | -4.957351 |
| H | 3.862311  | 0.001124  | 0.558206  | H | -1.092632 | 0.057675  | -3.745289 |

H -0.226297 -1.356388 -4.381490  
H -3.163863 -0.329171 -2.104443  
H -3.842580 -1.240647 -3.476486  
H -3.732188 -1.995154 -1.872620  
H -0.145199 -3.781527 -3.946675  
H 1.173845 -4.713973 -3.222622  
H -0.437157 -4.756913 -2.483719  
H 2.523183 -3.842401 -1.359882  
H 1.855444 -2.607818 -0.258091  
H 1.095750 -4.219249 -0.379846  
H -4.434101 2.557524 -0.142959  
H -3.685403 4.153554 -0.370386  
H -4.482604 3.341368 -1.729754  
H -1.536766 4.236741 -2.097138  
H -0.899358 2.674382 -2.671076  
H -2.457774 3.285250 -3.279463  
H -2.062583 4.536031 1.597934  
H -0.686923 5.560920 1.150368  
H -1.852937 5.068997 -0.087735  
H 1.118345 4.142899 1.893039  
H -0.079516 3.082328 2.667137  
H 1.139785 2.393172 1.565906  
C -4.385150 -1.641695 1.955409  
H -4.588488 0.401165 2.642020  
H -3.836734 -3.557025 1.106345  
H -5.275964 -2.009285 2.466743

**22**

SCF energy in gas phase: -3688.53805915  
Thermal correction to Enthalpy in gas  
phase: 0.935129

Thermal correction to Gibbs Free Energy  
in gas phase: 0.808771

SCF energy in solvent: -3688.78214262

Co -0.352972 -0.541848 0.000346  
P -0.412861 -0.911276 2.124856  
P -0.637518 -0.823827 -2.110210  
B -0.221657 1.458545 -0.051697  
H -0.282731 -2.049026 -0.028454  
B 1.556276 -0.529074 -0.077776  
N -2.401451 -0.481447 0.110042  
O -1.345144 2.236244 -0.378165  
O 0.823799 2.335478 0.237067  
O 2.343069 -0.549372 -1.236995  
O 2.417396 -0.541315 1.026828  
C -1.132882 3.602648 -0.028834  
C 0.431676 3.701459 0.099467  
C 3.709004 -0.775247 -0.888574  
C 3.754768 -0.291621 0.594964  
C -1.870788 3.838709 1.288187  
C -1.739984 4.486302 -1.107549  
C 0.921732 4.469777 1.320394  
C 1.125126 4.271901 -1.135032  
C 4.596067 0.005026 -1.842774  
C 3.976116 -2.271932 -1.031070  
C 4.007684 1.208605 0.726142  
C 4.713741 -1.059472 1.488458  
H -1.792019 4.873881 1.624406  
H -2.924957 3.598443 1.143932  
H -1.483016 3.187499 2.071705  
H -2.818720 4.326743 -1.141009  
H -1.558225 5.542664 -0.897924

|   |           |           |           |   |           |           |           |
|---|-----------|-----------|-----------|---|-----------|-----------|-----------|
| H | -1.332842 | 4.253136  | -2.090065 | H | -2.083750 | 0.665068  | 2.765553  |
| H | 2.012061  | 4.442343  | 1.346072  | H | 1.515171  | -0.655758 | 3.462705  |
| H | 0.608215  | 5.515063  | 1.273999  | C | 0.845636  | 1.355448  | 3.227716  |
| H | 0.555367  | 4.036427  | 2.248059  | C | -0.062224 | -0.281635 | 4.892485  |
| H | 0.927249  | 5.339758  | -1.243911 | H | -0.880565 | -2.498486 | -3.831272 |
| H | 2.201410  | 4.131861  | -1.024106 | C | 0.658704  | -3.256433 | -2.534131 |
| H | 0.815354  | 3.767478  | -2.045925 | C | -1.825211 | -3.377908 | -2.121931 |
| H | 5.645534  | -0.070467 | -1.548834 | H | 1.161235  | -0.564664 | -3.621679 |
| H | 4.495778  | -0.400484 | -2.850943 | C | -0.530396 | 0.014507  | -4.834901 |
| H | 4.314511  | 1.056320  | -1.870183 | C | 0.642204  | 1.449173  | -3.142732 |
| H | 3.744484  | -2.576657 | -2.052140 | H | -2.294948 | 0.850524  | -2.441241 |
| H | 5.019122  | -2.518946 | -0.825881 | H | -2.906158 | -0.662286 | -3.161256 |
| H | 3.338878  | -2.845046 | -0.355902 | C | -4.521087 | -0.560764 | -0.988516 |
| H | 3.301529  | 1.774896  | 0.118658  | C | -4.405061 | -0.646590 | 1.400194  |
| H | 3.851292  | 1.498821  | 1.766188  | H | 1.094326  | -3.347690 | 1.172725  |
| H | 5.028723  | 1.471943  | 0.443895  | H | 1.856147  | -2.752537 | 2.658412  |
| H | 5.741027  | -0.963990 | 1.129144  | H | 1.058540  | -4.348250 | 2.653691  |
| H | 4.670684  | -0.654946 | 2.500990  | H | -1.416328 | -4.560792 | 2.449142  |
| H | 4.456008  | -2.116389 | 1.534024  | H | -2.486988 | -3.144808 | 2.464580  |
| C | -0.342463 | -2.689285 | 2.661240  | H | -1.511063 | -3.503436 | 1.019096  |
| C | -2.143175 | -0.408743 | 2.516804  | H | 1.343504  | 1.501345  | 2.264375  |
| C | 0.555226  | -0.117390 | 3.498217  | H | -0.085841 | 1.946564  | 3.219307  |
| C | -0.690395 | -2.566117 | -2.748149 | H | 1.480373  | 1.766317  | 4.029398  |
| C | 0.237896  | 0.024632  | -3.508105 | H | -0.271338 | -1.325434 | 5.164793  |
| C | -2.374399 | -0.240312 | -2.297323 | H | 0.628492  | 0.119690  | 5.650912  |
| C | -3.132170 | -0.450250 | -1.017412 | H | -1.002344 | 0.286385  | 4.982828  |
| C | -3.019532 | -0.533509 | 1.301641  | H | 1.486696  | -2.705756 | -3.002864 |
| H | -0.416315 | -2.687191 | 3.759814  | H | 0.881136  | -3.330586 | -1.459006 |
| C | 0.997724  | -3.318210 | 2.268699  | H | 0.637499  | -4.271944 | -2.959698 |
| C | -1.509931 | -3.514445 | 2.118284  | H | -2.818354 | -2.969028 | -2.361397 |
| H | -2.578388 | -0.921957 | 3.385846  | H | -1.795939 | -4.414755 | -2.492157 |

|                                                                |           |           |           |   |           |           |           |
|----------------------------------------------------------------|-----------|-----------|-----------|---|-----------|-----------|-----------|
| H                                                              | -1.721929 | -3.403442 | -1.027555 | C | -3.838317 | -0.458109 | -0.613285 |
| H                                                              | -0.849023 | -0.989152 | -5.150282 | C | -3.732685 | 0.710036  | 0.412580  |
| H                                                              | -1.426741 | 0.653042  | -4.781128 | C | 2.310364  | 0.211006  | 4.356140  |
| H                                                              | 0.106952  | 0.420755  | -5.636135 | C | 2.726843  | -1.831622 | 3.008238  |
| H                                                              | -0.244461 | 2.067254  | -2.927784 | C | -0.519010 | -0.263865 | 4.442342  |
| H                                                              | 1.292403  | 1.459771  | -2.260292 | C | 0.102853  | -2.594093 | 3.871502  |
| H                                                              | 1.182378  | 1.916480  | -3.981613 | C | -4.686899 | -1.633443 | -0.160952 |
| C                                                              | -5.165536 | -0.677020 | 0.237158  | C | -4.280465 | 0.006868  | -1.999067 |
| H                                                              | -5.082765 | -0.551687 | -1.922776 | C | -3.757831 | 0.229506  | 1.862751  |
| H                                                              | -4.873482 | -0.706236 | 2.382811  | C | -4.737596 | 1.830651  | 0.214101  |
| H                                                              | -6.251249 | -0.775537 | 0.286401  | H | 2.333097  | -0.318723 | 5.311024  |
| <b>TS<sub>22-23</sub></b>                                      |           |           |           | H | 3.330932  | 0.504152  | 4.105761  |
| SCF energy in gas phase: -3688.53239341                        |           |           |           | H | 1.717943  | 1.116297  | 4.476532  |
| Thermal correction to Enthalpy in gas phase: 0.93366           |           |           |           | H | 3.694929  | -1.417182 | 2.724451  |
| Thermal correction to Gibbs Free Energy in gas phase: 0.807998 |           |           |           | H | 2.860098  | -2.448775 | 3.898323  |
| SCF energy in solvent: -3688.77778608                          |           |           |           | H | 2.387783  | -2.469302 | 2.191541  |
| Co                                                             | 0.272651  | 0.220201  | -0.600573 | H | -1.571506 | -0.545818 | 4.391493  |
| P                                                              | 0.354092  | 2.347209  | -0.329107 | H | -0.173842 | -0.401175 | 5.468652  |
| P                                                              | 0.430499  | -1.837287 | -1.257231 | H | -0.444494 | 0.790735  | 4.188114  |
| B                                                              | 0.521800  | -0.222724 | 1.328118  | H | 0.571944  | -2.787346 | 4.838726  |
| H                                                              | -0.148458 | 0.519480  | -2.021646 | H | -0.959545 | -2.826747 | 3.954864  |
| B                                                              | -1.624600 | 0.173038  | -0.364521 | H | 0.535023  | -3.268865 | 3.134281  |
| N                                                              | 2.279850  | 0.373396  | -0.995438 | H | -5.717331 | -1.320486 | 0.022987  |
| O                                                              | 1.692797  | 0.076103  | 2.041714  | H | -4.697985 | -2.398932 | -0.938504 |
| O                                                              | -0.308674 | -0.965231 | 2.169754  | H | -4.288754 | -2.080801 | 0.748081  |
| O                                                              | -2.479476 | -0.878258 | -0.718682 | H | -4.126674 | -0.808267 | -2.707585 |
| O                                                              | -2.420178 | 1.206475  | 0.153647  | H | -5.335529 | 0.285778  | -2.017144 |
| C                                                              | 1.755640  | -0.676777 | 3.252403  | H | -3.684832 | 0.858943  | -2.329647 |
| C                                                              | 0.265660  | -1.135286 | 3.465480  | H | -3.015997 | -0.554808 | 2.022651  |
|                                                                |           |           |           | H | -3.500103 | 1.067077  | 2.512798  |
|                                                                |           |           |           | H | -4.743503 | -0.139686 | 2.151478  |

|   |           |           |           |                                       |                |           |           |
|---|-----------|-----------|-----------|---------------------------------------|----------------|-----------|-----------|
| H | -5.759501 | 1.458181  | 0.316240  | H                                     | -1.596394      | 3.901271  | -3.163145 |
| H | -4.580863 | 2.601058  | 0.970855  | H                                     | 0.771182       | 3.653015  | -3.860941 |
| H | -4.630090 | 2.290992  | -0.766827 | H                                     | 2.064275       | 3.297322  | -2.698169 |
| C | 0.041912  | 3.386067  | -1.835394 | H                                     | 0.966705       | 1.995357  | -3.229144 |
| C | 2.149613  | 2.577874  | -0.001486 | H                                     | -1.095343      | 1.686678  | 2.185250  |
| C | -0.439469 | 3.378439  | 0.991807  | H                                     | 0.446011       | 2.396566  | 2.728052  |
| C | -0.526616 | -2.376044 | -2.758115 | H                                     | -1.085173      | 3.244683  | 3.055794  |
| C | 0.309812  | -3.237970 | -0.029020 | H                                     | 0.324356       | 5.329969  | 0.281115  |
| C | 2.200722  | -1.930334 | -1.796386 | H                                     | -0.379207      | 5.343055  | 1.907039  |
| C | 2.938108  | -0.634741 | -1.585885 | H                                     | 1.225083       | 4.637296  | 1.651297  |
| C | 2.932351  | 1.519523  | -0.722449 | H                                     | -0.401041      | -0.407394 | -3.704304 |
| H | 0.197930  | 4.435060  | -1.535694 | H                                     | 0.754516       | -1.594641 | -4.359004 |
| C | -1.403520 | 3.224785  | -2.315867 | H                                     | -0.964261      | -1.722084 | -4.774574 |
| C | 1.022842  | 3.063068  | -2.965534 | H                                     | -0.770935      | -4.535630 | -2.430521 |
| H | 2.528084  | 3.584305  | -0.228082 | H                                     | -0.881529      | -4.022351 | -4.120079 |
| H | 2.269265  | 2.395643  | 1.079428  | H                                     | 0.704157       | -4.105938 | -3.330800 |
| H | -1.461191 | 3.530173  | 0.612163  | H                                     | -1.630310      | -2.575723 | 0.716794  |
| C | -0.549220 | 2.627950  | 2.316372  | H                                     | -1.730407      | -3.924574 | -0.437652 |
| C | 0.223140  | 4.744133  | 1.205818  | H                                     | -1.159102      | -4.220595 | 1.221190  |
| H | -1.565844 | -2.212913 | -2.432787 | H                                     | 0.527367       | -5.194831 | -1.022149 |
| C | -0.266898 | -1.465159 | -3.961718 | H                                     | 2.080044       | -4.433943 | -0.630398 |
| C | -0.354209 | -3.840640 | -3.170087 | H                                     | 1.085765       | -5.129358 | 0.654096  |
| H | 0.804047  | -2.766335 | 0.833914  | C                                     | 4.947009       | 0.676070  | -1.716770 |
| C | -1.140276 | -3.498426 | 0.389265  | H                                     | 4.772163       | -1.349746 | -2.457382 |
| C | 1.042436  | -4.560717 | -0.289466 | H                                     | 4.758218       | 2.649801  | -0.845725 |
| H | 2.727162  | -2.708005 | -1.226028 | H                                     | 5.990858       | 0.797778  | -2.010702 |
| H | 2.268734  | -2.232674 | -2.851991 | <b>23</b>                             |                |           |           |
| C | 4.274282  | -0.511864 | -1.968294 | SCF energy in gas phase:              | -3688.53917086 |           |           |
| C | 4.266483  | 1.704395  | -1.075466 | Thermal correction to Enthalpy in gas |                |           |           |
| H | -1.574190 | 2.189938  | -2.649850 | phase:                                | 0.935194       |           |           |
| H | -2.137247 | 3.443030  | -1.526693 |                                       |                |           |           |

|                                         |   |           |           |           |
|-----------------------------------------|---|-----------|-----------|-----------|
| Thermal correction to Gibbs Free Energy | H | -2.239378 | 2.154384  | -3.312485 |
| in gas phase: 0.808561                  | H | 2.094049  | 3.947100  | -1.842768 |
| SCF energy in solvent: -3688.78341302   | H | 0.761523  | 5.104750  | -1.933797 |
| Co -0.311375 -0.583344 0.320058         | H | 1.065541  | 4.202459  | -0.438753 |
| P -0.708753 0.283179 2.241503           | H | 0.051061  | 3.759676  | -4.064264 |
| P -0.236894 -1.954648 -1.335500         | H | 1.427899  | 2.698511  | -3.734991 |
| B -0.375614 1.172468 -0.666542          | H | -0.178437 | 2.008010  | -3.923224 |
| H -0.033177 -1.881381 1.048606          | H | 5.714634  | -0.000635 | -1.022413 |
| B 1.583484 -0.314261 0.357246           | H | 4.763194  | -1.115818 | -2.011081 |
| N -2.332291 -0.870425 0.299574          | H | 4.289148  | 0.580560  | -1.905775 |
| O -1.526027 1.972248 -0.746584          | H | 4.169452  | -2.710046 | -0.254214 |
| O 0.621553 1.801771 -1.411369           | H | 5.334360  | -1.867436 | 0.780011  |
| O 2.485059 -0.784796 -0.604377          | H | 3.680209  | -2.158609 | 1.349235  |
| O 2.321687 0.337864 1.354358            | H | 3.005729  | 2.002503  | -0.573727 |
| C -1.339858 3.122910 -1.572658          | H | 3.409374  | 2.676190  | 1.006129  |
| C 0.173753 3.010218 -2.025026           | H | 4.709826  | 2.188633  | -0.090053 |
| C 3.824310 -0.596739 -0.151259          | H | 5.645811  | 0.550961  | 1.742978  |
| C 3.657104 0.550273 0.893343            | H | 4.413075  | 1.321252  | 2.748000  |
| C -1.663306 4.364607 -0.746772          | H | 4.479644  | -0.439176 | 2.639230  |
| C -2.354137 3.053135 -2.712460          | C | -0.831384 | -0.905580 | 3.661483  |
| C 1.068593 4.140294 -1.525447           | C | -2.448827 | 0.849414  | 2.002531  |
| C 0.369108 2.862276 -3.530458           | C | 0.141456  | 1.726480  | 3.027183  |
| C 4.701674 -0.254996 -1.343117          | C | 0.944102  | -3.388952 | -1.387059 |
| C 4.286541 -1.909291 0.477511           | C | -0.285020 | -1.446143 | -3.117857 |
| C 3.706449 1.938349 0.259145            | C | -1.885011 | -2.765420 | -1.134155 |
| C 4.607484 0.483784 2.076029            | C | -2.862476 | -1.823761 | -0.485619 |
| H -1.600479 5.268825 -1.355023          | C | -3.132801 | -0.096708 | 1.052318  |
| H -2.684128 4.279860 -0.370762          | H | -1.221714 | -0.336880 | 4.520804  |
| H -0.997196 4.479126 0.103742           | C | 0.557474  | -1.448610 | 4.011158  |
| H -3.358175 3.043222 -2.286174          | C | -1.804946 | -2.053443 | 3.381798  |
| H -2.270371 3.920393 -3.369849          | H | -3.024569 | 0.950881  | 2.934037  |

H -2.383331 1.836202 1.519184  
H 1.128130 1.316987 3.289879  
C 0.376328 2.854691 2.026058  
C -0.538843 2.262353 4.290994  
H 1.875536 -2.919924 -1.739132  
C 1.228961 -3.982943 -0.007132  
C 0.543492 -4.498940 -2.366360  
H -0.418380 -2.363624 -3.712887  
C -1.498460 -0.552092 -3.378544  
C 1.026179 -0.774279 -3.536707  
H -2.288607 -3.194986 -2.061780  
H -1.722293 -3.597700 -0.428498  
C -4.241383 -1.967708 -0.619892  
C -4.520546 -0.197380 0.970325  
H 0.986006 -1.974775 3.144116  
H 1.259742 -0.653060 4.300155  
H 0.487651 -2.158171 4.850504  
H -1.821625 -2.743853 4.239831  
H -2.835163 -1.701227 3.221224  
H -1.489906 -2.616341 2.489982  
H 0.905734 2.492164 1.137164  
H -0.575798 3.305000 1.710009  
H 0.982838 3.648249 2.490705  
H -0.606183 1.515034 5.093515  
H 0.036393 3.113657 4.688249  
H -1.556273 2.629700 4.079625  
H 1.619662 -3.226880 0.682238  
H 0.321530 -4.410262 0.450775  
H 1.968495 -4.794470 -0.100916  
H 0.436157 -4.145075 -3.400695  
H 1.315169 -5.284706 -2.371768

H -0.403379 -4.979720 -2.070823  
H -2.448856 -1.096088 -3.269278  
H -1.527375 0.293868 -2.679279  
H -1.465055 -0.152293 -4.405099  
H 1.240836 0.096150 -2.901862  
H 1.880937 -1.461369 -3.456903  
H 0.958736 -0.440806 -4.585166  
C -5.081510 -1.129969 0.106168  
H -4.643812 -2.739874 -1.275883  
H -5.145689 0.453003 1.582314  
H -6.165375 -1.219532 0.015561

**TS<sub>23-24</sub>**

SCF energy in gas phase: -3688.53111153

Thermal correction to Enthalpy in gas phase: 0.933971

Thermal correction to Gibbs Free Energy in gas phase: 0.810848

SCF energy in solvent: -3688.77619443

Co -0.405759 0.262451 -0.492698  
P -0.760029 2.339440 0.092176  
P -0.531649 -1.794950 -1.161088  
B -0.165850 -0.460727 1.348535  
B 1.471013 0.410153 -0.755962  
N -2.448319 0.289308 -0.895110  
H 0.135431 0.812925 -1.830240  
O -1.076093 -1.262344 2.062737  
O 0.983303 -0.336853 2.134930  
O 2.301256 -0.524836 -1.403235  
O 2.283049 1.464181 -0.316255  
C -0.595697 -1.547571 3.380439  
C 0.928238 -1.173020 3.289869

|   |           |           |           |   |           |           |           |
|---|-----------|-----------|-----------|---|-----------|-----------|-----------|
| C | 3.595329  | 0.041272  | -1.593567 | H | 5.506396  | 2.084770  | -0.983643 |
| C | 3.653338  | 1.101299  | -0.450649 | H | 4.055818  | 2.872054  | -1.632917 |
| C | -0.875668 | -3.011151 | 3.689079  | H | 4.451926  | 3.022121  | 0.081345  |
| C | -1.377424 | -0.672880 | 4.356751  | C | -1.368386 | 2.817760  | 1.775337  |
| C | 1.848248  | -2.366917 | 3.040613  | C | -2.253960 | 2.694165  | -0.931932 |
| C | 1.466688  | -0.395361 | 4.483642  | C | 0.369316  | 3.747759  | -0.345599 |
| C | 4.642006  | -1.055950 | -1.502714 | C | 0.214945  | -3.250036 | -0.275091 |
| C | 3.620754  | 0.668297  | -2.986792 | C | -0.255927 | -2.039342 | -2.979627 |
| C | 4.105099  | 0.510098  | 0.883023  | C | -2.323817 | -2.119844 | -0.877966 |
| C | 4.465994  | 2.343756  | -0.773341 | C | -3.117342 | -0.863573 | -1.068536 |
| H | -0.474597 | -3.288907 | 4.666235  | C | -3.094165 | 1.457370  | -1.055810 |
| H | -1.953890 | -3.177493 | 3.704745  | H | -1.731216 | 3.855453  | 1.696746  |
| H | -0.443229 | -3.671143 | 2.937934  | C | -0.222897 | 2.777225  | 2.790395  |
| H | -2.443277 | -0.865765 | 4.226895  | C | -2.559210 | 1.947734  | 2.191927  |
| H | -1.108555 | -0.889547 | 5.392073  | H | -2.846385 | 3.548146  | -0.572668 |
| H | -1.204597 | 0.384987  | 4.167203  | H | -1.879712 | 2.944113  | -1.937582 |
| H | 2.855615  | -1.996438 | 2.846549  | H | 1.284808  | 3.509451  | 0.214635  |
| H | 1.887112  | -3.031907 | 3.905185  | C | 0.739390  | 3.754015  | -1.832925 |
| H | 1.537280  | -2.944347 | 2.172867  | C | -0.136541 | 5.134283  | 0.068767  |
| H | 1.412933  | -0.995109 | 5.395060  | H | 0.068428  | -2.930140 | 0.766646  |
| H | 2.512375  | -0.143433 | 4.302090  | C | 1.720322  | -3.395778 | -0.508258 |
| H | 0.921665  | 0.531974  | 4.646783  | C | -0.500811 | -4.601957 | -0.402824 |
| H | 4.512577  | -1.756616 | -2.329332 | H | 0.776606  | -1.669823 | -3.099184 |
| H | 5.648410  | -0.635696 | -1.566767 | C | -1.183988 | -1.118130 | -3.781288 |
| H | 4.556420  | -1.612117 | -0.570703 | C | -0.344477 | -3.467692 | -3.519478 |
| H | 4.603886  | 1.074099  | -3.232191 | H | -2.385092 | -2.396778 | 0.187455  |
| H | 3.370462  | -0.099047 | -3.720839 | H | -2.734385 | -2.946699 | -1.474219 |
| H | 2.881333  | 1.466411  | -3.067192 | C | -4.473500 | -0.883404 | -1.389041 |
| H | 3.924445  | 1.244738  | 1.668652  | C | -4.451864 | 1.508904  | -1.365442 |
| H | 3.520471  | -0.376997 | 1.127806  | H | 0.271032  | 1.795364  | 2.792902  |
| H | 5.167306  | 0.257805  | 0.875121  | H | 0.549525  | 3.527583  | 2.562675  |

H -0.601315 2.986639 3.804355  
H -2.841572 2.169437 3.233825  
H -3.442801 2.142121 1.565080  
H -2.328080 0.875435 2.119448  
H -0.091753 4.129495 -2.452991  
H 1.594901 4.428113 -1.995801  
H 1.012452 2.754993 -2.191677  
H 0.569972 5.902248 -0.284389  
H -1.116556 5.366059 -0.380544  
H -0.225125 5.252439 1.157586  
H 2.113356 -4.211639 0.120121  
H 1.953587 -3.642352 -1.555811  
H 2.252532 -2.469170 -0.265376  
H -0.060526 -5.303080 0.325175  
H -1.574540 -4.540157 -0.176846  
H -0.387189 -5.055175 -1.396118  
H -2.230358 -1.464446 -3.734354  
H -1.139600 -0.084477 -3.411671  
H -0.886439 -1.120557 -4.841676  
H -0.207902 -3.458428 -4.612919  
H 0.427137 -4.126421 -3.099915  
H -1.329231 -3.921672 -3.319840  
C -5.153159 0.320356 -1.531205  
H -4.983495 -1.838315 -1.517950  
H -4.942163 2.475425 -1.484354  
H -6.216638 0.332367 -1.775999

**24**

SCF energy in gas phase: -3688.53105763  
Thermal correction to Enthalpy in gas  
phase: 0.934609

Thermal correction to Gibbs Free Energy  
in gas phase: 0.806343  
SCF energy in solvent: -3688.77622751  
Co -0.395405 0.242004 -0.498429  
P -0.816069 2.322113 0.046136  
P -0.473737 -1.834502 -1.116895  
B -0.175995 -0.426928 1.359524  
B 1.477008 0.431013 -0.782910  
N -2.427558 0.221950 -0.963003  
H 0.243555 0.773189 -1.813389  
O -1.071709 -1.250030 2.068599  
O 0.943786 -0.235431 2.173839  
O 2.338734 -0.516402 -1.374486  
O 2.265685 1.513915 -0.364616  
C -0.614122 -1.487830 3.403567  
C 0.895138 -1.055624 3.340573  
C 3.626280 0.064893 -1.556766  
C 3.642064 1.161605 -0.448316  
C -0.843475 -2.954250 3.739234  
C -1.453977 -0.624375 4.340700  
C 1.865201 -2.216493 3.128419  
C 1.375649 -0.241290 4.534228  
C 4.689323 -1.009988 -1.408674  
C 3.671481 0.648623 -2.968144  
C 4.063010 0.617371 0.915156  
C 4.451618 2.401277 -0.788656  
H -0.455239 -3.193687 4.731517  
H -1.914231 -3.163388 3.734178  
H -0.367623 -3.613505 3.014469  
H -2.507679 -0.862242 4.188836  
H -1.203871 -0.808278 5.386897

|   |           |           |           |   |           |           |           |
|---|-----------|-----------|-----------|---|-----------|-----------|-----------|
| H | -1.318610 | 0.435298  | 4.132338  | H | -1.865220 | 2.857392  | -2.038556 |
| H | 2.861304  | -1.809723 | 2.950512  | H | 1.203676  | 3.532091  | 0.205988  |
| H | 1.910936  | -2.868592 | 4.002300  | C | 0.691081  | 3.764822  | -1.851912 |
| H | 1.594951  | -2.815624 | 2.261770  | C | -0.245508 | 5.129849  | 0.029303  |
| H | 1.322269  | -0.829351 | 5.453174  | H | 0.119439  | -2.914439 | 0.843370  |
| H | 2.415240  | 0.047254  | 4.374019  | C | 1.791586  | -3.382308 | -0.403557 |
| H | 0.792609  | 0.667056  | 4.670203  | C | -0.413533 | -4.620533 | -0.290957 |
| H | 4.588927  | -1.739676 | -2.213862 | H | 0.877312  | -1.747639 | -3.029126 |
| H | 5.689581  | -0.574606 | -1.466349 | C | -1.065506 | -1.205309 | -3.764386 |
| H | 4.593994  | -1.536642 | -0.460768 | C | -0.237142 | -3.551354 | -3.438130 |
| H | 4.652620  | 1.063244  | -3.206180 | H | -2.347625 | -2.426650 | 0.205229  |
| H | 3.449339  | -0.145317 | -3.682600 | H | -2.646810 | -3.034551 | -1.446535 |
| H | 2.920998  | 1.431186  | -3.088729 | C | -4.421511 | -0.998797 | -1.467911 |
| H | 3.850384  | 1.372893  | 1.672239  | C | -4.440875 | 1.393218  | -1.509930 |
| H | 3.482823  | -0.269560 | 1.170283  | H | 0.134089  | 1.854598  | 2.789647  |
| H | 5.128008  | 0.379212  | 0.945784  | H | 0.365888  | 3.590339  | 2.540755  |
| H | 5.499798  | 2.146414  | -0.961901 | H | -0.811068 | 3.032591  | 3.749563  |
| H | 4.060437  | 2.897644  | -1.675512 | H | -2.997051 | 2.129795  | 3.118278  |
| H | 4.407621  | 3.106510  | 0.042845  | H | -3.543369 | 2.059337  | 1.432192  |
| C | -1.499975 | 2.806501  | 1.698149  | H | -2.405729 | 0.838606  | 2.039904  |
| C | -2.275923 | 2.626737  | -1.042727 | H | -0.132395 | 4.135194  | -2.484982 |
| C | 0.294169  | 3.752231  | -0.371306 | H | 1.542941  | 4.447194  | -1.997432 |
| C | 0.281997  | -3.256437 | -0.188425 | H | 0.983086  | 2.770773  | -2.209129 |
| C | -0.157773 | -2.112713 | -2.924494 | H | 0.452641  | 5.909914  | -0.313601 |
| C | -2.265434 | -2.182675 | -0.866774 | H | -1.221005 | 5.341286  | -0.439203 |
| C | -3.073920 | -0.946487 | -1.116793 | H | -0.356668 | 5.250290  | 1.115548  |
| C | -3.090719 | 1.373540  | -1.166382 | H | 2.193620  | -4.171091 | 0.252820  |
| H | -1.893128 | 3.830203  | 1.588964  | H | 2.039789  | -3.656040 | -1.440694 |
| C | -0.390349 | 2.819600  | 2.753312  | H | 2.304242  | -2.438637 | -0.185529 |
| C | -2.674418 | 1.903382  | 2.089269  | H | 0.034623  | -5.300443 | 0.452133  |
| H | -2.894629 | 3.479884  | -0.728941 | H | -1.488305 | -4.568293 | -0.067681 |

|                                                                |           |           |           |   |           |           |           |
|----------------------------------------------------------------|-----------|-----------|-----------|---|-----------|-----------|-----------|
| H                                                              | -0.292103 | -5.092503 | -1.274460 | C | -3.493059 | 0.495843  | -1.744653 |
| H                                                              | -2.114082 | -1.546040 | -3.731285 | C | -3.165317 | -1.011452 | -1.989538 |
| H                                                              | -1.025477 | -0.164295 | -3.415879 | C | 0.664101  | -1.426674 | 4.075689  |
| H                                                              | -0.746461 | -1.230983 | -4.818036 | C | -0.087317 | -3.629012 | 3.207654  |
| H                                                              | -0.084438 | -3.563218 | -4.529320 | C | -2.191920 | -0.970273 | 4.184596  |
| H                                                              | 0.529026  | -4.200819 | -2.995023 | C | -2.619752 | -2.588532 | 2.359899  |
| H                                                              | -1.223974 | -4.003139 | -3.244526 | C | -4.786081 | 0.756569  | -0.989656 |
| C                                                              | -5.117501 | 0.188448  | -1.661059 | C | -3.483313 | 1.308927  | -3.038776 |
| H                                                              | -4.912326 | -1.965730 | -1.580152 | C | -3.681079 | -1.900902 | -0.867086 |
| H                                                              | -4.944714 | 2.347599  | -1.664354 | C | -3.608400 | -1.561355 | -3.334897 |
| H                                                              | -6.174645 | 0.175139  | -1.931451 | H | 0.337075  | -1.677830 | 5.086128  |
| <b>TS<sub>24-25</sub></b>                                      |           |           |           | H | 1.700866  | -1.743950 | 3.957260  |
| SCF energy in gas phase: -3688.52072229                        |           |           |           | H | 0.632706  | -0.343054 | 3.958725  |
| Thermal correction to Enthalpy in gas phase: 0.935004          |           |           |           | H | 0.963162  | -3.920153 | 3.260563  |
| Thermal correction to Gibbs Free Energy in gas phase: 0.813902 |           |           |           | H | -0.570786 | -3.935419 | 4.138027  |
| SCF energy in solvent: -3688.76619415                          |           |           |           | H | -0.545828 | -4.168516 | 2.380869  |
| Co                                                             | 0.446452  | 0.347359  | -0.334021 | H | -3.180559 | -0.550886 | 3.992284  |
| P                                                              | 1.573136  | -1.391151 | -1.114416 | H | -2.293894 | -1.747042 | 4.946085  |
| P                                                              | -0.048158 | 2.286526  | 0.520209  | H | -1.561992 | -0.178798 | 4.582918  |
| B                                                              | -0.296551 | -0.677034 | 1.188554  | H | -2.782831 | -3.392381 | 3.079640  |
| B                                                              | -1.286349 | 0.074658  | -1.172824 | H | -3.577767 | -2.104424 | 2.170407  |
| N                                                              | 2.353191  | 1.146574  | -0.279329 | H | -2.266416 | -3.021311 | 1.424524  |
| H                                                              | -0.108909 | 0.682454  | -1.799248 | H | -4.929903 | 1.832282  | -0.874099 |
| O                                                              | 0.365004  | -1.789539 | 1.744564  | H | -5.644489 | 0.356127  | -1.534154 |
| O                                                              | -1.483677 | -0.516255 | 1.925530  | H | -4.758522 | 0.310928  | 0.003045  |
| O                                                              | -2.397967 | 0.911418  | -0.935402 | H | -4.317775 | 1.036306  | -3.687039 |
| O                                                              | -1.743931 | -1.022073 | -1.933167 | H | -3.570005 | 2.368552  | -2.800052 |
| C                                                              | -0.183584 | -2.123996 | 3.011022  | H | -2.551748 | 1.158129  | -3.586492 |
| C                                                              | -1.633277 | -1.557619 | 2.897699  | H | -3.238717 | -2.893142 | -0.969196 |
|                                                                |           |           |           | H | -3.380804 | -1.489659 | 0.093487  |
|                                                                |           |           |           | H | -4.767739 | -2.001784 | -0.889785 |

|   |           |           |           |                                       |                |           |           |
|---|-----------|-----------|-----------|---------------------------------------|----------------|-----------|-----------|
| H | -4.692011 | -1.482172 | -3.449409 | H                                     | 3.687493       | -2.343460 | 1.853577  |
| H | -3.129379 | -1.034827 | -4.158734 | H                                     | 4.126760       | -3.995112 | 0.071904  |
| H | -3.336915 | -2.616222 | -3.402410 | H                                     | 3.004793       | -4.228122 | -1.277036 |
| C | 2.576213  | -2.488776 | -0.000542 | H                                     | 4.246677       | -2.955581 | -1.357176 |
| C | 2.859538  | -0.431430 | -2.021644 | H                                     | 2.496056       | -3.689048 | -3.183442 |
| C | 0.820358  | -2.483290 | -2.394841 | H                                     | 1.099059       | -3.531476 | -4.261836 |
| C | -1.379889 | 2.664331  | 1.762205  | H                                     | 2.213470       | -2.170808 | -4.062134 |
| C | -0.112661 | 3.726092  | -0.668663 | H                                     | -0.627054      | -4.100405 | -2.436889 |
| C | 1.527137  | 2.648407  | 1.413106  | H                                     | 0.700902       | -4.375427 | -1.284785 |
| C | 2.661216  | 2.143043  | 0.571215  | H                                     | -0.595410      | -3.205848 | -0.901888 |
| C | 3.300896  | 0.677064  | -1.114341 | H                                     | -2.689304      | 4.184117  | 2.559663  |
| H | 1.802232  | -3.061657 | 0.528257  | H                                     | -1.114069      | 4.821955  | 2.058632  |
| C | 3.326304  | -1.671001 | 1.059009  | H                                     | -2.349039      | 4.423517  | 0.838494  |
| C | 3.532568  | -3.465267 | -0.690082 | H                                     | -1.836576      | 2.225343  | 3.833401  |
| H | 3.711926  | -1.019697 | -2.387123 | H                                     | -0.475776      | 1.286485  | 3.204236  |
| H | 2.338349  | 0.005398  | -2.890027 | H                                     | -0.261406      | 3.016450  | 3.607594  |
| H | 0.073380  | -1.809804 | -2.837951 | H                                     | -1.230895      | 2.868697  | -2.311830 |
| C | 1.717915  | -2.993542 | -3.525438 | H                                     | -2.276397      | 3.497338  | -1.040682 |
| C | 0.035292  | -3.606620 | -1.709054 | H                                     | -1.427799      | 4.632638  | -2.130194 |
| H | -2.187661 | 1.987114  | 1.446542  | H                                     | 0.998064       | 4.667047  | -2.266651 |
| C | -1.905672 | 4.103141  | 1.789418  | H                                     | 2.049965       | 4.071551  | -0.971716 |
| C | -0.952442 | 2.272168  | 3.179516  | H                                     | 1.307880       | 2.921145  | -2.115206 |
| H | -0.168532 | 4.626997  | -0.035972 | C                                     | 4.929594       | 2.190371  | -0.212581 |
| C | -1.339860 | 3.681468  | -1.580989 | H                                     | 4.161793       | 3.467232  | 1.359669  |
| C | 1.139927  | 3.847405  | -1.544563 | H                                     | 5.333484       | 0.784150  | -1.810307 |
| H | 1.498511  | 2.060577  | 2.342528  | H                                     | 5.942097       | 2.595935  | -0.181299 |
| H | 1.667019  | 3.706245  | 1.681079  | <b>25</b>                             |                |           |           |
| C | 3.947048  | 2.673334  | 0.644041  | SCF energy in gas phase:              | -3688.53180242 |           |           |
| C | 4.596917  | 1.185846  | -1.114347 | Thermal correction to Enthalpy in gas |                |           |           |
| H | 4.207888  | -1.166314 | 0.632059  | phase:                                | 0.936377       |           |           |
| H | 2.674752  | -0.917855 | 1.518990  |                                       |                |           |           |

|                                         |   |           |           |           |
|-----------------------------------------|---|-----------|-----------|-----------|
| Thermal correction to Gibbs Free Energy | H | 4.471303  | -0.068621 | -1.528227 |
| in gas phase: 0.81079                   | H | 2.496517  | 4.198218  | -1.502213 |
| SCF energy in solvent: -3688.77662265   | H | 3.439639  | 3.466528  | -2.804660 |
| Co -0.719432 -0.055227 0.168812         | H | 1.667510  | 3.415682  | -2.850118 |
| P -0.915748 -1.864744 -1.040219         | H | 4.640495  | 2.252697  | -0.788362 |
| P -1.290015 2.040268 0.479850           | H | 3.441395  | 2.933096  | 0.326649  |
| B 0.917754 0.559541 -0.716987           | H | 3.644979  | 1.191521  | 0.237710  |
| B 0.854896 -0.623112 1.309590           | H | 4.023243  | 0.889062  | 3.315072  |
| N -2.642472 -0.477316 0.641607          | H | 4.737054  | -0.728825 | 3.364550  |
| H -0.391761 -0.444301 1.691674          | H | 4.512656  | 0.096516  | 1.817362  |
| O 1.812234 -0.147985 -1.535785          | H | 2.701978  | -1.359373 | 4.780388  |
| O 1.315214 1.904260 -0.743568           | H | 1.978966  | 0.234983  | 4.513396  |
| O 1.835507 0.176507 1.935709            | H | 1.083317  | -1.220776 | 4.068439  |
| O 1.273533 -1.967390 1.400279           | H | 3.340964  | -2.955598 | 0.135201  |
| C 2.613744 0.763095 -2.290433           | H | 3.446076  | -1.202017 | 0.098770  |
| C 2.560486 2.055079 -1.415690           | H | 4.606525  | -2.145921 | 1.067429  |
| C 2.684178 -0.673475 2.705605           | H | 3.725274  | -3.279908 | 3.265972  |
| C 2.601705 -2.017525 1.917113           | H | 1.972450  | -3.323107 | 3.529885  |
| C 1.951682 0.942963 -3.655277           | H | 2.678121  | -4.152106 | 2.140472  |
| C 4.001205 0.173094 -2.479146           | C | -1.906804 | -1.847147 | -2.620232 |
| C 2.537844 3.358383 -2.197839           | C | -2.018815 | -2.756178 | 0.153305  |
| C 3.650902 2.105783 -0.352183           | C | 0.367369  | -3.176046 | -1.376989 |
| C 4.074166 -0.070402 2.798456           | C | -1.220094 | 3.432593  | -0.752172 |
| C 2.077083 -0.771949 4.105717           | C | -0.787173 | 2.892001  | 2.055200  |
| C 3.568599 -2.074931 0.737917           | C | -3.116961 | 1.893092  | 0.740334  |
| C 2.751232 -3.264883 2.771420           | C | -3.511596 | 0.475061  | 1.026435  |
| H 2.529915 1.608326 -4.298176           | C | -3.000346 | -1.774050 | 0.717537  |
| H 1.879802 -0.027871 -4.147027          | H | -1.849064 | -2.863390 | -3.047732 |
| H 0.943116 1.343505 -3.552864           | C | -1.292211 | -0.850062 | -3.607081 |
| H 3.931777 -0.744709 -3.065124          | C | -3.383007 | -1.497845 | -2.411717 |
| H 4.645671 0.872447 -3.016604           | H | -2.539689 | -3.639022 | -0.244758 |

H -1.337735 -3.089669 0.953724  
H 1.067002 -3.023635 -0.544164  
C -0.170705 -4.610086 -1.305586  
C 1.135142 -2.986023 -2.688506  
H -0.158315 3.712698 -0.752797  
C -2.055965 4.666187 -0.401713  
C -1.549290 2.916158 -2.152285  
H -1.451562 3.766937 2.157744  
C 0.665165 3.375727 2.019831  
C -1.019091 1.982681 3.265629  
H -3.603993 2.174333 -0.208641  
H -3.502698 2.579248 1.508132  
C -4.745081 0.149382 1.587192  
C -4.221310 -2.162352 1.262626  
H -1.377830 0.169055 -3.202530  
H -0.229069 -1.037795 -3.795321  
H -1.823774 -0.887991 -4.571430  
H -3.897215 -1.462739 -3.385459  
H -3.914018 -2.228676 -1.784965  
H -3.487670 -0.505102 -1.945525  
H -0.988620 -4.782434 -2.025681  
H 0.635686 -5.316396 -1.560561  
H -0.532729 -4.882128 -0.304767  
H 1.978927 -3.694291 -2.717636  
H 0.503464 -3.201174 -3.565774  
H 1.541750 -1.971985 -2.769861  
H -1.912226 5.445491 -1.167357  
H -3.134817 4.442497 -0.370477  
H -1.773682 5.105695 0.565622  
H -1.421103 3.716634 -2.898444  
H -0.890500 2.078704 -2.416439

H -2.590461 2.558721 -2.229598  
H 1.349680 2.525871 1.887228  
H 0.845770 4.090720 1.203849  
H 0.910420 3.879649 2.968940  
H -0.861331 2.551173 4.196085  
H -2.040328 1.570374 3.298259  
H -0.313676 1.140447 3.256266  
C -5.099423 -1.187630 1.721755  
H -5.419934 0.946825 1.898673  
H -4.471255 -3.221792 1.320076  
H -6.058874 -1.466283 2.160653

**TS<sub>25-11</sub>**

SCF energy in gas phase: -3688.51713621

Thermal correction to Enthalpy in gas phase: 0.935821

Thermal correction to Gibbs Free Energy in gas phase: 0.807609

SCF energy in solvent: -3688.76308326

Co 1.012325 -0.113931 0.049919  
P 0.946990 -1.366837 1.791935  
P 1.616880 1.187041 -1.515719  
B -0.313056 1.224982 0.674087  
B -1.575371 -1.779324 -1.020349  
N 2.509581 -1.318180 -0.558439  
H -0.396920 -1.835301 -0.844366  
O -1.714957 1.241445 0.514204  
O 0.027063 2.416807 1.343423  
O -2.141557 -1.081192 -2.042074  
O -2.486989 -2.458085 -0.264102  
C -2.305100 2.354817 1.193358  
C -1.083158 3.307051 1.423119

|   |           |           |           |   |           |           |           |
|---|-----------|-----------|-----------|---|-----------|-----------|-----------|
| C | -3.541983 | -1.402993 | -2.088561 | H | -5.726139 | -2.936497 | -1.020289 |
| C | -3.804841 | -2.022567 | -0.666626 | H | -4.358200 | -4.034214 | -1.272355 |
| C | -2.921085 | 1.871516  | 2.504066  | H | -4.843096 | -3.587484 | 0.364839  |
| C | -3.408078 | 2.923367  | 0.311389  | C | 2.028561  | -0.832793 | 3.199194  |
| C | -1.049359 | 4.004196  | 2.775657  | C | 1.809303  | -2.885333 | 1.167450  |
| C | -0.937184 | 4.360669  | 0.327211  | C | -0.517908 | -2.204625 | 2.571077  |
| C | -4.311272 | -0.126473 | -2.377994 | C | 2.072590  | 2.951298  | -1.187970 |
| C | -3.725109 | -2.399358 | -3.228161 | C | 0.699571  | 1.263185  | -3.125011 |
| C | -4.262149 | -0.992301 | 0.355740  | C | 3.234406  | 0.469006  | -2.050191 |
| C | -4.736560 | -3.220577 | -0.656438 | C | 3.349954  | -0.943289 | -1.553685 |
| H | -3.447091 | 2.682790  | 3.010268  | C | 2.705854  | -2.527065 | 0.018843  |
| H | -3.637415 | 1.075298  | 2.301187  | H | 2.147273  | -1.690259 | 3.883090  |
| H | -2.162473 | 1.478404  | 3.177477  | C | 1.393357  | 0.335675  | 3.959872  |
| H | -4.222965 | 2.200799  | 0.237598  | C | 3.410768  | -0.439041 | 2.667636  |
| H | -3.815308 | 3.844251  | 0.734727  | H | 2.370039  | -3.443370 | 1.933195  |
| H | -3.046968 | 3.128442  | -0.695192 | H | 1.013265  | -3.553506 | 0.799966  |
| H | -0.159269 | 4.632442  | 2.832386  | H | -0.881400 | -2.830699 | 1.738496  |
| H | -1.925399 | 4.642351  | 2.912368  | C | -0.181674 | -3.116760 | 3.753366  |
| H | -1.006192 | 3.288034  | 3.593911  | C | -1.658063 | -1.250000 | 2.908939  |
| H | -1.725004 | 5.113424  | 0.388370  | H | 1.107921  | 3.425182  | -0.961986 |
| H | 0.024850  | 4.861677  | 0.443542  | C | 2.721250  | 3.696519  | -2.356203 |
| H | -0.972655 | 3.907662  | -0.662844 | C | 2.923017  | 3.045991  | 0.082408  |
| H | -4.058849 | 0.228857  | -3.377683 | H | 1.303706  | 1.866751  | -3.823287 |
| H | -5.387901 | -0.304436 | -2.339623 | C | -0.663249 | 1.934990  | -2.935879 |
| H | -4.053296 | 0.655094  | -1.665972 | C | 0.555154  | -0.140930 | -3.718342 |
| H | -4.774869 | -2.662389 | -3.365015 | H | 4.031094  | 1.053222  | -1.562094 |
| H | -3.357545 | -1.948661 | -4.150322 | H | 3.417168  | 0.529767  | -3.133023 |
| H | -3.156345 | -3.312496 | -3.048460 | C | 4.334619  | -1.793570 | -2.051065 |
| H | -4.275799 | -1.455137 | 1.342811  | C | 3.690352  | -3.409888 | -0.421095 |
| H | -3.568691 | -0.152964 | 0.382908  | H | 1.159260  | 1.166938  | 3.275638  |
| H | -5.265993 | -0.628479 | 0.130999  | H | 0.463197  | 0.040121  | 4.466806  |

|   |           |           |           |
|---|-----------|-----------|-----------|
| H | 2.086267  | 0.706077  | 4.732494  |
| H | 4.054509  | -0.105847 | 3.497303  |
| H | 3.920597  | -1.275764 | 2.165320  |
| H | 3.321175  | 0.382890  | 1.939791  |
| H | 0.127736  | -2.532230 | 4.634468  |
| H | -1.069963 | -3.699535 | 4.045440  |
| H | 0.622148  | -3.833041 | 3.524548  |
| H | -2.557574 | -1.822955 | 3.187334  |
| H | -1.410372 | -0.596071 | 3.758407  |
| H | -1.904671 | -0.617946 | 2.048685  |
| H | 2.969383  | 4.727112  | -2.055242 |
| H | 3.661299  | 3.217221  | -2.676252 |
| H | 2.061115  | 3.762766  | -3.233077 |
| H | 3.066140  | 4.101924  | 0.363475  |
| H | 2.432390  | 2.528286  | 0.917212  |
| H | 3.926222  | 2.611210  | -0.063682 |
| H | -1.257764 | 1.408265  | -2.173869 |
| H | -0.556089 | 2.987212  | -2.628781 |
| H | -1.229103 | 1.924229  | -3.881257 |
| H | 0.009270  | -0.091894 | -4.674158 |
| H | 1.530692  | -0.610624 | -3.918588 |
| H | -0.011468 | -0.796623 | -3.045281 |
| C | 4.505353  | -3.051282 | -1.486429 |
| H | 4.973674  | -1.449724 | -2.864836 |
| H | 3.801236  | -4.374884 | 0.074250  |
| H | 5.272871  | -3.732031 | -1.858086 |
